# Supplementary material for: Novel piperazine–chalcone hybrids and related pyrazoline analogues targeting VEGFR-2 kinase; design, synthesis, molecular docking studies, and anticancer evaluation
Source: PubMed Central journal article supplement (PMC7758046; doi:10.1080/14756366.2020.1861606), 2020-12-21

## Supplementary Materials

### Novel Piperazine-Chalcone Hybrids and Related Pyrazoline Analogs Targeting VEGFR-2 kinase; Design, Synthesis, Molecular Docking studies and Anticancer Evaluation

Marwa F. Ahmed<sup>a,b\*</sup>, Eman Y. Santali<sup>a</sup> and Radwan El-Haggar<sup>b\*</sup>

<sup>a</sup>*Department of Pharmaceutical Chemistry, Faculty of Pharmacy, Taif University, Taif 21974, Kingdom of Saudi Arabia.*

<sup>b</sup>*Department of Pharmaceutical Chemistry, Faculty of Pharmacy, Helwan University, Cairo, 11795, Egypt.*

**\* Corresponding authors:**

Dr. Radwan El-Haggar, **Email:** [radwan\\_elhaggar@pharm.helwan.edu.eg](mailto:radwan_elhaggar@pharm.helwan.edu.eg)

Dr. Marwa F. Ahmed, **Email:** [marwafarag80@yahoo.com](mailto:marwafarag80@yahoo.com)

## Supplementary Materials

|                                                                                    |       |
|------------------------------------------------------------------------------------|-------|
| NCI data                                                                           | 3-14  |
| Representative $^1\text{H}$ and $^{13}\text{C}$ NMR spectra for selected compounds | 15-36 |

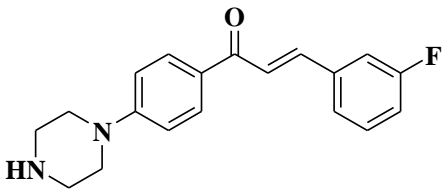

Vd

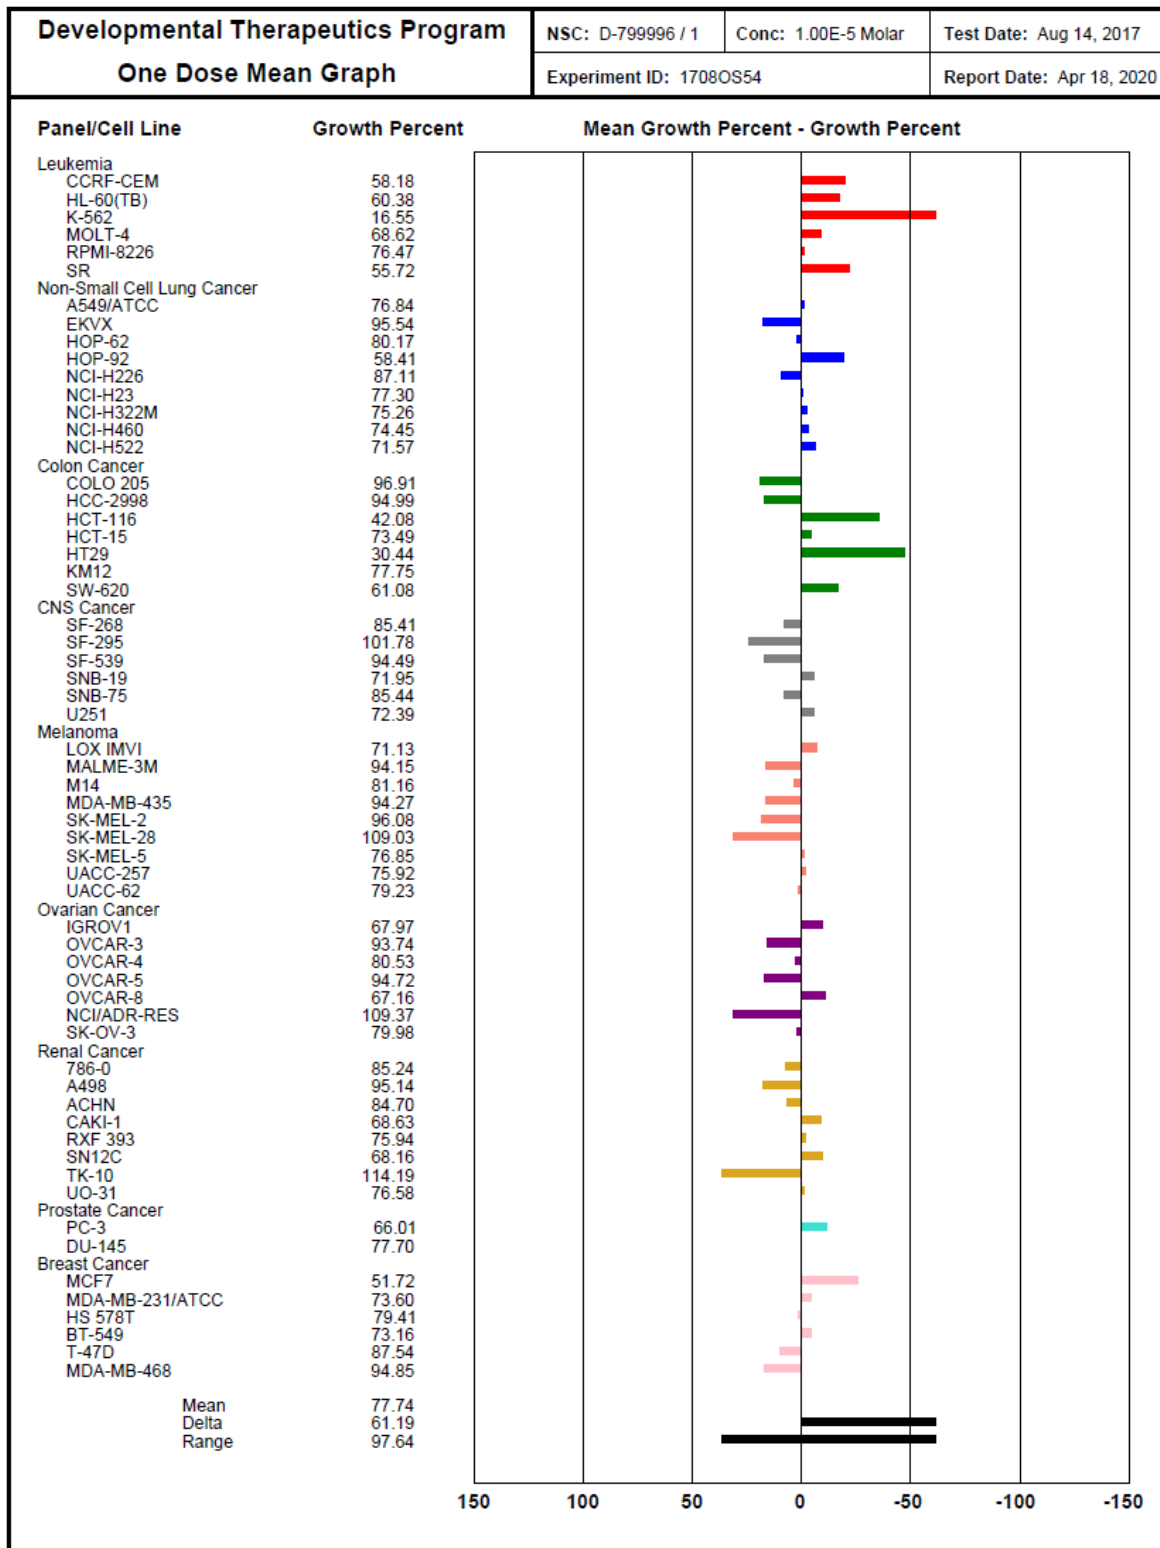



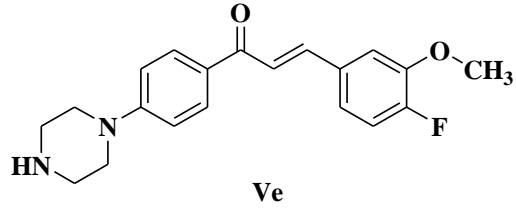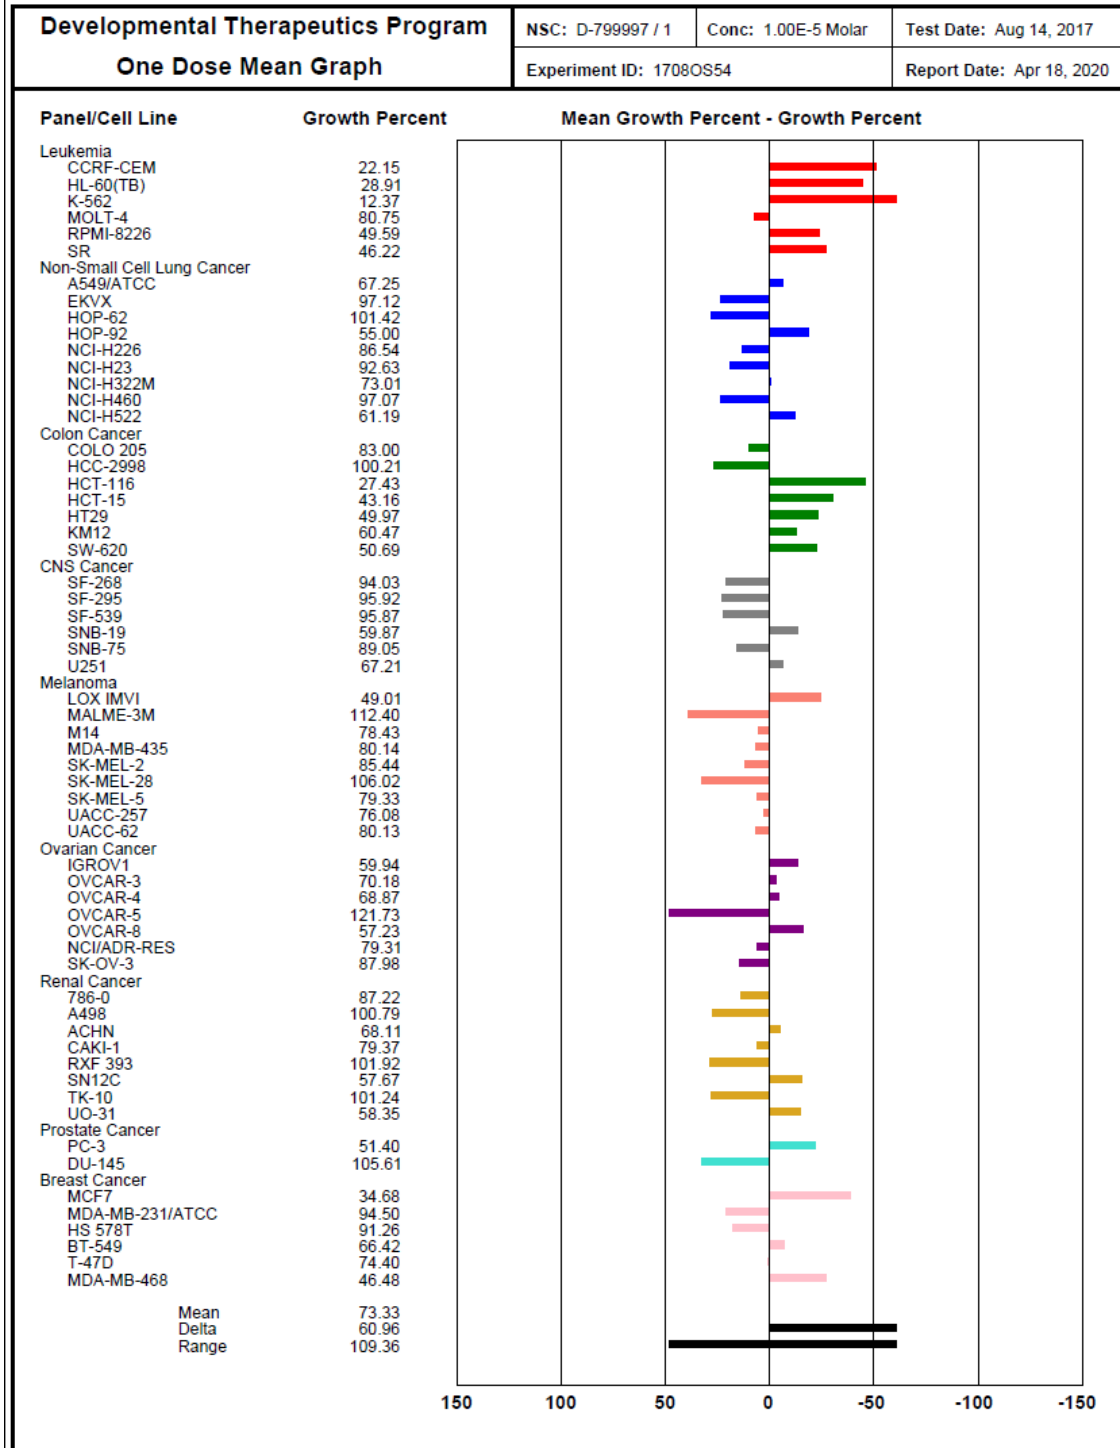

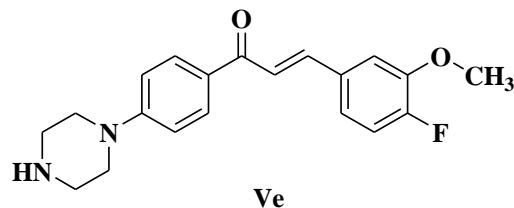

| A1 |        |         |         |        |        | NSC    |         |      |         |        |        |        |        |           |          |         |  |
|----|--------|---------|---------|--------|--------|--------|---------|------|---------|--------|--------|--------|--------|-----------|----------|---------|--|
|    | A      | B       | C       | D      | E      | F      | G       | H    | I       | J      | K      | L      | M      | N         | O        | P       |  |
| 1  | NSC    | EXPID   | PLANDA  | TESTSE | PREFIX | SAMPLE | DISCREI | CONC | CONCUI  | CONCUI | PANELN | CELLNB | PANELN | CELLNA    | GIPRCNT  |         |  |
| 2  | 799997 | 17080S5 | Mon Aug | 113    | S      |        | 1       | D    | 0.00001 | M      | Molar  | 7      | 3      | Leukemi   | CCR-F-C  | 22.1479 |  |
| 3  | 799997 | 17080S5 | Mon Aug | 113    | S      |        | 1       | D    | 0.00001 | M      | Molar  | 7      | 8      | Leukemi   | HL-60(TE | 28.9061 |  |
| 4  | 799997 | 17080S5 | Mon Aug | 113    | S      |        | 1       | D    | 0.00001 | M      | Molar  | 7      | 5      | Leukemi   | K-562    | 12.373  |  |
| 5  | 799997 | 17080S5 | Mon Aug | 113    | S      |        | 1       | D    | 0.00001 | M      | Molar  | 7      | 6      | Leukemi   | MOLT-4   | 80.7468 |  |
| 6  | 799997 | 17080S5 | Mon Aug | 113    | S      |        | 1       | D    | 0.00001 | M      | Molar  | 7      | 10     | Leukemi   | RPMI-82  | 49.5889 |  |
| 7  | 799997 | 17080S5 | Mon Aug | 113    | S      |        | 1       | D    | 0.00001 | M      | Molar  | 7      | 19     | Leukemi   | SR       | 46.2222 |  |
| 8  | 799997 | 17080S5 | Mon Aug | 113    | S      |        | 1       | D    | 0.00001 | M      | Molar  | 1      | 4      | Non-Sm    | A549IAT  | 67.25   |  |
| 9  | 799997 | 17080S5 | Mon Aug | 113    | S      |        | 1       | D    | 0.00001 | M      | Molar  | 1      | 8      | Non-Sm    | EKVX     | 97.1164 |  |
| 10 | 799997 | 17080S5 | Mon Aug | 113    | S      |        | 1       | D    | 0.00001 | M      | Molar  | 1      | 26     | Non-Sm    | HOP-62   | 101.422 |  |
| 11 | 799997 | 17080S5 | Mon Aug | 113    | S      |        | 1       | D    | 0.00001 | M      | Molar  | 1      | 29     | Non-Sm    | HOP-92   | 54.9957 |  |
| 12 | 799997 | 17080S5 | Mon Aug | 113    | S      |        | 1       | D    | 0.00001 | M      | Molar  | 1      | 13     | Non-Sm    | NCI-H22  | 86.5426 |  |
| 13 | 799997 | 17080S5 | Mon Aug | 113    | S      |        | 1       | D    | 0.00001 | M      | Molar  | 1      | 1      | Non-Sm    | NCI-H23  | 92.629  |  |
| 14 | 799997 | 17080S5 | Mon Aug | 113    | S      |        | 1       | D    | 0.00001 | M      | Molar  | 1      | 17     | Non-Sm    | NCI-H32  | 73.0061 |  |
| 15 | 799997 | 17080S5 | Mon Aug | 113    | S      |        | 1       | D    | 0.00001 | M      | Molar  | 1      | 21     | Non-Sm    | NCI-H46  | 97.0664 |  |
| 16 | 799997 | 17080S5 | Mon Aug | 113    | S      |        | 1       | D    | 0.00001 | M      | Molar  | 1      | 3      | Non-Sm    | NCI-H52  | 61.1934 |  |
| 17 | 799997 | 17080S5 | Mon Aug | 113    | S      |        | 1       | D    | 0.00001 | M      | Molar  | 4      | 10     | Colon C   | COLO 20  | 82.9973 |  |
| 18 | 799997 | 17080S5 | Mon Aug | 113    | S      |        | 1       | D    | 0.00001 | M      | Molar  | 4      | 2      | Colon C   | HCC-299  | 100.206 |  |
| 19 | 799997 | 17080S5 | Mon Aug | 113    | S      |        | 1       | D    | 0.00001 | M      | Molar  | 4      | 3      | Colon C   | HCT-116  | 27.4341 |  |
| 20 | 799997 | 17080S5 | Mon Aug | 113    | S      |        | 1       | D    | 0.00001 | M      | Molar  | 4      | 15     | Colon C   | HCT-15   | 43.1587 |  |
| 21 | 799997 | 17080S5 | Mon Aug | 113    | S      |        | 1       | D    | 0.00001 | M      | Molar  | 4      | 1      | Colon C   | HT29     | 49.9667 |  |
| 22 | 799997 | 17080S5 | Mon Aug | 113    | S      |        | 1       | D    | 0.00001 | M      | Molar  | 4      | 17     | Colon C   | KMI2     | 60.4651 |  |
| 23 | 799997 | 17080S5 | Mon Aug | 113    | S      |        | 1       | D    | 0.00001 | M      | Molar  | 4      | 9      | Colon C   | Sw-620   | 50.6927 |  |
| 24 | 799997 | 17080S5 | Mon Aug | 113    | S      |        | 1       | D    | 0.00001 | M      | Molar  | 12     | 14     | CNS Car   | SF-268   | 94.031  |  |
| 25 | 799997 | 17080S5 | Mon Aug | 113    | S      |        | 1       | D    | 0.00001 | M      | Molar  | 12     | 15     | CNS Car   | SF-295   | 95.9248 |  |
| 26 | 799997 | 17080S5 | Mon Aug | 113    | S      |        | 1       | D    | 0.00001 | M      | Molar  | 12     | 16     | CNS Car   | SF-539   | 95.871  |  |
| 27 | 799997 | 17080S5 | Mon Aug | 113    | S      |        | 1       | D    | 0.00001 | M      | Molar  | 12     | 2      | CNS Car   | SNB-19   | 59.8714 |  |
| 28 | 799997 | 17080S5 | Mon Aug | 113    | S      |        | 1       | D    | 0.00001 | M      | Molar  | 12     | 5      | CNS Car   | SNB-75   | 89.0457 |  |
| 29 | 799997 | 17080S5 | Mon Aug | 113    | S      |        | 1       | D    | 0.00001 | M      | Molar  | 12     | 9      | CNS Car   | U251     | 67.2089 |  |
| 30 | 799997 | 17080S5 | Mon Aug | 113    | S      |        | 1       | D    | 0.00001 | M      | Molar  | 10     | 1      | Melanon   | LOX-IMV  | 49.0062 |  |
| 31 | 799997 | 17080S5 | Mon Aug | 113    | S      |        | 1       | D    | 0.00001 | M      | Molar  | 10     | 2      | Melanon   | MALME    | 112.398 |  |
| 32 | 799997 | 17080S5 | Mon Aug | 113    | S      |        | 1       | D    | 0.00001 | M      | Molar  | 10     | 14     | Melanon   | M14      | 78.4271 |  |
| 33 | 799997 | 17080S5 | Mon Aug | 113    | S      |        | 1       | D    | 0.00001 | M      | Molar  | 5      | 11     | Melanon   | MDA-MI   | 80.1436 |  |
| 34 | 799997 | 17080S5 | Mon Aug | 113    | S      |        | 1       | D    | 0.00001 | M      | Molar  | 10     | 5      | Melanon   | SK-MEL   | 85.4361 |  |
| 35 | 799997 | 17080S5 | Mon Aug | 113    | S      |        | 1       | D    | 0.00001 | M      | Molar  | 10     | 8      | Melanon   | SK-MEL   | 106.017 |  |
| 36 | 799997 | 17080S5 | Mon Aug | 113    | S      |        | 1       | D    | 0.00001 | M      | Molar  | 10     | 7      | Melanon   | SK-MEL   | 79.325  |  |
| 37 | 799997 | 17080S5 | Mon Aug | 113    | S      |        | 1       | D    | 0.00001 | M      | Molar  | 10     | 21     | Melanon   | UACC-21  | 76.077  |  |
| 38 | 799997 | 17080S5 | Mon Aug | 113    | S      |        | 1       | D    | 0.00001 | M      | Molar  | 10     | 20     | Melanon   | UACC-61  | 80.1276 |  |
| 39 | 799997 | 17080S5 | Mon Aug | 113    | S      |        | 1       | D    | 0.00001 | M      | Molar  | 6      | 10     | Ovarian ( | IGROV1   | 59.9407 |  |
| 40 | 799997 | 17080S5 | Mon Aug | 113    | S      |        | 1       | D    | 0.00001 | M      | Molar  | 6      | 1      | Ovarian ( | OVCAR-   | 70.1833 |  |
| 41 | 799997 | 17080S5 | Mon Aug | 113    | S      |        | 1       | D    | 0.00001 | M      | Molar  | 6      | 2      | Ovarian ( | OVCAR-   | 68.8713 |  |
| 42 | 799997 | 17080S5 | Mon Aug | 113    | S      |        | 1       | D    | 0.00001 | M      | Molar  | 6      | 3      | Ovarian ( | OVCAR-   | 121.728 |  |
| 43 | 799997 | 17080S5 | Mon Aug | 113    | S      |        | 1       | D    | 0.00001 | M      | Molar  | 6      | 5      | Ovarian ( | OVCAR-   | 57.2274 |  |
| 44 | 799997 | 17080S5 | Mon Aug | 113    | S      |        | 1       | D    | 0.00001 | M      | Molar  | 5      | 2      | Ovarian ( | NCI/ADF  | 79.3056 |  |
| 45 | 799997 | 17080S5 | Mon Aug | 113    | S      |        | 1       | D    | 0.00001 | M      | Molar  | 6      | 11     | Ovarian ( | SK-OV-3  | 87.9844 |  |
| 46 | 799997 | 17080S5 | Mon Aug | 113    | S      |        | 1       | D    | 0.00001 | M      | Molar  | 9      | 18     | Renal C:  | 786-0    | 87.2188 |  |
| 47 | 799997 | 17080S5 | Mon Aug | 113    | S      |        | 1       | D    | 0.00001 | M      | Molar  | 9      | 13     | Renal C:  | A498     | 100.791 |  |
| 48 | 799997 | 17080S5 | Mon Aug | 113    | S      |        | 1       | D    | 0.00001 | M      | Molar  | 9      | 23     | Renal C:  | ACHN     | 68.1073 |  |
| 49 | 799997 | 17080S5 | Mon Aug | 113    | S      |        | 1       | D    | 0.00001 | M      | Molar  | 9      | 15     | Renal C:  | CAKI-1   | 79.3708 |  |
| 50 | 799997 | 17080S5 | Mon Aug | 113    | S      |        | 1       | D    | 0.00001 | M      | Molar  | 9      | 16     | Renal C:  | RXF 393  | 101.925 |  |
| 51 | 799997 | 17080S5 | Mon Aug | 113    | S      |        | 1       | D    | 0.00001 | M      | Molar  | 9      | 8      | Renal C:  | SN12C    | 57.6682 |  |
| 52 | 799997 | 17080S5 | Mon Aug | 113    | S      |        | 1       | D    | 0.00001 | M      | Molar  | 9      | 24     | Renal C:  | TK-10    | 101.241 |  |
| 53 | 799997 | 17080S5 | Mon Aug | 113    | S      |        | 1       | D    | 0.00001 | M      | Molar  | 9      | 4      | Renal C:  | UO-31    | 58.3531 |  |
| 54 | 799997 | 17080S5 | Mon Aug | 113    | S      |        | 1       | D    | 0.00001 | M      | Molar  | 11     | 1      | Prostate  | PC-3     | 51.3971 |  |
| 55 | 799997 | 17080S5 | Mon Aug | 113    | S      |        | 1       | D    | 0.00001 | M      | Molar  | 11     | 3      | Prostate  | DU-145   | 105.611 |  |
| 56 | 799997 | 17080S5 | Mon Aug | 113    | S      |        | 1       | D    | 0.00001 | M      | Molar  | 5      | 1      | Breast C  | MCF7     | 34.6834 |  |
| 57 | 799997 | 17080S5 | Mon Aug | 113    | S      |        | 1       | D    | 0.00001 | M      | Molar  | 5      | 5      | Breast C  | MDA-MI   | 94.4986 |  |
| 58 | 799997 | 17080S5 | Mon Aug | 113    | S      |        | 1       | D    | 0.00001 | M      | Molar  | 5      | 6      | Breast C  | HS 578T  | 91.2629 |  |
| 59 | 799997 | 17080S5 | Mon Aug | 113    | S      |        | 1       | D    | 0.00001 | M      | Molar  | 5      | 13     | Breast C  | BT-549   | 66.4165 |  |
| 60 | 799997 | 17080S5 | Mon Aug | 113    | S      |        | 1       | D    | 0.00001 | M      | Molar  | 5      | 14     | Breast C  | T-47D    | 74.4048 |  |
| 61 | 799997 | 17080S5 | Mon Aug | 113    | S      |        | 1       | D    | 0.00001 | M      | Molar  | 5      | 18     | Breast C  | MDA-MI   | 46.475  |  |
| 62 |        |         |         |        |        |        |         |      |         |        |        |        |        |           |          |         |  |
| 63 |        |         |         |        |        |        |         |      |         |        |        |        |        |           |          |         |  |
| 64 |        |         |         |        |        |        |         |      |         |        |        |        |        |           |          |         |  |

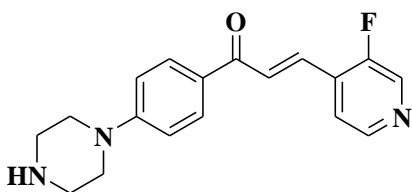

Vf

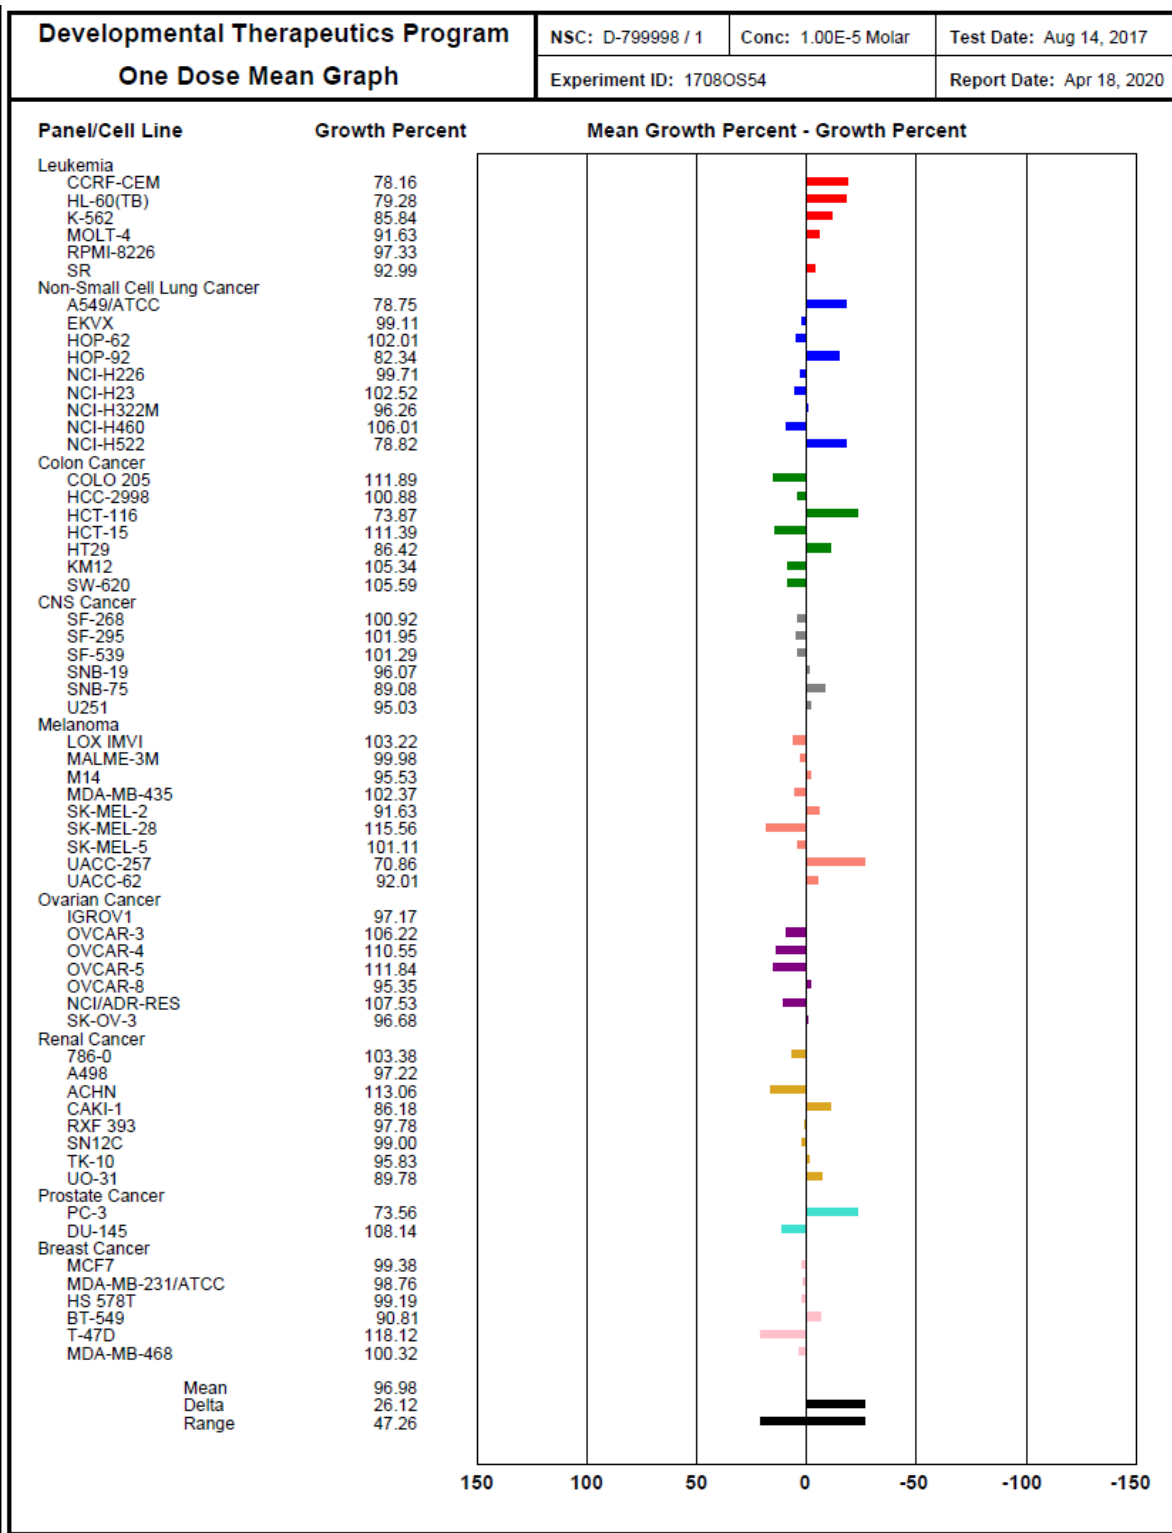

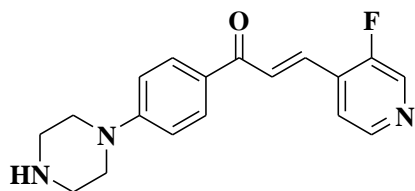

Vf

| NSC |        |         |         |        |        |        |         |         |        |        |        |        |           |          |         |
|-----|--------|---------|---------|--------|--------|--------|---------|---------|--------|--------|--------|--------|-----------|----------|---------|
| A   | B      | C       | D       | E      | F      | G      | H       | I       | J      | K      | L      | M      | N         | O        | P       |
| 1   | NSC    | EXPID   | PLANDA  | TESTSE | PREFIX | SAMPLE | DISCREI | CONC    | CONCUI | CONCUI | PANELN | CELLNB | PANELN    | CELLNA   | GIPRCNT |
| 2   | 799998 | 1708055 | Mon Aug | 123    | S      | 1      | D       | 0.00001 | M      | Molar  | 7      | 3      | Leukemi.  | CCRF-C   | 78.1606 |
| 3   | 799998 | 1708055 | Mon Aug | 123    | S      | 1      | D       | 0.00001 | M      | Molar  | 7      | 8      | Leukemi.  | HL-60(TE | 79.2846 |
| 4   | 799998 | 1708055 | Mon Aug | 123    | S      | 1      | D       | 0.00001 | M      | Molar  | 7      | 5      | Leukemi.  | K-562    | 85.836  |
| 5   | 799998 | 1708055 | Mon Aug | 123    | S      | 1      | D       | 0.00001 | M      | Molar  | 7      | 6      | Leukemi.  | MOLT-4   | 91.6312 |
| 6   | 799998 | 1708055 | Mon Aug | 123    | S      | 1      | D       | 0.00001 | M      | Molar  | 7      | 10     | Leukemi.  | RPMI-82  | 97.3264 |
| 7   | 799998 | 1708055 | Mon Aug | 123    | S      | 1      | D       | 0.00001 | M      | Molar  | 7      | 19     | Leukemi.  | SR       | 92.9947 |
| 8   | 799998 | 1708055 | Mon Aug | 123    | S      | 1      | D       | 0.00001 | M      | Molar  | 1      | 4      | Non-Sm.   | A549(AT  | 78.7503 |
| 9   | 799998 | 1708055 | Mon Aug | 123    | S      | 1      | D       | 0.00001 | M      | Molar  | 1      | 8      | Non-Sm.   | EKVX     | 99.1057 |
| 10  | 799998 | 1708055 | Mon Aug | 123    | S      | 1      | D       | 0.00001 | M      | Molar  | 1      | 26     | Non-Sm.   | HOP-62   | 102.011 |
| 11  | 799998 | 1708055 | Mon Aug | 123    | S      | 1      | D       | 0.00001 | M      | Molar  | 1      | 29     | Non-Sm.   | HOP-92   | 82.3412 |
| 12  | 799998 | 1708055 | Mon Aug | 123    | S      | 1      | D       | 0.00001 | M      | Molar  | 1      | 13     | Non-Sm.   | NCH-H22  | 99.713  |
| 13  | 799998 | 1708055 | Mon Aug | 123    | S      | 1      | D       | 0.00001 | M      | Molar  | 1      | 1      | Non-Sm.   | NCI-H23  | 102.517 |
| 14  | 799998 | 1708055 | Mon Aug | 123    | S      | 1      | D       | 0.00001 | M      | Molar  | 1      | 17     | Non-Sm.   | NCI-H32  | 96.2614 |
| 15  | 799998 | 1708055 | Mon Aug | 123    | S      | 1      | D       | 0.00001 | M      | Molar  | 1      | 21     | Non-Sm.   | NCI-H46  | 106.014 |
| 16  | 799998 | 1708055 | Mon Aug | 123    | S      | 1      | D       | 0.00001 | M      | Molar  | 1      | 3      | Non-Sm.   | NCI-H52  | 78.8167 |
| 17  | 799998 | 1708055 | Mon Aug | 123    | S      | 1      | D       | 0.00001 | M      | Molar  | 4      | 10     | Colon C.  | COLO 20  | 111.888 |
| 18  | 799998 | 1708055 | Mon Aug | 123    | S      | 1      | D       | 0.00001 | M      | Molar  | 4      | 2      | Colon C.  | HCC-29C  | 100.88  |
| 19  | 799998 | 1708055 | Mon Aug | 123    | S      | 1      | D       | 0.00001 | M      | Molar  | 4      | 3      | Colon C.  | HCT-116  | 73.8715 |
| 20  | 799998 | 1708055 | Mon Aug | 123    | S      | 1      | D       | 0.00001 | M      | Molar  | 4      | 15     | Colon C.  | HCT-15   | 111.394 |
| 21  | 799998 | 1708055 | Mon Aug | 123    | S      | 1      | D       | 0.00001 | M      | Molar  | 4      | 1      | Colon C.  | HT29     | 86.4204 |
| 22  | 799998 | 1708055 | Mon Aug | 123    | S      | 1      | D       | 0.00001 | M      | Molar  | 4      | 17     | Colon C.  | KM12     | 105.342 |
| 23  | 799998 | 1708055 | Mon Aug | 123    | S      | 1      | D       | 0.00001 | M      | Molar  | 4      | 9      | Colon C.  | SW-620   | 105.588 |
| 24  | 799998 | 1708055 | Mon Aug | 123    | S      | 1      | D       | 0.00001 | M      | Molar  | 12     | 14     | CNS Car   | SF-268   | 100.919 |
| 25  | 799998 | 1708055 | Mon Aug | 123    | S      | 1      | D       | 0.00001 | M      | Molar  | 12     | 15     | CNS Car   | SF-295   | 101.945 |
| 26  | 799998 | 1708055 | Mon Aug | 123    | S      | 1      | D       | 0.00001 | M      | Molar  | 12     | 16     | CNS Car   | SF-539   | 101.294 |
| 27  | 799998 | 1708055 | Mon Aug | 123    | S      | 1      | D       | 0.00001 | M      | Molar  | 12     | 2      | CNS Car   | SNB-19   | 96.0684 |
| 28  | 799998 | 1708055 | Mon Aug | 123    | S      | 1      | D       | 0.00001 | M      | Molar  | 12     | 5      | CNS Car   | SNB-75   | 89.0759 |
| 29  | 799998 | 1708055 | Mon Aug | 123    | S      | 1      | D       | 0.00001 | M      | Molar  | 12     | 9      | CNS Car   | U251     | 95.0339 |
| 30  | 799998 | 1708055 | Mon Aug | 123    | S      | 1      | D       | 0.00001 | M      | Molar  | 10     | 1      | Melanon   | LOX IMV  | 103.218 |
| 31  | 799998 | 1708055 | Mon Aug | 123    | S      | 1      | D       | 0.00001 | M      | Molar  | 10     | 2      | Melanon   | MALME    | 99.98   |
| 32  | 799998 | 1708055 | Mon Aug | 123    | S      | 1      | D       | 0.00001 | M      | Molar  | 10     | 14     | Melanon   | M14      | 95.5348 |
| 33  | 799998 | 1708055 | Mon Aug | 123    | S      | 1      | D       | 0.00001 | M      | Molar  | 5      | 11     | Melanon   | MDA-MI   | 102.373 |
| 34  | 799998 | 1708055 | Mon Aug | 123    | S      | 1      | D       | 0.00001 | M      | Molar  | 10     | 5      | Melanon   | SK-MEL   | 91.6318 |
| 35  | 799998 | 1708055 | Mon Aug | 123    | S      | 1      | D       | 0.00001 | M      | Molar  | 10     | 8      | Melanon   | SK-MEL   | 115.561 |
| 36  | 799998 | 1708055 | Mon Aug | 123    | S      | 1      | D       | 0.00001 | M      | Molar  | 10     | 7      | Melanon   | SK-MEL   | 101.113 |
| 37  | 799998 | 1708055 | Mon Aug | 123    | S      | 1      | D       | 0.00001 | M      | Molar  | 10     | 21     | Melanon   | UACC-2   | 70.8639 |
| 38  | 799998 | 1708055 | Mon Aug | 123    | S      | 1      | D       | 0.00001 | M      | Molar  | 10     | 20     | Melanon   | UACC-6   | 92.014  |
| 39  | 799998 | 1708055 | Mon Aug | 123    | S      | 1      | D       | 0.00001 | M      | Molar  | 6      | 10     | Ovarian ( | IGROW1   | 97.1688 |
| 40  | 799998 | 1708055 | Mon Aug | 123    | S      | 1      | D       | 0.00001 | M      | Molar  | 6      | 1      | Ovarian ( | OVCAR-   | 106.217 |
| 41  | 799998 | 1708055 | Mon Aug | 123    | S      | 1      | D       | 0.00001 | M      | Molar  | 6      | 2      | Ovarian ( | OVCAR-   | 110.546 |
| 42  | 799998 | 1708055 | Mon Aug | 123    | S      | 1      | D       | 0.00001 | M      | Molar  | 6      | 3      | Ovarian ( | OVCAR-   | 111.843 |
| 43  | 799998 | 1708055 | Mon Aug | 123    | S      | 1      | D       | 0.00001 | M      | Molar  | 6      | 5      | Ovarian ( | OVCAR-   | 95.3451 |
| 44  | 799998 | 1708055 | Mon Aug | 123    | S      | 1      | D       | 0.00001 | M      | Molar  | 5      | 2      | Ovarian ( | NCIMADP  | 107.526 |
| 45  | 799998 | 1708055 | Mon Aug | 123    | S      | 1      | D       | 0.00001 | M      | Molar  | 6      | 11     | Ovarian ( | SK-OV-3  | 96.685  |
| 46  | 799998 | 1708055 | Mon Aug | 123    | S      | 1      | D       | 0.00001 | M      | Molar  | 9      | 18     | Renal C   | 786-0    | 103.378 |
| 47  | 799998 | 1708055 | Mon Aug | 123    | S      | 1      | D       | 0.00001 | M      | Molar  | 9      | 13     | Renal C   | A498     | 97.2198 |
| 48  | 799998 | 1708055 | Mon Aug | 123    | S      | 1      | D       | 0.00001 | M      | Molar  | 9      | 23     | Renal C   | ACHN     | 113.064 |
| 49  | 799998 | 1708055 | Mon Aug | 123    | S      | 1      | D       | 0.00001 | M      | Molar  | 9      | 15     | Renal C   | CAKI-1   | 86.1807 |
| 50  | 799998 | 1708055 | Mon Aug | 123    | S      | 1      | D       | 0.00001 | M      | Molar  | 9      | 16     | Renal C   | RXF 393  | 97.7834 |
| 51  | 799998 | 1708055 | Mon Aug | 123    | S      | 1      | D       | 0.00001 | M      | Molar  | 9      | 8      | Renal C   | SNI2C    | 99.0019 |
| 52  | 799998 | 1708055 | Mon Aug | 123    | S      | 1      | D       | 0.00001 | M      | Molar  | 9      | 24     | Renal C   | TK-10    | 95.834  |
| 53  | 799998 | 1708055 | Mon Aug | 123    | S      | 1      | D       | 0.00001 | M      | Molar  | 9      | 4      | Renal C   | UD-31    | 89.7822 |
| 54  | 799998 | 1708055 | Mon Aug | 123    | S      | 1      | D       | 0.00001 | M      | Molar  | 11     | 1      | Prostate  | PC-3     | 73.5632 |
| 55  | 799998 | 1708055 | Mon Aug | 123    | S      | 1      | D       | 0.00001 | M      | Molar  | 11     | 3      | Prostate  | DU-145   | 108.144 |
| 56  | 799998 | 1708055 | Mon Aug | 123    | S      | 1      | D       | 0.00001 | M      | Molar  | 5      | 1      | Breast C  | MCF7     | 99.378  |
| 57  | 799998 | 1708055 | Mon Aug | 123    | S      | 1      | D       | 0.00001 | M      | Molar  | 5      | 5      | Breast C  | MDA-MI   | 98.7594 |
| 58  | 799998 | 1708055 | Mon Aug | 123    | S      | 1      | D       | 0.00001 | M      | Molar  | 5      | 6      | Breast C  | HS 578T  | 99.1854 |
| 59  | 799998 | 1708055 | Mon Aug | 123    | S      | 1      | D       | 0.00001 | M      | Molar  | 5      | 13     | Breast C  | BT-549   | 90.8091 |
| 60  | 799998 | 1708055 | Mon Aug | 123    | S      | 1      | D       | 0.00001 | M      | Molar  | 5      | 14     | Breast C  | T-47D    | 118.118 |
| 61  | 799998 | 1708055 | Mon Aug | 123    | S      | 1      | D       | 0.00001 | M      | Molar  | 5      | 18     | Breast C  | MDA-MI   | 100.323 |
| 62  |        |         |         |        |        |        |         |         |        |        |        |        |           |          |         |
| 63  |        |         |         |        |        |        |         |         |        |        |        |        |           |          |         |



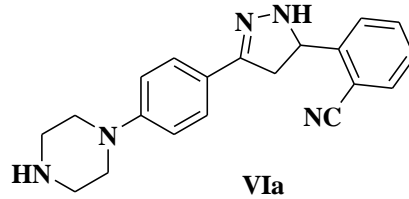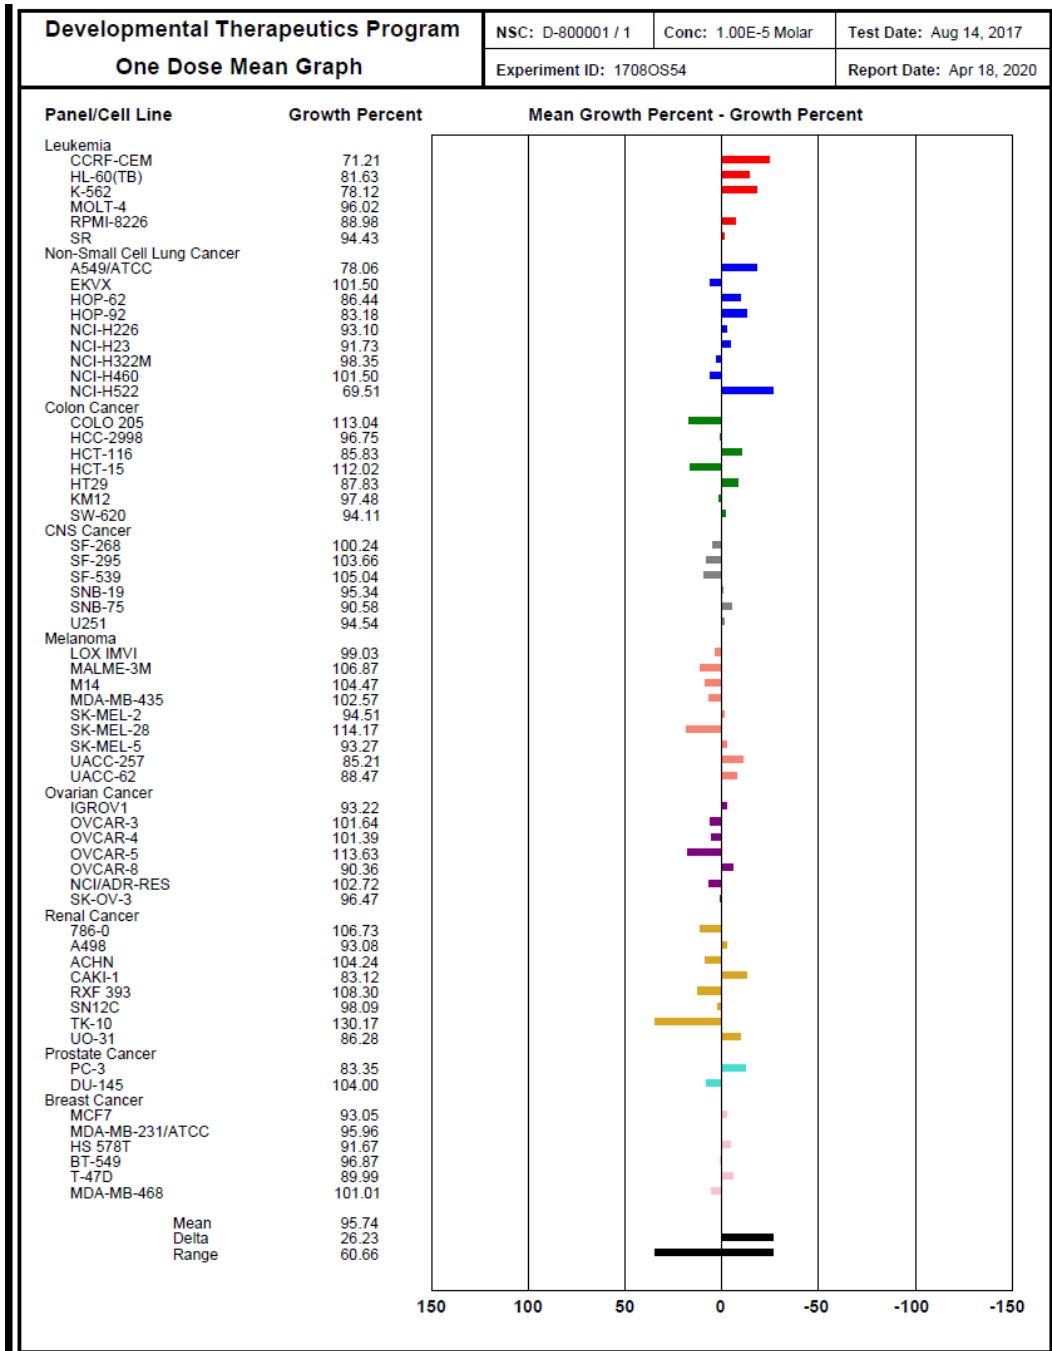

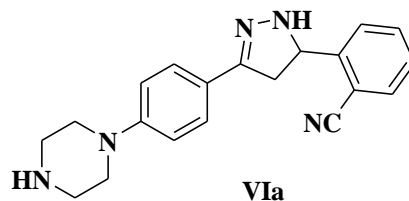

| A1 |        |         |          |        |        |        |         | NSC     |        |        |        |        |                              |         |   |   |  |
|----|--------|---------|----------|--------|--------|--------|---------|---------|--------|--------|--------|--------|------------------------------|---------|---|---|--|
|    | A      | B       | C        | D      | E      | F      | G       | H       | I      | J      | K      | L      | M                            | N       | O | P |  |
|    | NSC    | EXPID   | PLANDATE | TESTSE | PREFIX | SAMPLE | DISCREI | CONC    | CONCUT | PANELA | CELLNB | PANELM | CELLNA                       | GIPRCNT |   |   |  |
| 2  | 800001 | 1708OS5 | Mon Aug  | 153    | S      |        | 1 D     | 0.00001 | M      | Molar  | 7      | 3      | Leukemi. CCRF-C              | 71.2122 |   |   |  |
| 3  | 800001 | 1708OS5 | Mon Aug  | 153    | S      |        | 1 D     | 0.00001 | M      | Molar  | 7      | 8      | Leukemi. HL-60(TE            | 81.6321 |   |   |  |
| 4  | 800001 | 1708OS5 | Mon Aug  | 153    | S      |        | 1 D     | 0.00001 | M      | Molar  | 7      | 5      | Leukemi. K-562               | 78.1181 |   |   |  |
| 5  | 800001 | 1708OS5 | Mon Aug  | 153    | S      |        | 1 D     | 0.00001 | M      | Molar  | 7      | 6      | Leukemi. MOLT-4              | 96.0205 |   |   |  |
| 6  | 800001 | 1708OS5 | Mon Aug  | 153    | S      |        | 1 D     | 0.00001 | M      | Molar  | 7      | 10     | Leukemi. RPMI-82             | 88.9759 |   |   |  |
| 7  | 800001 | 1708OS5 | Mon Aug  | 153    | S      |        | 1 D     | 0.00001 | M      | Molar  | 7      | 19     | Leukemi. SF                  | 94.4288 |   |   |  |
| 8  | 800001 | 1708OS5 | Mon Aug  | 153    | S      |        | 1 D     | 0.00001 | M      | Molar  | 1      | 4      | Non-Sm. A549/AT              | 78.0557 |   |   |  |
| 9  | 800001 | 1708OS5 | Mon Aug  | 153    | S      |        | 1 D     | 0.00001 | M      | Molar  | 1      | 8      | Non-Sm. EKVX                 | 101.498 |   |   |  |
| 10 | 800001 | 1708OS5 | Mon Aug  | 153    | S      |        | 1 D     | 0.00001 | M      | Molar  | 1      | 26     | Non-Sm. HOP-62               | 86.4428 |   |   |  |
| 11 | 800001 | 1708OS5 | Mon Aug  | 153    | S      |        | 1 D     | 0.00001 | M      | Molar  | 1      | 29     | Non-Sm. HOP-92               | 83.1833 |   |   |  |
| 12 | 800001 | 1708OS5 | Mon Aug  | 153    | S      |        | 1 D     | 0.00001 | M      | Molar  | 1      | 13     | Non-Sm. NCI-H22              | 93.0984 |   |   |  |
| 13 | 800001 | 1708OS5 | Mon Aug  | 153    | S      |        | 1 D     | 0.00001 | M      | Molar  | 1      | 1      | Non-Sm. NCI-H23              | 91.7293 |   |   |  |
| 14 | 800001 | 1708OS5 | Mon Aug  | 153    | S      |        | 1 D     | 0.00001 | M      | Molar  | 1      | 17     | Non-Sm. NCI-H32              | 98.3467 |   |   |  |
| 15 | 800001 | 1708OS5 | Mon Aug  | 153    | S      |        | 1 D     | 0.00001 | M      | Molar  | 1      | 21     | Non-Sm. NCI-H46              | 101.504 |   |   |  |
| 16 | 800001 | 1708OS5 | Mon Aug  | 153    | S      |        | 1 D     | 0.00001 | M      | Molar  | 1      | 3      | Non-Sm. NCI-H52              | 69.5058 |   |   |  |
| 17 | 800001 | 1708OS5 | Mon Aug  | 153    | S      |        | 1 D     | 0.00001 | M      | Molar  | 4      | 10     | Colon C. COLO 20             | 113.037 |   |   |  |
| 18 | 800001 | 1708OS5 | Mon Aug  | 153    | S      |        | 1 D     | 0.00001 | M      | Molar  | 4      | 2      | Colon C. HCC-29C             | 96.7456 |   |   |  |
| 19 | 800001 | 1708OS5 | Mon Aug  | 153    | S      |        | 1 D     | 0.00001 | M      | Molar  | 4      | 3      | Colon C. HCT-116             | 85.8348 |   |   |  |
| 20 | 800001 | 1708OS5 | Mon Aug  | 153    | S      |        | 1 D     | 0.00001 | M      | Molar  | 4      | 15     | Colon C. HCT-15              | 112.025 |   |   |  |
| 21 | 800001 | 1708OS5 | Mon Aug  | 153    | S      |        | 1 D     | 0.00001 | M      | Molar  | 4      | 1      | Colon C. HT29                | 87.8292 |   |   |  |
| 22 | 800001 | 1708OS5 | Mon Aug  | 153    | S      |        | 1 D     | 0.00001 | M      | Molar  | 4      | 17     | Colon C. KM12                | 97.48   |   |   |  |
| 23 | 800001 | 1708OS5 | Mon Aug  | 153    | S      |        | 1 D     | 0.00001 | M      | Molar  | 4      | 9      | Colon C. SW-620              | 94.1092 |   |   |  |
| 24 | 800001 | 1708OS5 | Mon Aug  | 153    | S      |        | 1 D     | 0.00001 | M      | Molar  | 12     | 14     | CNS Car. SF-268              | 100.243 |   |   |  |
| 25 | 800001 | 1708OS5 | Mon Aug  | 153    | S      |        | 1 D     | 0.00001 | M      | Molar  | 12     | 15     | CNS Car. SF-295              | 103.663 |   |   |  |
| 26 | 800001 | 1708OS5 | Mon Aug  | 153    | S      |        | 1 D     | 0.00001 | M      | Molar  | 12     | 16     | CNS Car. SF-539              | 105.041 |   |   |  |
| 27 | 800001 | 1708OS5 | Mon Aug  | 153    | S      |        | 1 D     | 0.00001 | M      | Molar  | 12     | 2      | CNS Car. SNB-19              | 95.3413 |   |   |  |
| 28 | 800001 | 1708OS5 | Mon Aug  | 153    | S      |        | 1 D     | 0.00001 | M      | Molar  | 12     | 5      | CNS Car. SNB-75              | 90.5763 |   |   |  |
| 29 | 800001 | 1708OS5 | Mon Aug  | 153    | S      |        | 1 D     | 0.00001 | M      | Molar  | 12     | 9      | CNS Car. U251                | 94.5448 |   |   |  |
| 30 | 800001 | 1708OS5 | Mon Aug  | 153    | S      |        | 1 D     | 0.00001 | M      | Molar  | 10     | 1      | Melanon. LOX IMV             | 99.0253 |   |   |  |
| 31 | 800001 | 1708OS5 | Mon Aug  | 153    | S      |        | 1 D     | 0.00001 | M      | Molar  | 10     | 2      | Melanon. MALME               | 106.868 |   |   |  |
| 32 | 800001 | 1708OS5 | Mon Aug  | 153    | S      |        | 1 D     | 0.00001 | M      | Molar  | 10     | 14     | Melanon. M14                 | 104.469 |   |   |  |
| 33 | 800001 | 1708OS5 | Mon Aug  | 153    | S      |        | 1 D     | 0.00001 | M      | Molar  | 5      | 11     | Melanon. MDA-MI              | 102.568 |   |   |  |
| 34 | 800001 | 1708OS5 | Mon Aug  | 153    | S      |        | 1 D     | 0.00001 | M      | Molar  | 10     | 5      | Melanon. SK-MEL              | 94.5115 |   |   |  |
| 35 | 800001 | 1708OS5 | Mon Aug  | 153    | S      |        | 1 D     | 0.00001 | M      | Molar  | 10     | 8      | Melanon. SK-MEL              | 114.171 |   |   |  |
| 36 | 800001 | 1708OS5 | Mon Aug  | 153    | S      |        | 1 D     | 0.00001 | M      | Molar  | 10     | 7      | Melanon. SK-MEL              | 93.2679 |   |   |  |
| 37 | 800001 | 1708OS5 | Mon Aug  | 153    | S      |        | 1 D     | 0.00001 | M      | Molar  | 10     | 21     | Melanon. UACC-2              | 85.2072 |   |   |  |
| 38 | 800001 | 1708OS5 | Mon Aug  | 153    | S      |        | 1 D     | 0.00001 | M      | Molar  | 10     | 20     | Melanon. UACC-6              | 88.4675 |   |   |  |
| 39 | 800001 | 1708OS5 | Mon Aug  | 153    | S      |        | 1 D     | 0.00001 | M      | Molar  | 6      | 10     | Ovarian ( IGROV1             | 93.2241 |   |   |  |
| 40 | 800001 | 1708OS5 | Mon Aug  | 153    | S      |        | 1 D     | 0.00001 | M      | Molar  | 6      | 1      | Ovarian ( OVCAR-             | 101.644 |   |   |  |
| 41 | 800001 | 1708OS5 | Mon Aug  | 153    | S      |        | 1 D     | 0.00001 | M      | Molar  | 6      | 2      | Ovarian ( OVCAR-             | 101.389 |   |   |  |
| 42 | 800001 | 1708OS5 | Mon Aug  | 153    | S      |        | 1 D     | 0.00001 | M      | Molar  | 6      | 3      | Ovarian ( OVCAR-             | 113.627 |   |   |  |
| 43 | 800001 | 1708OS5 | Mon Aug  | 153    | S      |        | 1 D     | 0.00001 | M      | Molar  | 6      | 5      | Ovarian ( OVCAR-             | 90.3568 |   |   |  |
| 44 | 800001 | 1708OS5 | Mon Aug  | 153    | S      |        | 1 D     | 0.00001 | M      | Molar  | 5      | 2      | Ovarian ( NCI/ADF            | 102.721 |   |   |  |
| 45 | 800001 | 1708OS5 | Mon Aug  | 153    | S      |        | 1 D     | 0.00001 | M      | Molar  | 6      | 11     | Ovarian ( SK-OV-3            | 96.4726 |   |   |  |
| 46 | 800001 | 1708OS5 | Mon Aug  | 153    | S      |        | 1 D     | 0.00001 | M      | Molar  | 9      | 18     | Renal C <sub>2</sub> 786-0   | 106.733 |   |   |  |
| 47 | 800001 | 1708OS5 | Mon Aug  | 153    | S      |        | 1 D     | 0.00001 | M      | Molar  | 9      | 13     | Renal C <sub>2</sub> A498    | 93.0829 |   |   |  |
| 48 | 800001 | 1708OS5 | Mon Aug  | 153    | S      |        | 1 D     | 0.00001 | M      | Molar  | 9      | 23     | Renal C <sub>2</sub> ACHN    | 104.241 |   |   |  |
| 49 | 800001 | 1708OS5 | Mon Aug  | 153    | S      |        | 1 D     | 0.00001 | M      | Molar  | 9      | 15     | Renal C <sub>2</sub> CAKI-1  | 83.1227 |   |   |  |
| 50 | 800001 | 1708OS5 | Mon Aug  | 153    | S      |        | 1 D     | 0.00001 | M      | Molar  | 9      | 16     | Renal C <sub>2</sub> RXF 393 | 108.304 |   |   |  |
| 51 | 800001 | 1708OS5 | Mon Aug  | 153    | S      |        | 1 D     | 0.00001 | M      | Molar  | 9      | 8      | Renal C <sub>2</sub> SN12C   | 98.0871 |   |   |  |
| 52 | 800001 | 1708OS5 | Mon Aug  | 153    | S      |        | 1 D     | 0.00001 | M      | Molar  | 9      | 24     | Renal C <sub>2</sub> TK-10   | 130.172 |   |   |  |
| 53 | 800001 | 1708OS5 | Mon Aug  | 153    | S      |        | 1 D     | 0.00001 | M      | Molar  | 9      | 4      | Renal C <sub>2</sub> UO-31   | 86.2805 |   |   |  |
| 54 | 800001 | 1708OS5 | Mon Aug  | 153    | S      |        | 1 D     | 0.00001 | M      | Molar  | 11     | 1      | Prostate. PC-3               | 83.346  |   |   |  |
| 55 | 800001 | 1708OS5 | Mon Aug  | 153    | S      |        | 1 D     | 0.00001 | M      | Molar  | 11     | 3      | Prostate. DU-145             | 104     |   |   |  |
| 56 | 800001 | 1708OS5 | Mon Aug  | 153    | S      |        | 1 D     | 0.00001 | M      | Molar  | 5      | 1      | Breast C. MCF7               | 93.0491 |   |   |  |
| 57 | 800001 | 1708OS5 | Mon Aug  | 153    | S      |        | 1 D     | 0.00001 | M      | Molar  | 5      | 5      | Breast C. MDA-MI             | 95.9613 |   |   |  |
| 58 | 800001 | 1708OS5 | Mon Aug  | 153    | S      |        | 1 D     | 0.00001 | M      | Molar  | 5      | 6      | Breast C. HS 578T            | 91.6742 |   |   |  |
| 59 | 800001 | 1708OS5 | Mon Aug  | 153    | S      |        | 1 D     | 0.00001 | M      | Molar  | 5      | 13     | Breast C. BT-549             | 96.8658 |   |   |  |
| 60 | 800001 | 1708OS5 | Mon Aug  | 153    | S      |        | 1 D     | 0.00001 | M      | Molar  | 5      | 14     | Breast C. T-47D              | 89.9887 |   |   |  |
| 61 | 800001 | 1708OS5 | Mon Aug  | 153    | S      |        | 1 D     | 0.00001 | M      | Molar  | 5      | 18     | Breast C. MDA-MI             | 101.01  |   |   |  |
| 62 |        |         |          |        |        |        |         |         |        |        |        |        |                              |         |   |   |  |

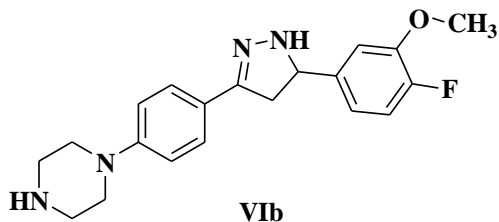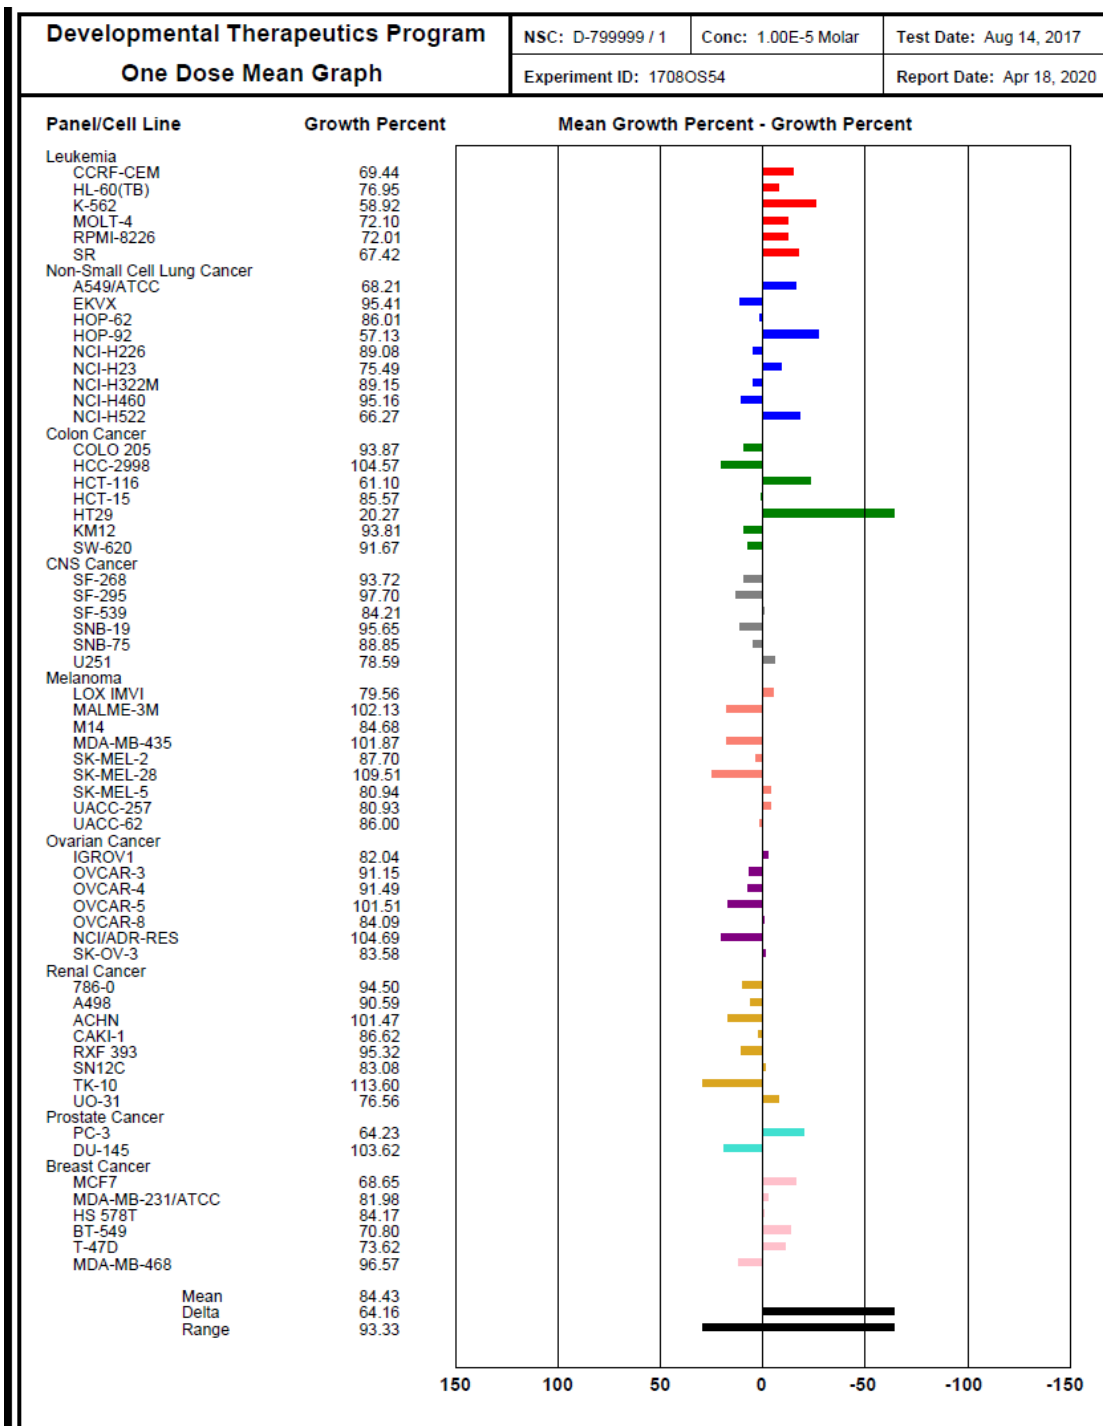

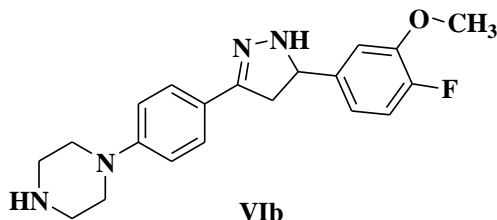

| NSC |        |         |         |        |        |        |         |         |        |        |        |        |                              |         |         |
|-----|--------|---------|---------|--------|--------|--------|---------|---------|--------|--------|--------|--------|------------------------------|---------|---------|
| A   | B      | C       | D       | E      | F      | G      | H       | I       | J      | K      | L      | M      | N                            | O       | P       |
| 1   | NSC    | EXPID   | PLAND   | TESTSE | PREFIX | SAMPLE | DISCREI | CONC    | CONCUI | CONCUI | PANELN | CELLNB | PANELM                       | CELLNA  | GIPRCNT |
| 2   | 799999 | 1708DS5 | Mon Aug | 133    | S      | 1      | D       | 0.00001 | M      | Molar  | 7      | 3      | Leukemi-CCRF-C               | 69.4377 |         |
| 3   | 799999 | 1708DS5 | Mon Aug | 133    | S      | 1      | D       | 0.00001 | M      | Molar  | 7      | 8      | Leukemi-HL-60(T              | 76.9489 |         |
| 4   | 799999 | 1708DS5 | Mon Aug | 133    | S      | 1      | D       | 0.00001 | M      | Molar  | 7      | 5      | Leukemi-K-562                | 58.915  |         |
| 5   | 799999 | 1708DS5 | Mon Aug | 133    | S      | 1      | D       | 0.00001 | M      | Molar  | 7      | 6      | Leukemi-MOLT-4               | 72.1014 |         |
| 6   | 799999 | 1708DS5 | Mon Aug | 133    | S      | 1      | D       | 0.00001 | M      | Molar  | 7      | 10     | Leukemi-RPMI-82              | 72.0067 |         |
| 7   | 799999 | 1708DS5 | Mon Aug | 133    | S      | 1      | D       | 0.00001 | M      | Molar  | 7      | 19     | Leukemi-SR                   | 67.4222 |         |
| 8   | 799999 | 1708DS5 | Mon Aug | 133    | S      | 1      | D       | 0.00001 | M      | Molar  | 1      | 4      | Non-Sm-A549/AT               | 68.2079 |         |
| 9   | 799999 | 1708DS5 | Mon Aug | 133    | S      | 1      | D       | 0.00001 | M      | Molar  | 1      | 8      | Non-Sm-EKVX                  | 95.4054 |         |
| 10  | 799999 | 1708DS5 | Mon Aug | 133    | S      | 1      | D       | 0.00001 | M      | Molar  | 1      | 26     | Non-Sm-HOP-62                | 86.0135 |         |
| 11  | 799999 | 1708DS5 | Mon Aug | 133    | S      | 1      | D       | 0.00001 | M      | Molar  | 1      | 29     | Non-Sm-HOP-92                | 57.1292 |         |
| 12  | 799999 | 1708DS5 | Mon Aug | 133    | S      | 1      | D       | 0.00001 | M      | Molar  | 1      | 13     | Non-Sm-NCI-H22               | 89.0776 |         |
| 13  | 799999 | 1708DS5 | Mon Aug | 133    | S      | 1      | D       | 0.00001 | M      | Molar  | 1      | 1      | Non-Sm-NCI-H23               | 75.4886 |         |
| 14  | 799999 | 1708DS5 | Mon Aug | 133    | S      | 1      | D       | 0.00001 | M      | Molar  | 1      | 17     | Non-Sm-NCI-H32               | 89.1519 |         |
| 15  | 799999 | 1708DS5 | Mon Aug | 133    | S      | 1      | D       | 0.00001 | M      | Molar  | 1      | 21     | Non-Sm-NCI-H46               | 95.1636 |         |
| 16  | 799999 | 1708DS5 | Mon Aug | 133    | S      | 1      | D       | 0.00001 | M      | Molar  | 1      | 3      | Non-Sm-NCI-H52               | 66.2655 |         |
| 17  | 799999 | 1708DS5 | Mon Aug | 133    | S      | 1      | D       | 0.00001 | M      | Molar  | 4      | 10     | Colon C-COLO 20              | 93.8722 |         |
| 18  | 799999 | 1708DS5 | Mon Aug | 133    | S      | 1      | D       | 0.00001 | M      | Molar  | 4      | 2      | Colon C-HCC-29               | 104.565 |         |
| 19  | 799999 | 1708DS5 | Mon Aug | 133    | S      | 1      | D       | 0.00001 | M      | Molar  | 4      | 3      | Colon C-HCT-116              | 61.1043 |         |
| 20  | 799999 | 1708DS5 | Mon Aug | 133    | S      | 1      | D       | 0.00001 | M      | Molar  | 4      | 15     | Colon C-HCT-15               | 85.5705 |         |
| 21  | 799999 | 1708DS5 | Mon Aug | 133    | S      | 1      | D       | 0.00001 | M      | Molar  | 4      | 1      | Colon C-HT29                 | 20.2691 |         |
| 22  | 799999 | 1708DS5 | Mon Aug | 133    | S      | 1      | D       | 0.00001 | M      | Molar  | 4      | 17     | Colon C-KM12                 | 93.8055 |         |
| 23  | 799999 | 1708DS5 | Mon Aug | 133    | S      | 1      | D       | 0.00001 | M      | Molar  | 4      | 9      | Colon C-Sw-620               | 91.6712 |         |
| 24  | 799999 | 1708DS5 | Mon Aug | 133    | S      | 1      | D       | 0.00001 | M      | Molar  | 12     | 14     | CNS Car SF-268               | 93.7175 |         |
| 25  | 799999 | 1708DS5 | Mon Aug | 133    | S      | 1      | D       | 0.00001 | M      | Molar  | 12     | 15     | CNS Car SF-295               | 97.695  |         |
| 26  | 799999 | 1708DS5 | Mon Aug | 133    | S      | 1      | D       | 0.00001 | M      | Molar  | 12     | 16     | CNS Car SF-539               | 84.2062 |         |
| 27  | 799999 | 1708DS5 | Mon Aug | 133    | S      | 1      | D       | 0.00001 | M      | Molar  | 12     | 2      | CNS Car SNB-19               | 95.6468 |         |
| 28  | 799999 | 1708DS5 | Mon Aug | 133    | S      | 1      | D       | 0.00001 | M      | Molar  | 12     | 5      | CNS Car SNB-75               | 88.8473 |         |
| 29  | 799999 | 1708DS5 | Mon Aug | 133    | S      | 1      | D       | 0.00001 | M      | Molar  | 12     | 9      | CNS Car U251                 | 78.5884 |         |
| 30  | 799999 | 1708DS5 | Mon Aug | 133    | S      | 1      | D       | 0.00001 | M      | Molar  | 10     | 1      | Melanon LOK-IMV              | 79.5577 |         |
| 31  | 799999 | 1708DS5 | Mon Aug | 133    | S      | 1      | D       | 0.00001 | M      | Molar  | 10     | 2      | Melanon MALME                | 102.129 |         |
| 32  | 799999 | 1708DS5 | Mon Aug | 133    | S      | 1      | D       | 0.00001 | M      | Molar  | 10     | 14     | Melanon M14                  | 84.6833 |         |
| 33  | 799999 | 1708DS5 | Mon Aug | 133    | S      | 1      | D       | 0.00001 | M      | Molar  | 5      | 11     | Melanon MDA-MI               | 101.869 |         |
| 34  | 799999 | 1708DS5 | Mon Aug | 133    | S      | 1      | D       | 0.00001 | M      | Molar  | 10     | 5      | Melanon SK-MEL               | 87.6977 |         |
| 35  | 799999 | 1708DS5 | Mon Aug | 133    | S      | 1      | D       | 0.00001 | M      | Molar  | 10     | 8      | Melanon SK-MEL               | 109.512 |         |
| 36  | 799999 | 1708DS5 | Mon Aug | 133    | S      | 1      | D       | 0.00001 | M      | Molar  | 10     | 7      | Melanon SK-MEL               | 80.9433 |         |
| 37  | 799999 | 1708DS5 | Mon Aug | 133    | S      | 1      | D       | 0.00001 | M      | Molar  | 10     | 21     | Melanon UACC-21              | 80.9349 |         |
| 38  | 799999 | 1708DS5 | Mon Aug | 133    | S      | 1      | D       | 0.00001 | M      | Molar  | 10     | 20     | Melanon UACC-62              | 86.0022 |         |
| 39  | 799999 | 1708DS5 | Mon Aug | 133    | S      | 1      | D       | 0.00001 | M      | Molar  | 6      | 10     | Ovarian (IGROV1              | 82.0413 |         |
| 40  | 799999 | 1708DS5 | Mon Aug | 133    | S      | 1      | D       | 0.00001 | M      | Molar  | 6      | 1      | Ovarian (OVCAR-              | 91.1451 |         |
| 41  | 799999 | 1708DS5 | Mon Aug | 133    | S      | 1      | D       | 0.00001 | M      | Molar  | 6      | 2      | Ovarian (OVCAR-              | 91.4863 |         |
| 42  | 799999 | 1708DS5 | Mon Aug | 133    | S      | 1      | D       | 0.00001 | M      | Molar  | 6      | 3      | Ovarian (OVCAR-              | 101.512 |         |
| 43  | 799999 | 1708DS5 | Mon Aug | 133    | S      | 1      | D       | 0.00001 | M      | Molar  | 6      | 5      | Ovarian (OVCAR-              | 84.0872 |         |
| 44  | 799999 | 1708DS5 | Mon Aug | 133    | S      | 1      | D       | 0.00001 | M      | Molar  | 5      | 2      | Ovarian (NCIHADF             | 104.69  |         |
| 45  | 799999 | 1708DS5 | Mon Aug | 133    | S      | 1      | D       | 0.00001 | M      | Molar  | 6      | 11     | Ovarian (SK-OV-3             | 83.5786 |         |
| 46  | 799999 | 1708DS5 | Mon Aug | 133    | S      | 1      | D       | 0.00001 | M      | Molar  | 9      | 18     | Renal C <sub>2</sub> 786-0   | 94.5011 |         |
| 47  | 799999 | 1708DS5 | Mon Aug | 133    | S      | 1      | D       | 0.00001 | M      | Molar  | 9      | 13     | Renal C <sub>2</sub> A498    | 90.5925 |         |
| 48  | 799999 | 1708DS5 | Mon Aug | 133    | S      | 1      | D       | 0.00001 | M      | Molar  | 9      | 23     | Renal C <sub>2</sub> ACHN    | 101.474 |         |
| 49  | 799999 | 1708DS5 | Mon Aug | 133    | S      | 1      | D       | 0.00001 | M      | Molar  | 9      | 15     | Renal C <sub>2</sub> CAK1-1  | 86.6237 |         |
| 50  | 799999 | 1708DS5 | Mon Aug | 133    | S      | 1      | D       | 0.00001 | M      | Molar  | 9      | 16     | Renal C <sub>2</sub> RXF 393 | 95.3233 |         |
| 51  | 799999 | 1708DS5 | Mon Aug | 133    | S      | 1      | D       | 0.00001 | M      | Molar  | 9      | 8      | Renal C <sub>2</sub> SN12C   | 83.0777 |         |
| 52  | 799999 | 1708DS5 | Mon Aug | 133    | S      | 1      | D       | 0.00001 | M      | Molar  | 9      | 24     | Renal C <sub>2</sub> TK-10   | 113.604 |         |
| 53  | 799999 | 1708DS5 | Mon Aug | 133    | S      | 1      | D       | 0.00001 | M      | Molar  | 9      | 4      | Renal C <sub>2</sub> UD-31   | 76.5557 |         |
| 54  | 799999 | 1708DS5 | Mon Aug | 133    | S      | 1      | D       | 0.00001 | M      | Molar  | 11     | 1      | Prostate PC-3                | 64.2337 |         |
| 55  | 799999 | 1708DS5 | Mon Aug | 133    | S      | 1      | D       | 0.00001 | M      | Molar  | 11     | 3      | Prostate DU-145              | 103.625 |         |
| 56  | 799999 | 1708DS5 | Mon Aug | 133    | S      | 1      | D       | 0.00001 | M      | Molar  | 5      | 1      | Breast C MCF7                | 68.6514 |         |
| 57  | 799999 | 1708DS5 | Mon Aug | 133    | S      | 1      | D       | 0.00001 | M      | Molar  | 5      | 5      | Breast C MDA-MI              | 81.9785 |         |
| 58  | 799999 | 1708DS5 | Mon Aug | 133    | S      | 1      | D       | 0.00001 | M      | Molar  | 5      | 6      | Breast C HS 578T             | 84.1707 |         |
| 59  | 799999 | 1708DS5 | Mon Aug | 133    | S      | 1      | D       | 0.00001 | M      | Molar  | 5      | 13     | Breast C BT-549              | 70.804  |         |
| 60  | 799999 | 1708DS5 | Mon Aug | 133    | S      | 1      | D       | 0.00001 | M      | Molar  | 5      | 14     | Breast C T-47D               | 73.6154 |         |
| 61  | 799999 | 1708DS5 | Mon Aug | 133    | S      | 1      | D       | 0.00001 | M      | Molar  | 5      | 18     | Breast C MDA-MI              | 96.5683 |         |
| 62  |        |         |         |        |        |        |         |         |        |        |        |        |                              |         |         |
| 63  |        |         |         |        |        |        |         |         |        |        |        |        |                              |         |         |
| 64  |        |         |         |        |        |        |         |         |        |        |        |        |                              |         |         |

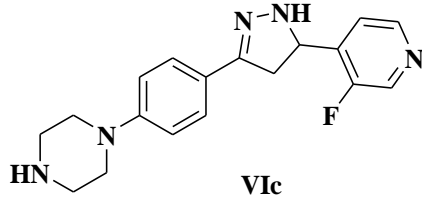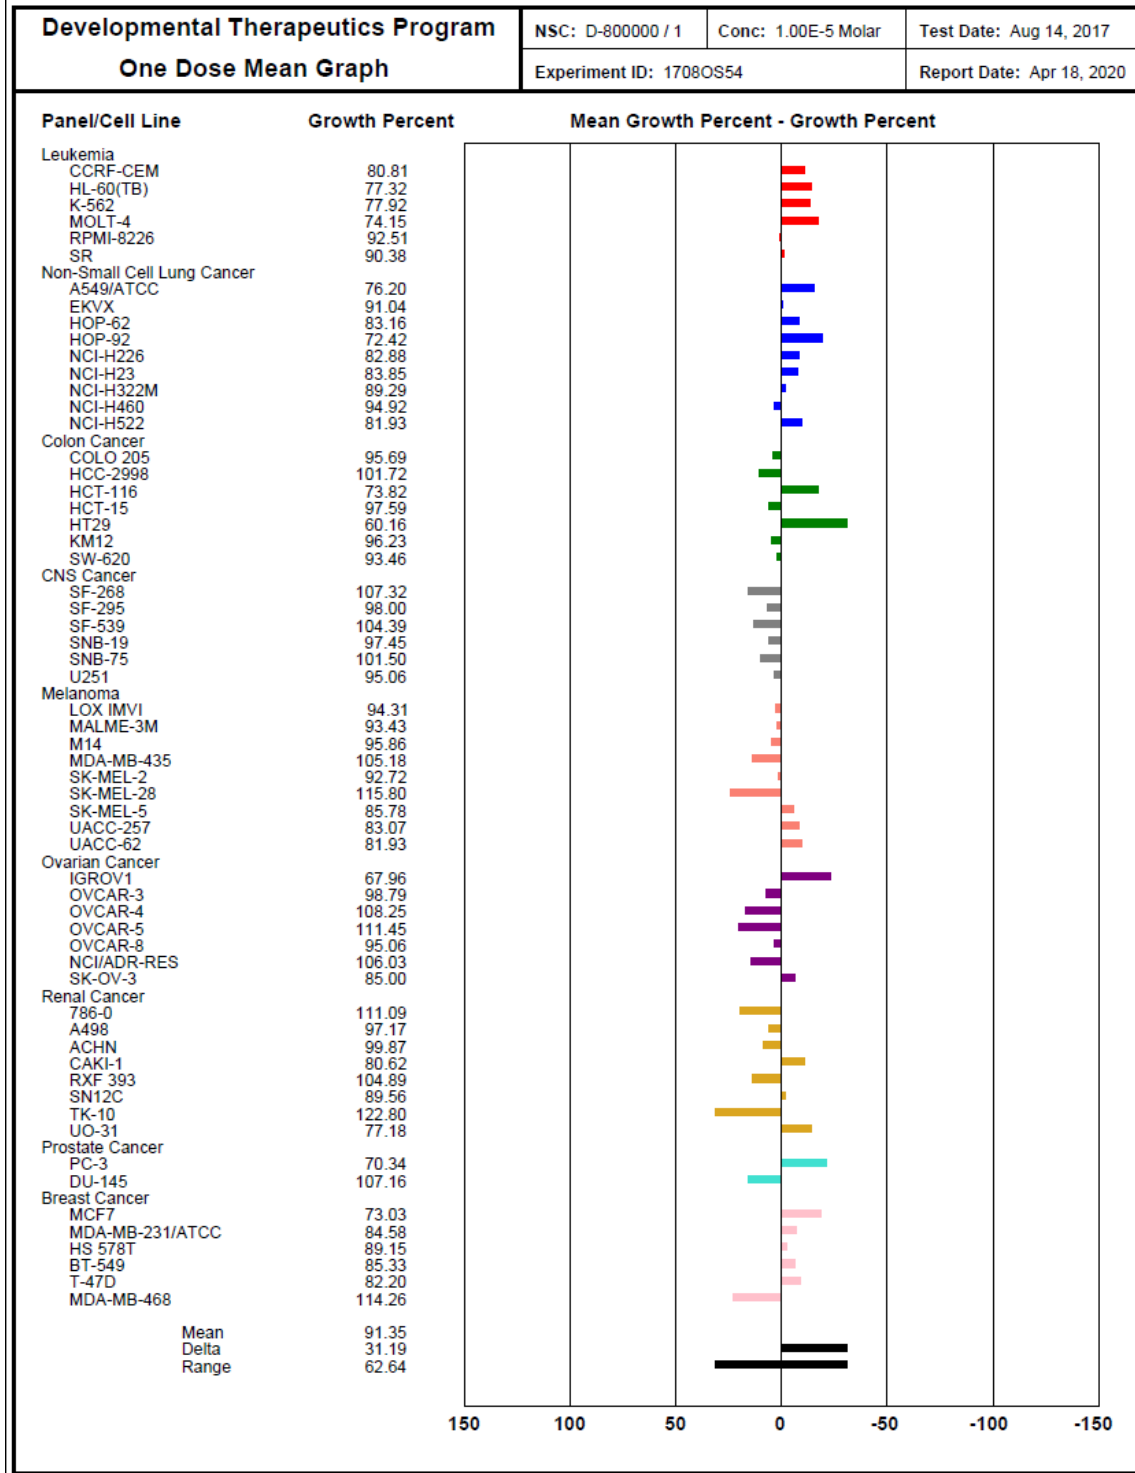

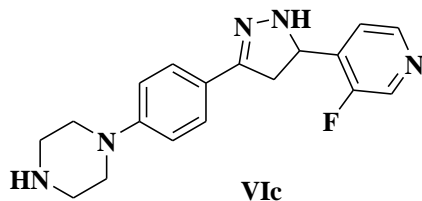

| NSC |        |         |         |        |        |        |         |      |         |        |        |        |        |                              |         |
|-----|--------|---------|---------|--------|--------|--------|---------|------|---------|--------|--------|--------|--------|------------------------------|---------|
| A   | B      | C       | D       | E      | F      | G      | H       | I    | J       | K      | L      | M      | N      | O                            | P       |
| 1   | NSC    | EXPID   | PLANDA  | TESTSE | PREFIX | SAMPLE | DISCREI | CONC | CONCUR  | CONCUR | PANELN | CELLNB | PANELN | CELLNA                       | GIPRCNT |
| 2   | 800000 | 1708OS5 | Mon Aug | 143    | S      |        | 1       | D    | 0.00001 | M      | Molar  | 7      | 3      | Leukemi. CCRF-C              | 80.8113 |
| 3   | 800000 | 1708OS5 | Mon Aug | 143    | S      |        | 1       | D    | 0.00001 | M      | Molar  | 7      | 8      | Leukemi. HL-60(TE            | 77.3207 |
| 4   | 800000 | 1708OS5 | Mon Aug | 143    | S      |        | 1       | D    | 0.00001 | M      | Molar  | 7      | 5      | Leukemi. K-562               | 77.9245 |
| 5   | 800000 | 1708OS5 | Mon Aug | 143    | S      |        | 1       | D    | 0.00001 | M      | Molar  | 7      | 6      | Leukemi. MOLT-4              | 74.1549 |
| 6   | 800000 | 1708OS5 | Mon Aug | 143    | S      |        | 1       | D    | 0.00001 | M      | Molar  | 7      | 10     | Leukemi. RPMI-82             | 92.5113 |
| 7   | 800000 | 1708OS5 | Mon Aug | 143    | S      |        | 1       | D    | 0.00001 | M      | Molar  | 7      | 19     | Leukemi. SR                  | 90.3909 |
| 8   | 800000 | 1708OS5 | Mon Aug | 143    | S      |        | 1       | D    | 0.00001 | M      | Molar  | 1      | 4      | Non-Sm. A549/AT              | 76.1998 |
| 9   | 800000 | 1708OS5 | Mon Aug | 143    | S      |        | 1       | D    | 0.00001 | M      | Molar  | 1      | 8      | Non-Sm. EK VX                | 91.0423 |
| 10  | 800000 | 1708OS5 | Mon Aug | 143    | S      |        | 1       | D    | 0.00001 | M      | Molar  | 1      | 26     | Non-Sm. HOP-62               | 83.1608 |
| 11  | 800000 | 1708OS5 | Mon Aug | 143    | S      |        | 1       | D    | 0.00001 | M      | Molar  | 1      | 29     | Non-Sm. HOP-92               | 72.4175 |
| 12  | 800000 | 1708OS5 | Mon Aug | 143    | S      |        | 1       | D    | 0.00001 | M      | Molar  | 1      | 13     | Non-Sm. NCI-H22              | 82.8754 |
| 13  | 800000 | 1708OS5 | Mon Aug | 143    | S      |        | 1       | D    | 0.00001 | M      | Molar  | 1      | 1      | Non-Sm. NCI-H23              | 83.846  |
| 14  | 800000 | 1708OS5 | Mon Aug | 143    | S      |        | 1       | D    | 0.00001 | M      | Molar  | 1      | 17     | Non-Sm. NCI-H32              | 89.2938 |
| 15  | 800000 | 1708OS5 | Mon Aug | 143    | S      |        | 1       | D    | 0.00001 | M      | Molar  | 1      | 21     | Non-Sm. NCI-H46              | 94.9227 |
| 16  | 800000 | 1708OS5 | Mon Aug | 143    | S      |        | 1       | D    | 0.00001 | M      | Molar  | 1      | 3      | Non-Sm. NCI-H52              | 81.9278 |
| 17  | 800000 | 1708OS5 | Mon Aug | 143    | S      |        | 1       | D    | 0.00001 | M      | Molar  | 4      | 10     | Colon C. COLO 20             | 95.6917 |
| 18  | 800000 | 1708OS5 | Mon Aug | 143    | S      |        | 1       | D    | 0.00001 | M      | Molar  | 4      | 2      | Colon C. HCC-29C             | 101.719 |
| 19  | 800000 | 1708OS5 | Mon Aug | 143    | S      |        | 1       | D    | 0.00001 | M      | Molar  | 4      | 3      | Colon C. HCT-116             | 73.8224 |
| 20  | 800000 | 1708OS5 | Mon Aug | 143    | S      |        | 1       | D    | 0.00001 | M      | Molar  | 4      | 15     | Colon C. HCT-15              | 97.5886 |
| 21  | 800000 | 1708OS5 | Mon Aug | 143    | S      |        | 1       | D    | 0.00001 | M      | Molar  | 4      | 1      | Colon C. HT29                | 60.158  |
| 22  | 800000 | 1708OS5 | Mon Aug | 143    | S      |        | 1       | D    | 0.00001 | M      | Molar  | 4      | 17     | Colon C. KM12                | 96.232  |
| 23  | 800000 | 1708OS5 | Mon Aug | 143    | S      |        | 1       | D    | 0.00001 | M      | Molar  | 4      | 9      | Colon C. Sw-620              | 93.4636 |
| 24  | 800000 | 1708OS5 | Mon Aug | 143    | S      |        | 1       | D    | 0.00001 | M      | Molar  | 12     | 14     | CNS Car SF-268               | 107.316 |
| 25  | 800000 | 1708OS5 | Mon Aug | 143    | S      |        | 1       | D    | 0.00001 | M      | Molar  | 12     | 15     | CNS Car SF-295               | 98.0044 |
| 26  | 800000 | 1708OS5 | Mon Aug | 143    | S      |        | 1       | D    | 0.00001 | M      | Molar  | 12     | 16     | CNS Car SF-539               | 104.387 |
| 27  | 800000 | 1708OS5 | Mon Aug | 143    | S      |        | 1       | D    | 0.00001 | M      | Molar  | 12     | 2      | CNS Car SNB-19               | 97.4539 |
| 28  | 800000 | 1708OS5 | Mon Aug | 143    | S      |        | 1       | D    | 0.00001 | M      | Molar  | 12     | 5      | CNS Car SNB-75               | 101.499 |
| 29  | 800000 | 1708OS5 | Mon Aug | 143    | S      |        | 1       | D    | 0.00001 | M      | Molar  | 12     | 9      | CNS Car U251                 | 95.0588 |
| 30  | 800000 | 1708OS5 | Mon Aug | 143    | S      |        | 1       | D    | 0.00001 | M      | Molar  | 10     | 1      | Melanon LOX-IMV              | 94.3125 |
| 31  | 800000 | 1708OS5 | Mon Aug | 143    | S      |        | 1       | D    | 0.00001 | M      | Molar  | 10     | 2      | Melanon MALME                | 93.4318 |
| 32  | 800000 | 1708OS5 | Mon Aug | 143    | S      |        | 1       | D    | 0.00001 | M      | Molar  | 10     | 14     | Melanon M14                  | 95.8636 |
| 33  | 800000 | 1708OS5 | Mon Aug | 143    | S      |        | 1       | D    | 0.00001 | M      | Molar  | 5      | 11     | Melanon MDA-MI               | 105.182 |
| 34  | 800000 | 1708OS5 | Mon Aug | 143    | S      |        | 1       | D    | 0.00001 | M      | Molar  | 10     | 5      | Melanon SK-MEL               | 92.7206 |
| 35  | 800000 | 1708OS5 | Mon Aug | 143    | S      |        | 1       | D    | 0.00001 | M      | Molar  | 10     | 8      | Melanon SK-MEL               | 115.799 |
| 36  | 800000 | 1708OS5 | Mon Aug | 143    | S      |        | 1       | D    | 0.00001 | M      | Molar  | 10     | 7      | Melanon SK-MEL               | 85.7776 |
| 37  | 800000 | 1708OS5 | Mon Aug | 143    | S      |        | 1       | D    | 0.00001 | M      | Molar  | 10     | 21     | Melanon UACC-25              | 83.0735 |
| 38  | 800000 | 1708OS5 | Mon Aug | 143    | S      |        | 1       | D    | 0.00001 | M      | Molar  | 10     | 20     | Melanon UACC-62              | 81.9328 |
| 39  | 800000 | 1708OS5 | Mon Aug | 143    | S      |        | 1       | D    | 0.00001 | M      | Molar  | 6      | 10     | Ovarian (IGROV1              | 67.9582 |
| 40  | 800000 | 1708OS5 | Mon Aug | 143    | S      |        | 1       | D    | 0.00001 | M      | Molar  | 6      | 1      | Ovarian (OVCAR-              | 98.7926 |
| 41  | 800000 | 1708OS5 | Mon Aug | 143    | S      |        | 1       | D    | 0.00001 | M      | Molar  | 6      | 2      | Ovarian (OVCAR-              | 108.252 |
| 42  | 800000 | 1708OS5 | Mon Aug | 143    | S      |        | 1       | D    | 0.00001 | M      | Molar  | 6      | 3      | Ovarian (OVCAR-              | 111.455 |
| 43  | 800000 | 1708OS5 | Mon Aug | 143    | S      |        | 1       | D    | 0.00001 | M      | Molar  | 6      | 5      | Ovarian (OVCAR-              | 95.0576 |
| 44  | 800000 | 1708OS5 | Mon Aug | 143    | S      |        | 1       | D    | 0.00001 | M      | Molar  | 5      | 2      | Ovarian (NCI/ADF             | 106.035 |
| 45  | 800000 | 1708OS5 | Mon Aug | 143    | S      |        | 1       | D    | 0.00001 | M      | Molar  | 6      | 11     | Ovarian (SK-OV-3             | 85      |
| 46  | 800000 | 1708OS5 | Mon Aug | 143    | S      |        | 1       | D    | 0.00001 | M      | Molar  | 9      | 18     | Renal C <sub>2</sub> 786-0   | 111.087 |
| 47  | 800000 | 1708OS5 | Mon Aug | 143    | S      |        | 1       | D    | 0.00001 | M      | Molar  | 9      | 13     | Renal C <sub>2</sub> A498    | 97.1731 |
| 48  | 800000 | 1708OS5 | Mon Aug | 143    | S      |        | 1       | D    | 0.00001 | M      | Molar  | 9      | 23     | Renal C <sub>2</sub> ACHN    | 99.8655 |
| 49  | 800000 | 1708OS5 | Mon Aug | 143    | S      |        | 1       | D    | 0.00001 | M      | Molar  | 9      | 15     | Renal C <sub>2</sub> CAKI-1  | 80.6225 |
| 50  | 800000 | 1708OS5 | Mon Aug | 143    | S      |        | 1       | D    | 0.00001 | M      | Molar  | 9      | 16     | Renal C <sub>2</sub> RFX 393 | 104.893 |
| 51  | 800000 | 1708OS5 | Mon Aug | 143    | S      |        | 1       | D    | 0.00001 | M      | Molar  | 9      | 8      | Renal C <sub>2</sub> SN12C   | 89.5574 |
| 52  | 800000 | 1708OS5 | Mon Aug | 143    | S      |        | 1       | D    | 0.00001 | M      | Molar  | 9      | 24     | Renal C <sub>2</sub> TK-10   | 122.802 |
| 53  | 800000 | 1708OS5 | Mon Aug | 143    | S      |        | 1       | D    | 0.00001 | M      | Molar  | 9      | 4      | Renal C <sub>2</sub> UO-31   | 77.183  |
| 54  | 800000 | 1708OS5 | Mon Aug | 143    | S      |        | 1       | D    | 0.00001 | M      | Molar  | 11     | 1      | Prostate PC-3                | 70.3411 |
| 55  | 800000 | 1708OS5 | Mon Aug | 143    | S      |        | 1       | D    | 0.00001 | M      | Molar  | 11     | 3      | Prostate DU-145              | 107.156 |
| 56  | 800000 | 1708OS5 | Mon Aug | 143    | S      |        | 1       | D    | 0.00001 | M      | Molar  | 5      | 1      | Breast C MCF7                | 73.0257 |
| 57  | 800000 | 1708OS5 | Mon Aug | 143    | S      |        | 1       | D    | 0.00001 | M      | Molar  | 5      | 5      | Breast C MDA-MI              | 84.5839 |
| 58  | 800000 | 1708OS5 | Mon Aug | 143    | S      |        | 1       | D    | 0.00001 | M      | Molar  | 5      | 6      | Breast C HS 578T             | 89.1513 |
| 59  | 800000 | 1708OS5 | Mon Aug | 143    | S      |        | 1       | D    | 0.00001 | M      | Molar  | 5      | 13     | Breast C BT-549              | 85.3253 |
| 60  | 800000 | 1708OS5 | Mon Aug | 143    | S      |        | 1       | D    | 0.00001 | M      | Molar  | 5      | 14     | Breast C T-47D               | 82.202  |
| 61  | 800000 | 1708OS5 | Mon Aug | 143    | S      |        | 1       | D    | 0.00001 | M      | Molar  | 5      | 18     | Breast C MDA-MI              | 114.258 |
| 62  |        |         |         |        |        |        |         |      |         |        |        |        |        |                              |         |
| 63  |        |         |         |        |        |        |         |      |         |        |        |        |        |                              |         |
| 64  |        |         |         |        |        |        |         |      |         |        |        |        |        |                              |         |

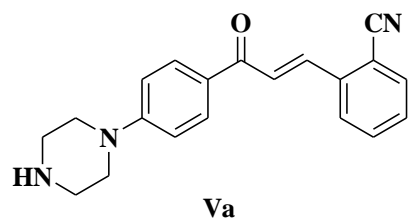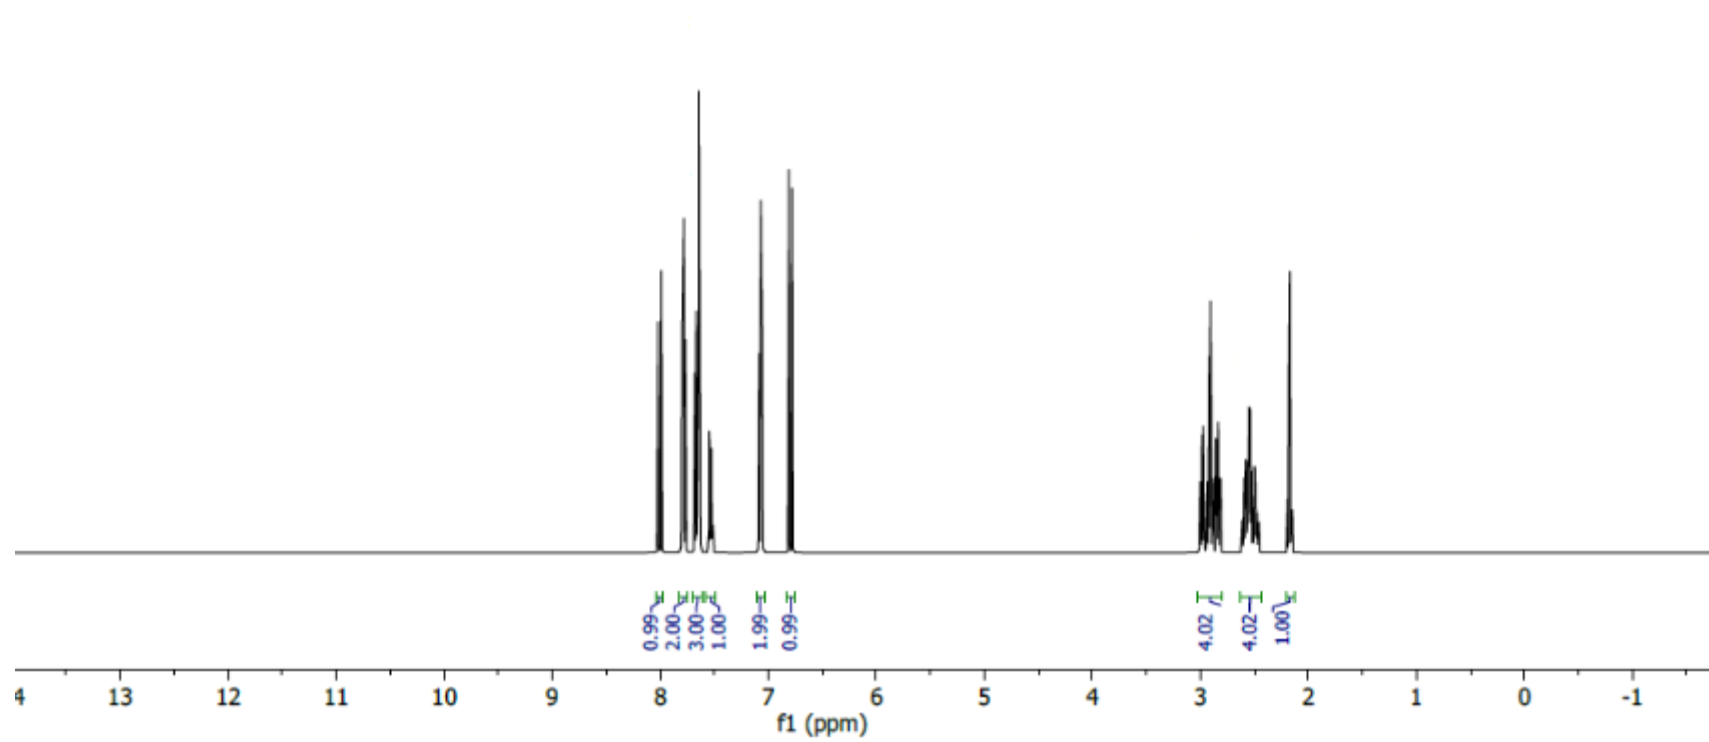

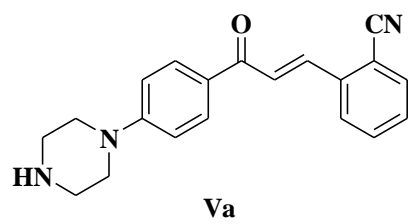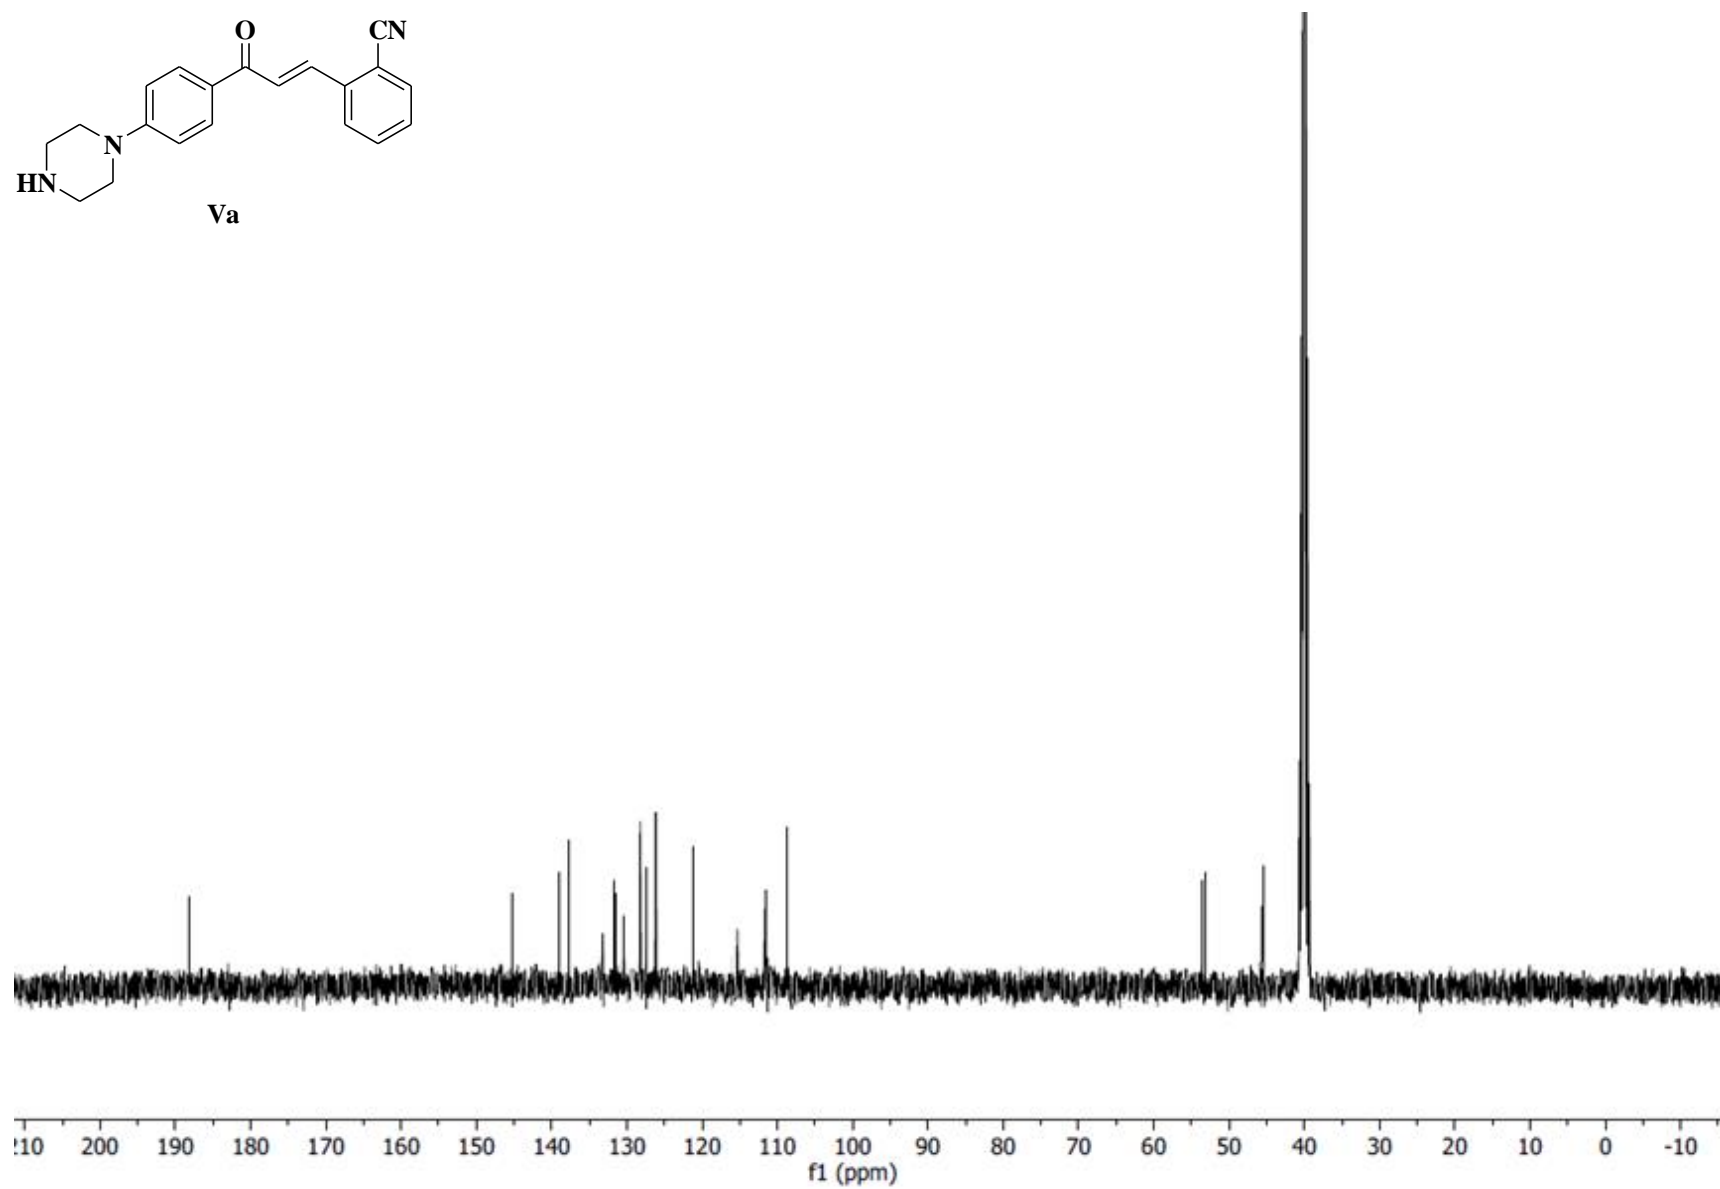



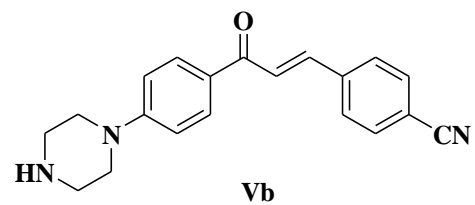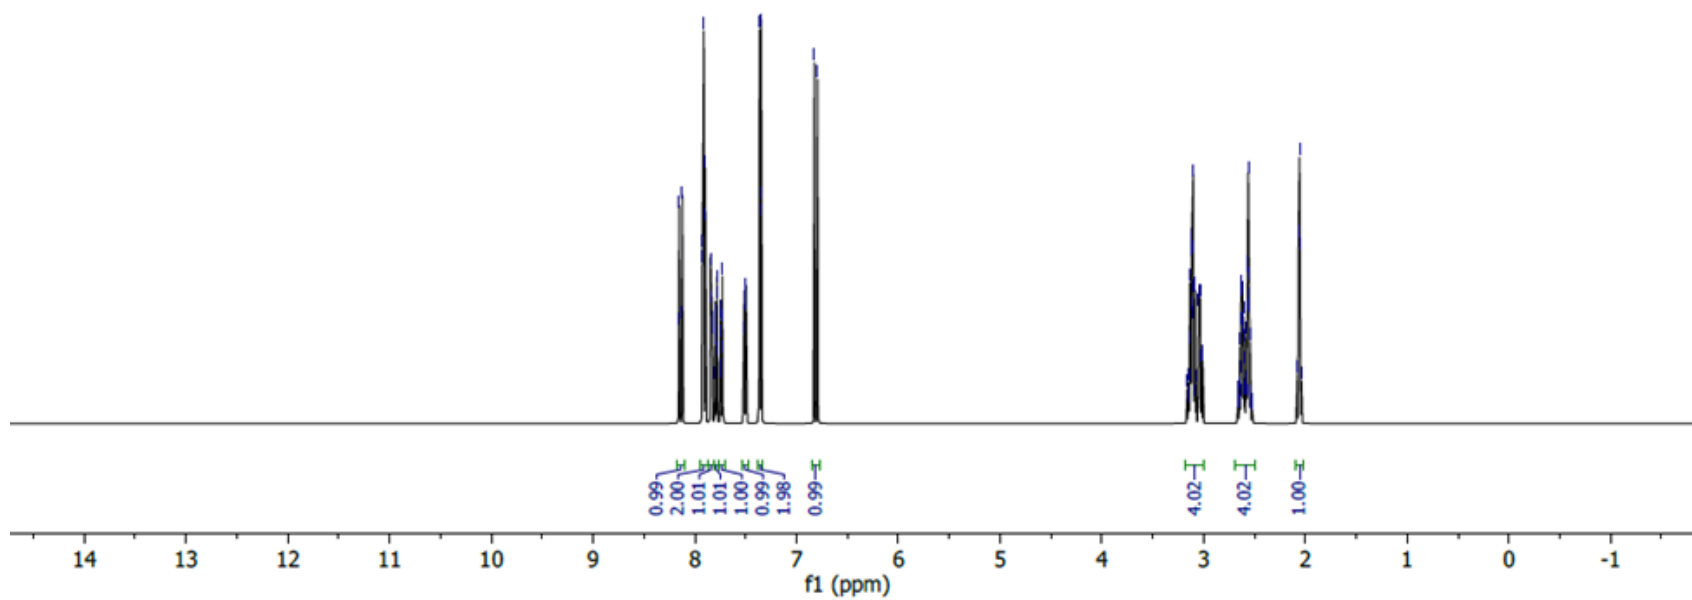

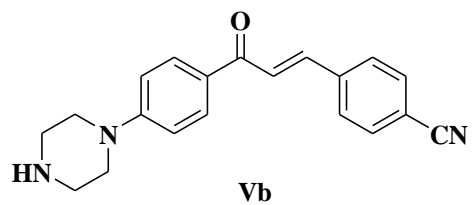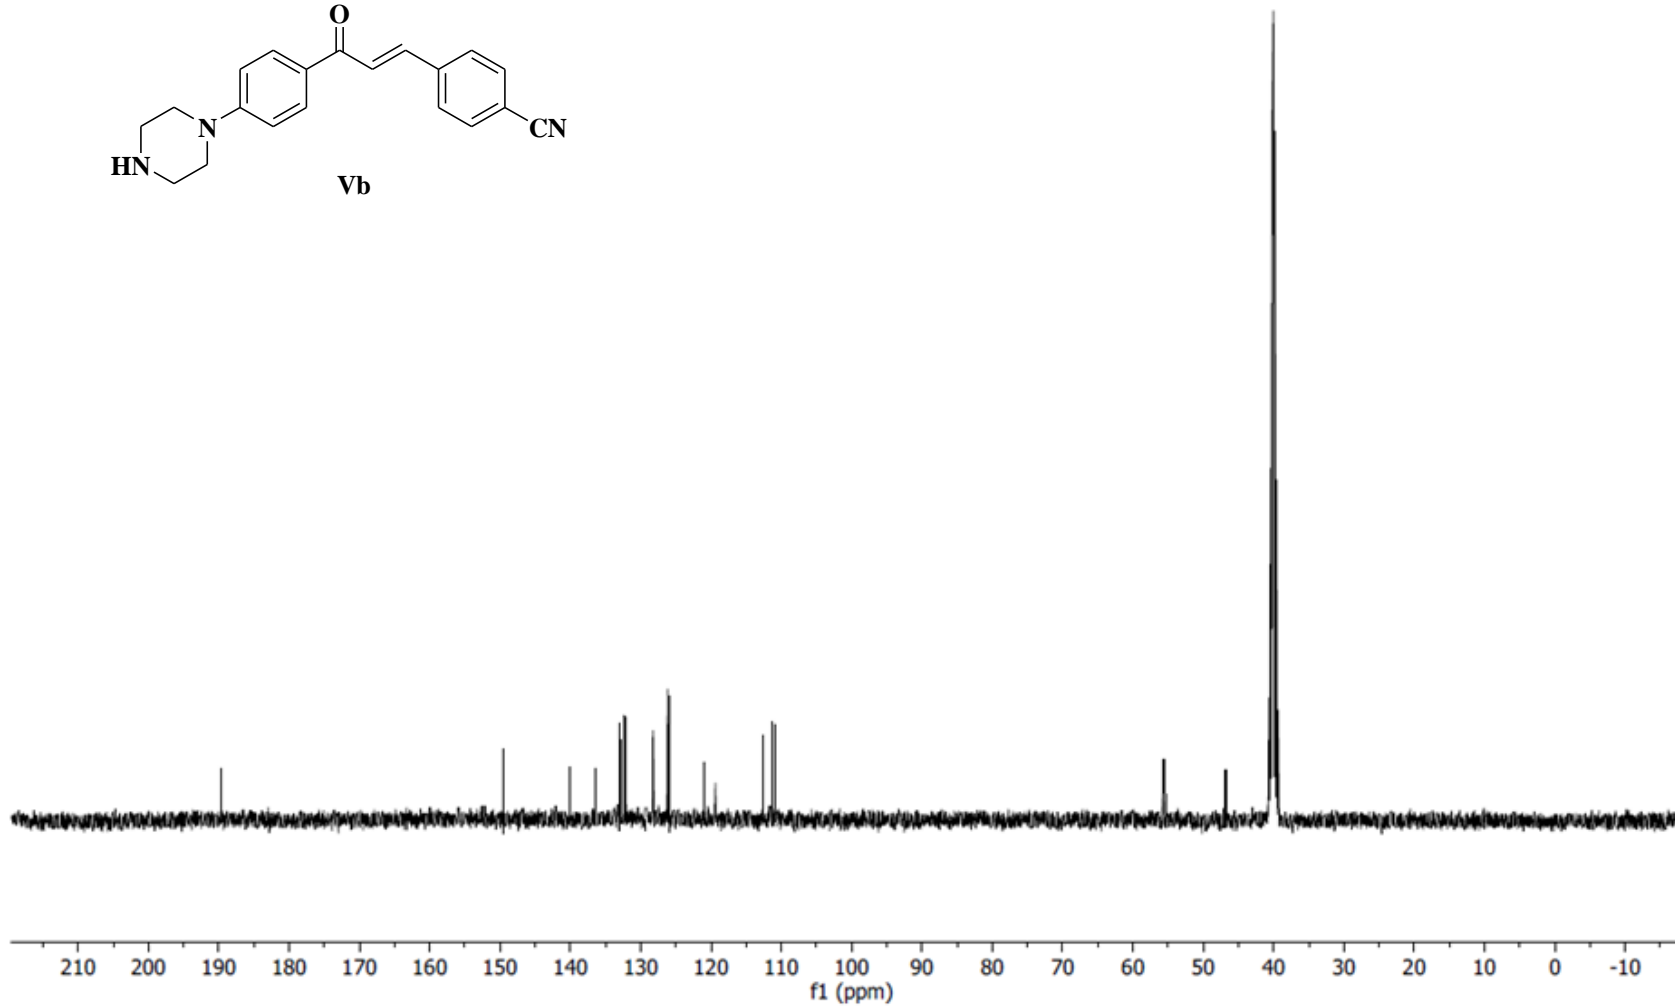

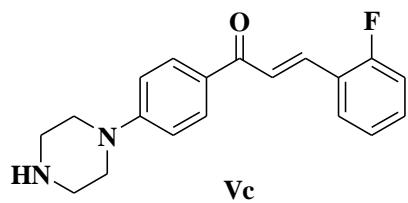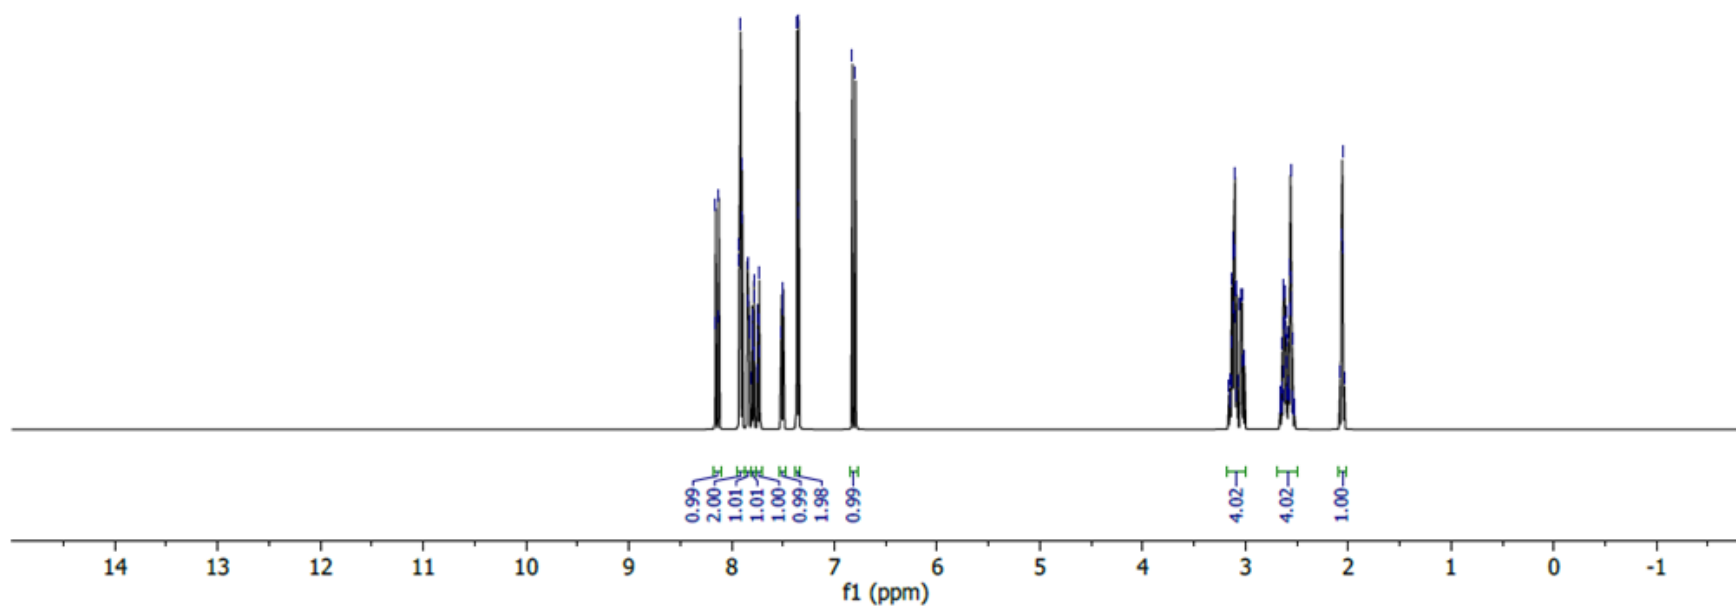

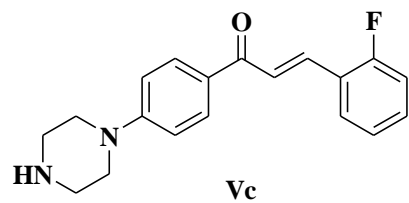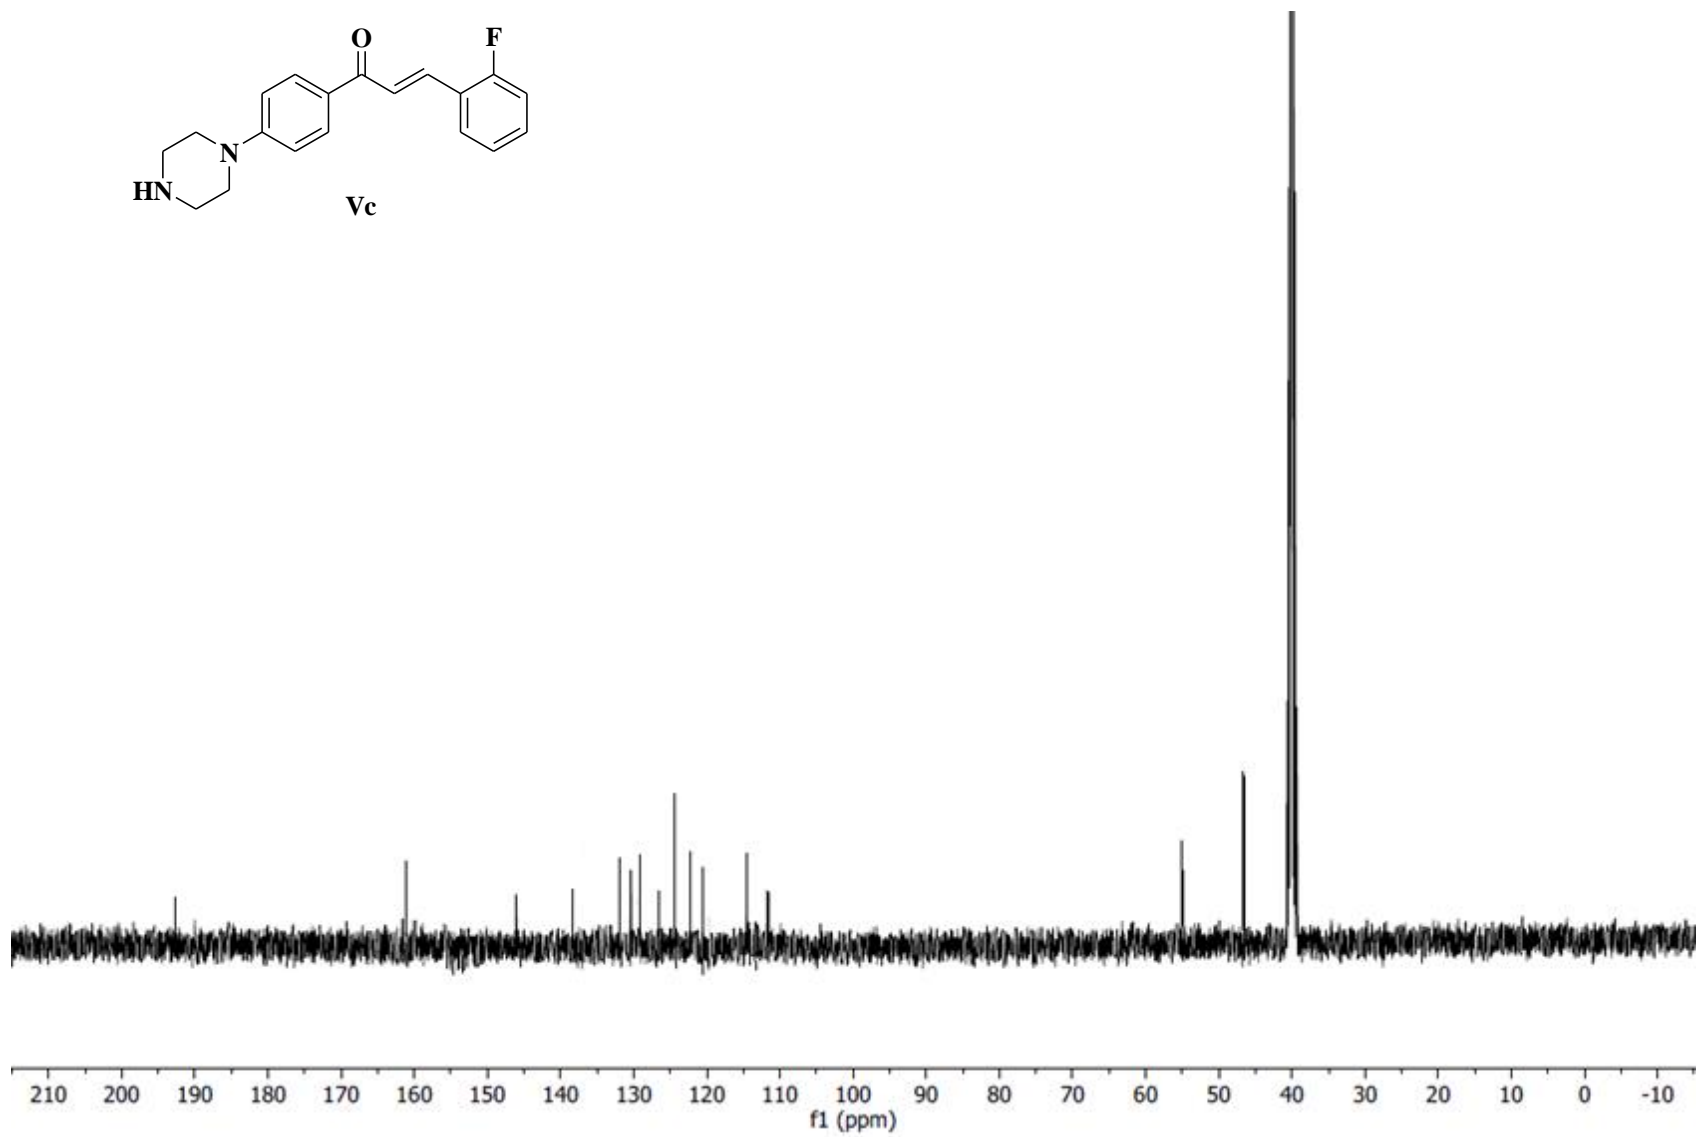

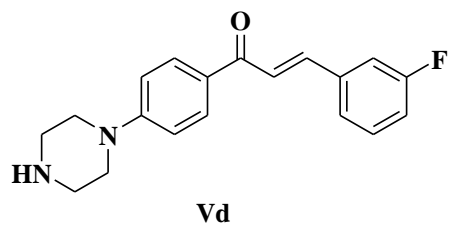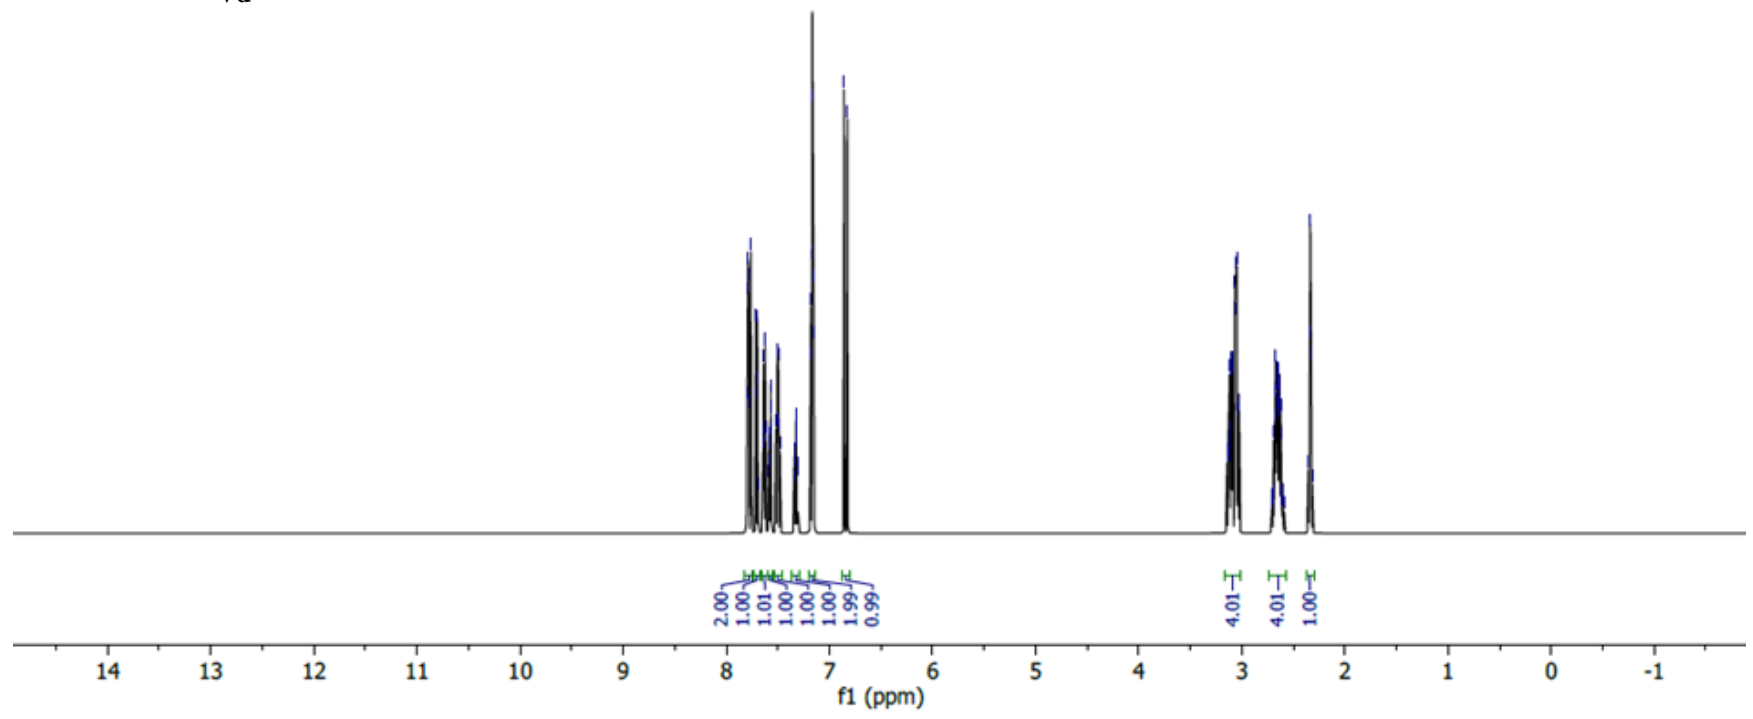

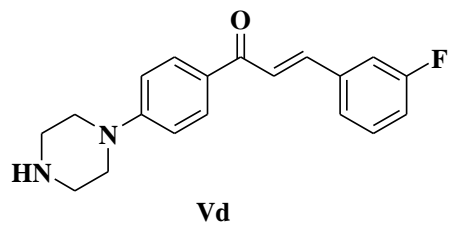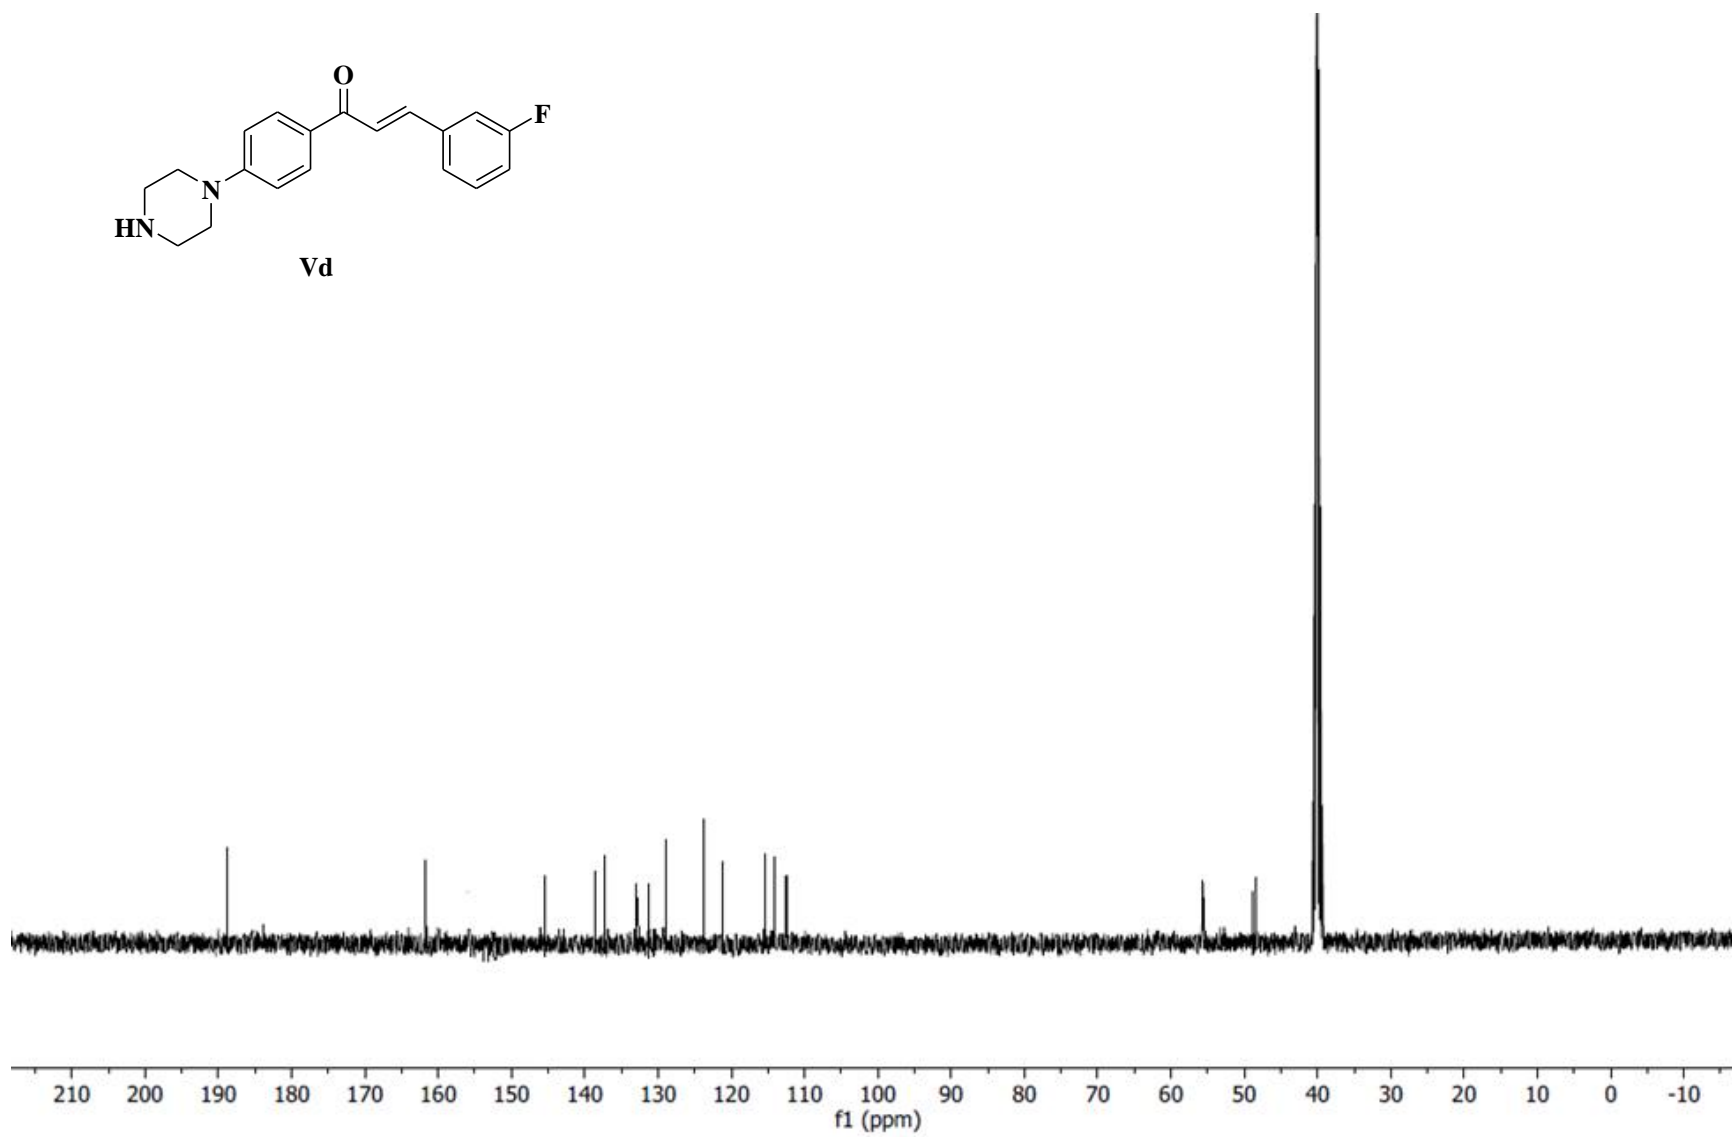

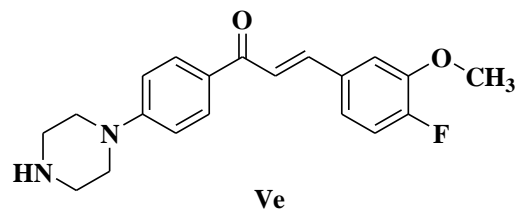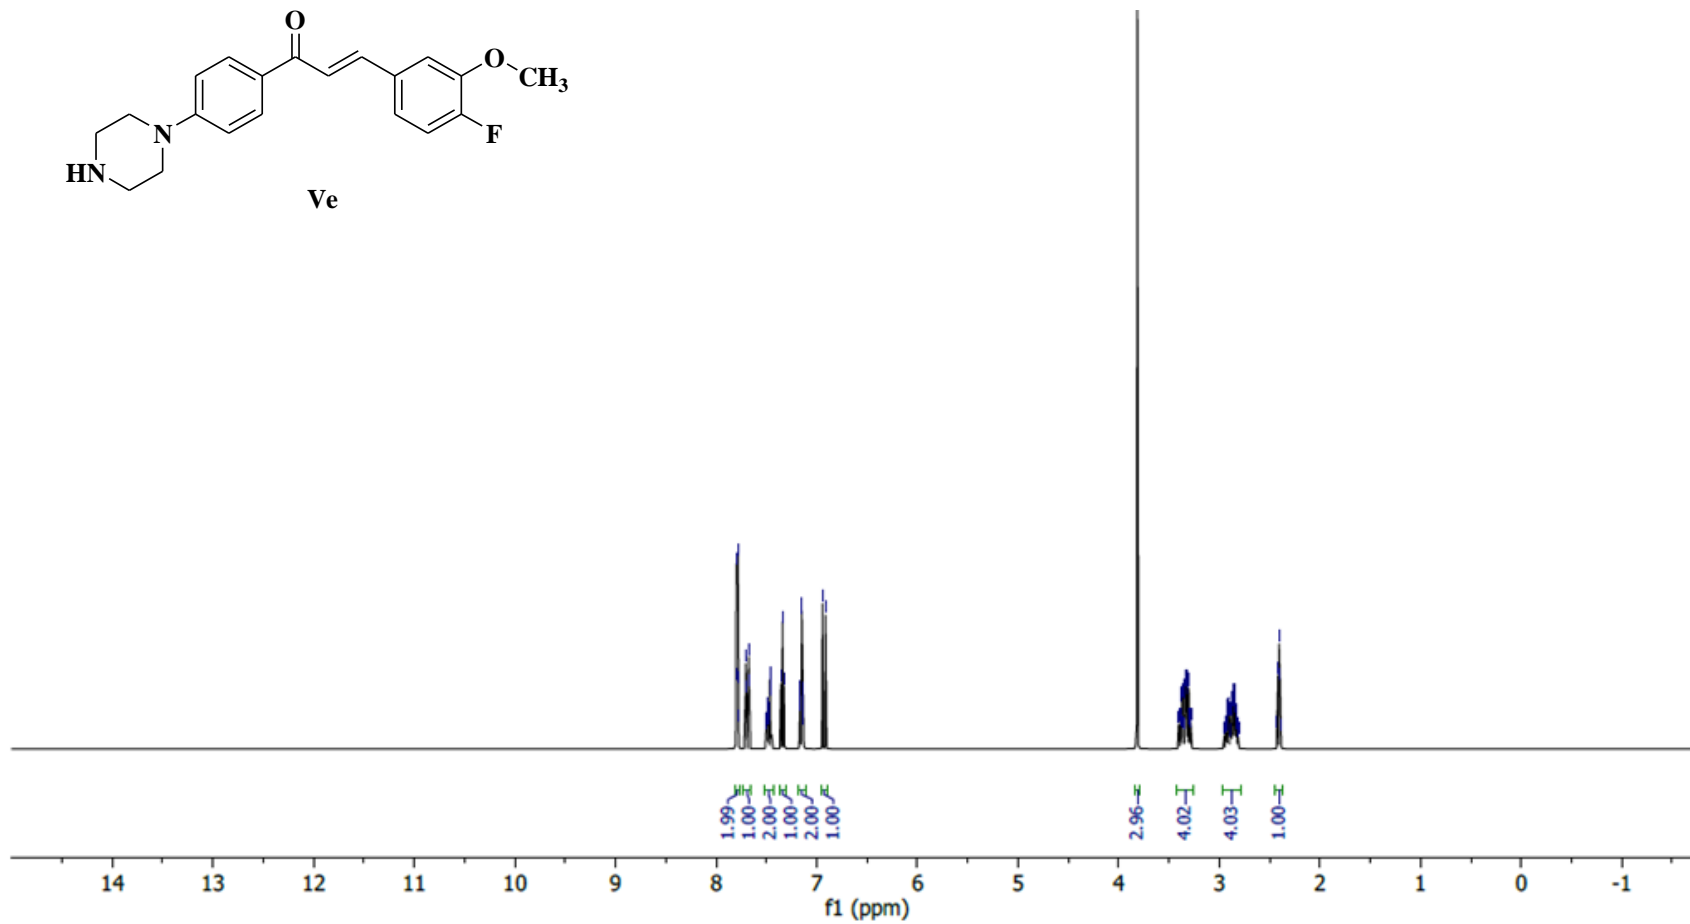

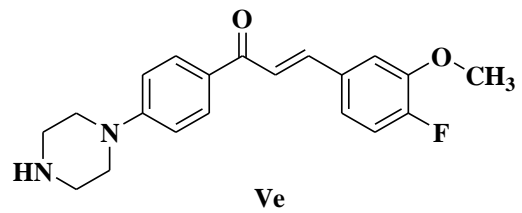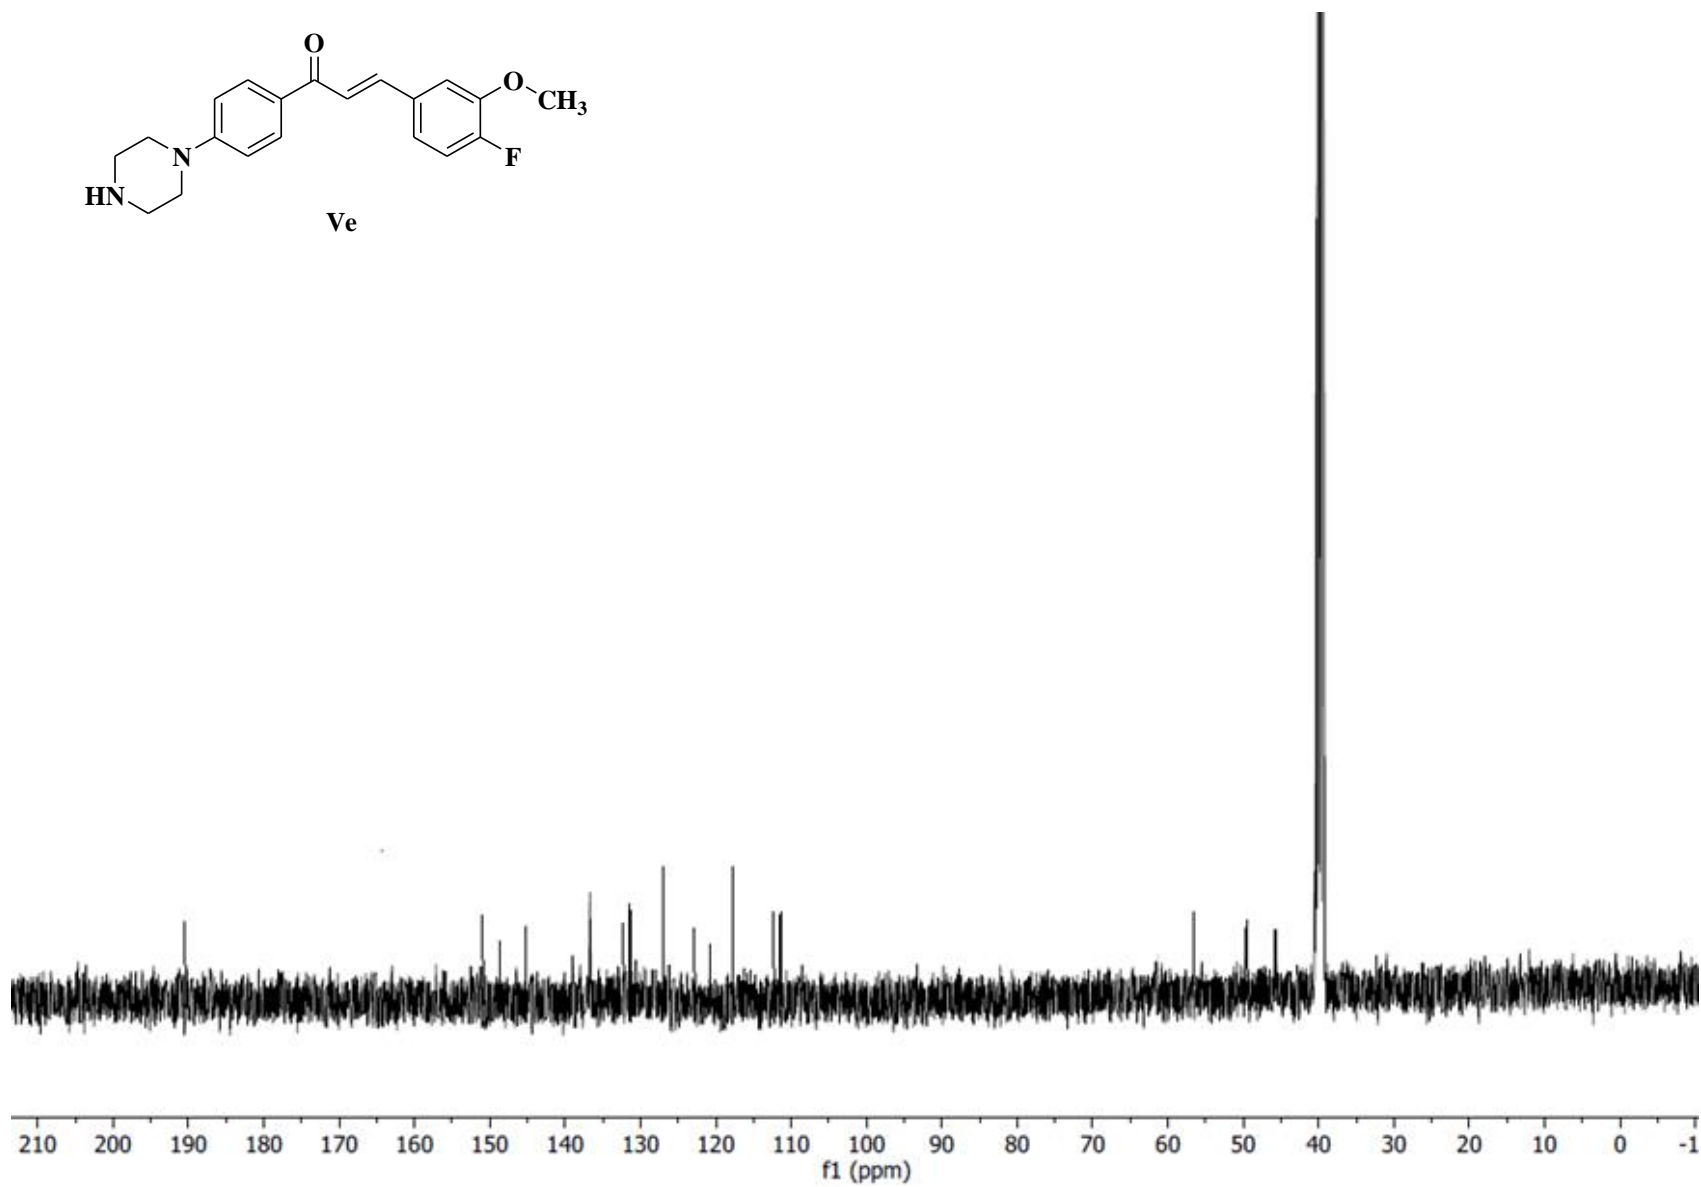



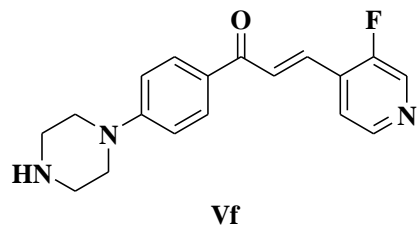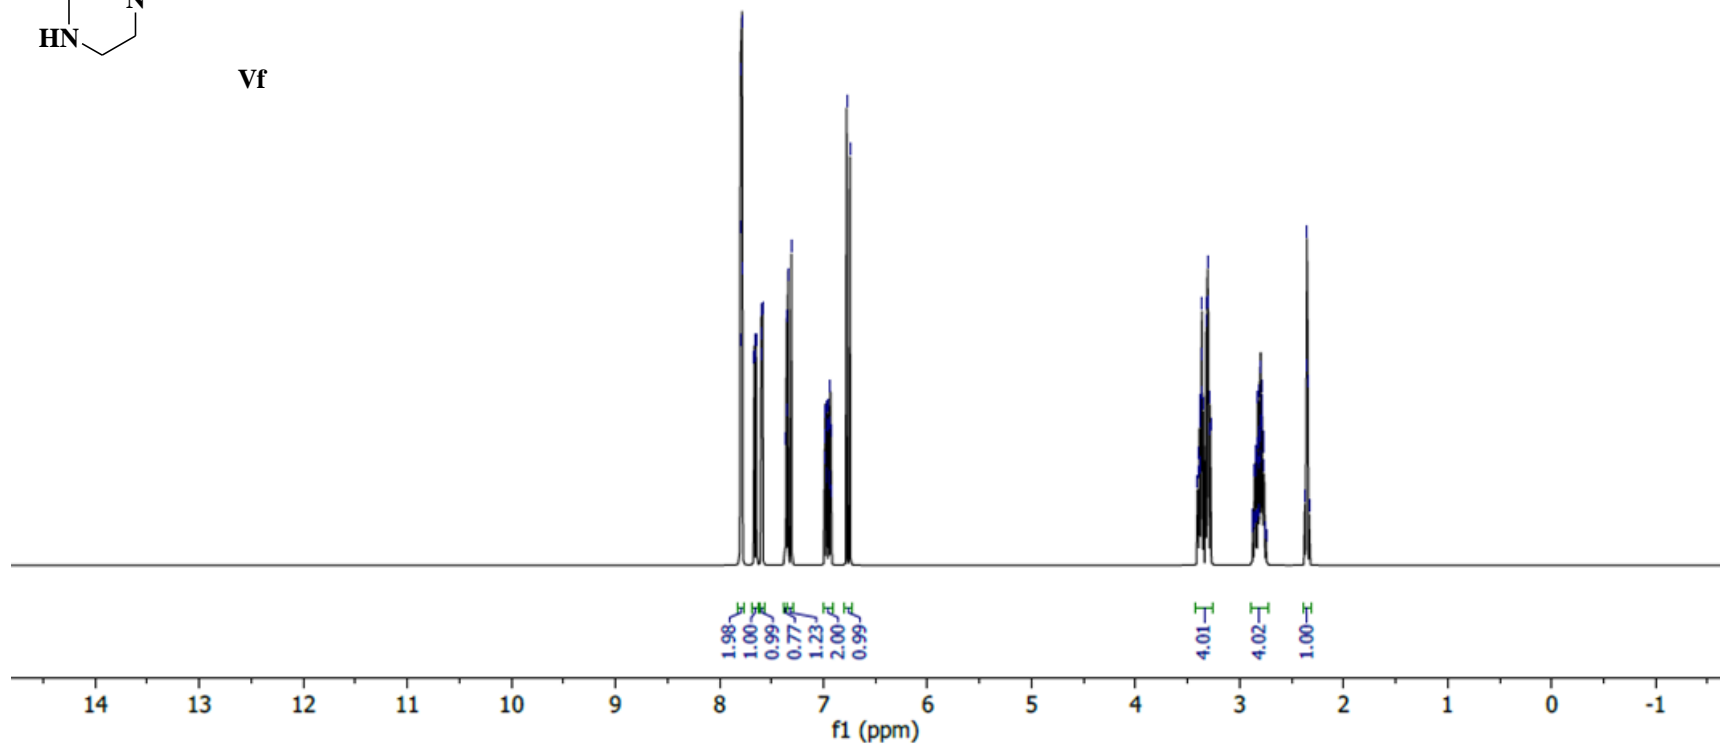

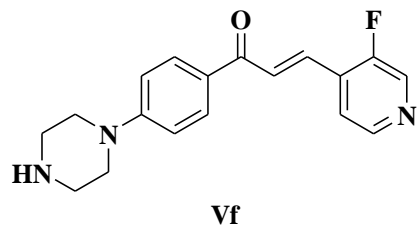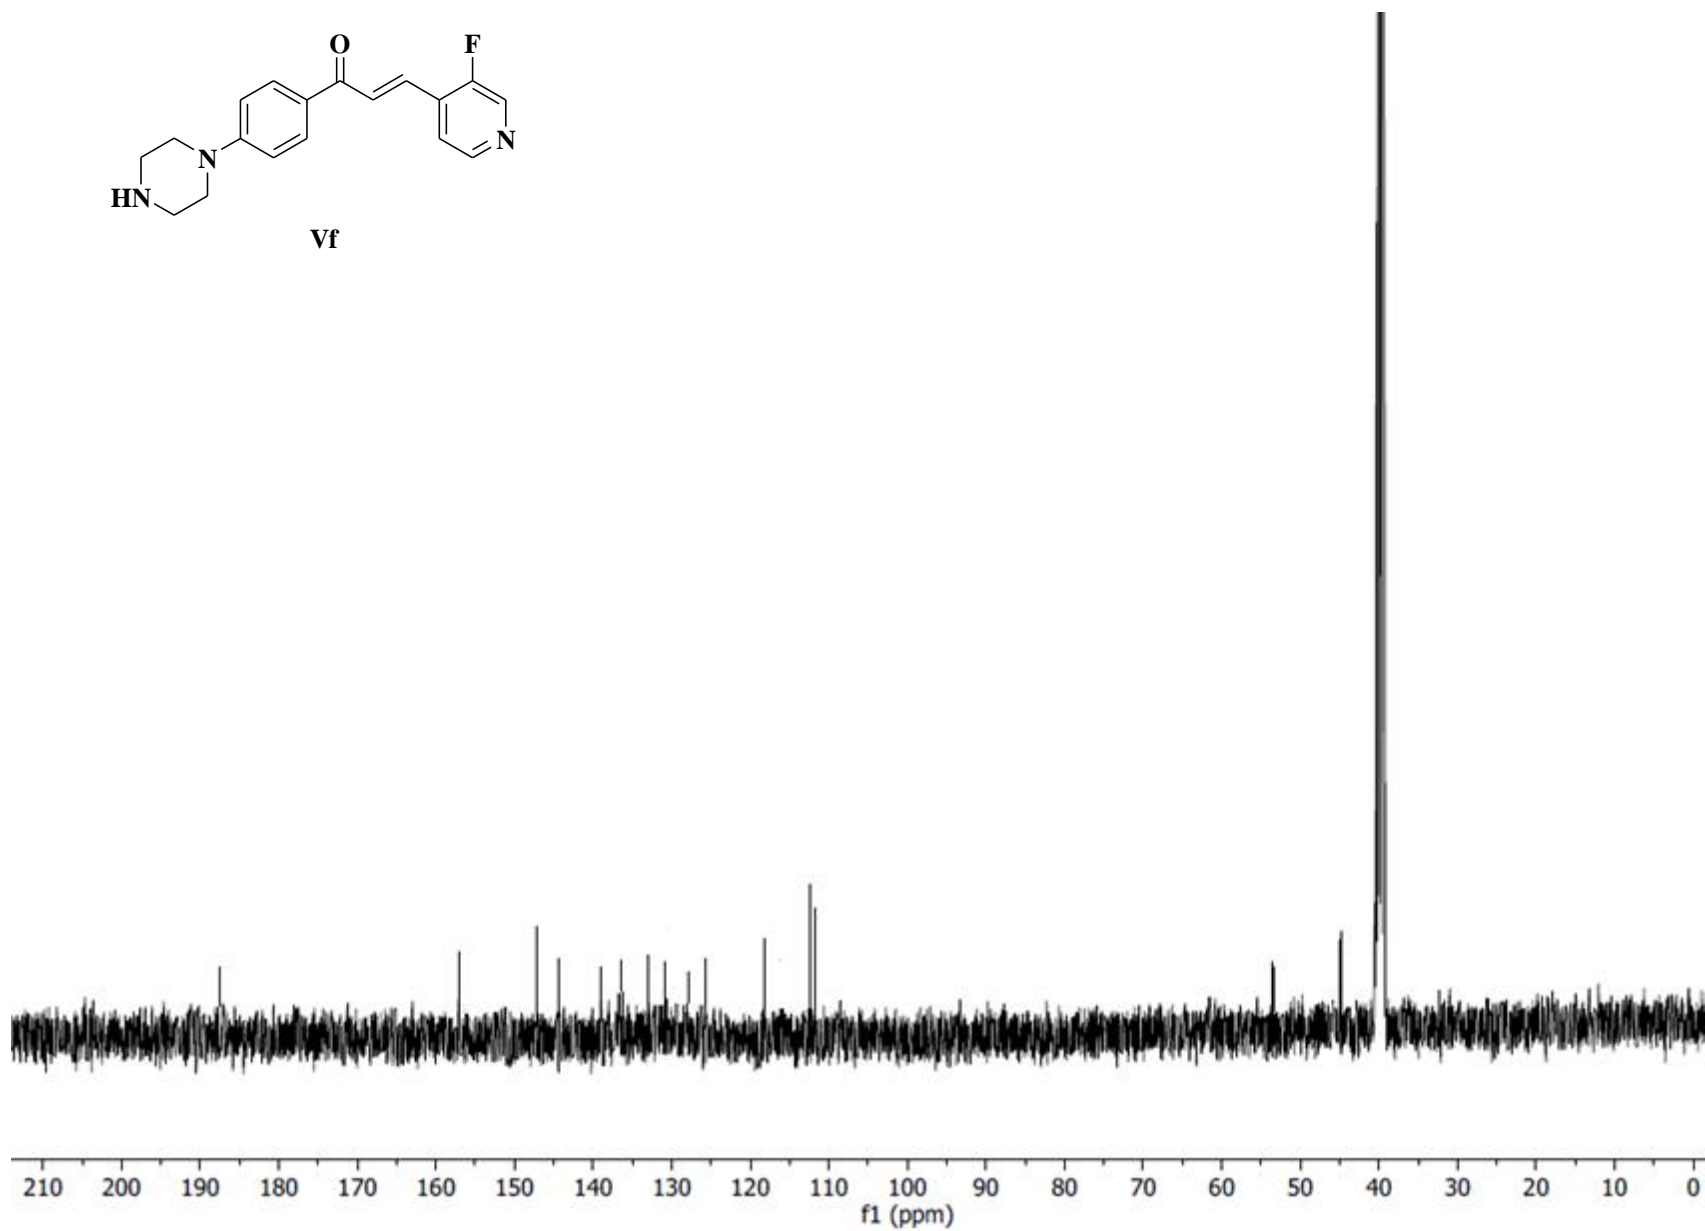

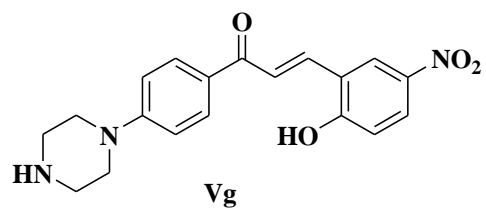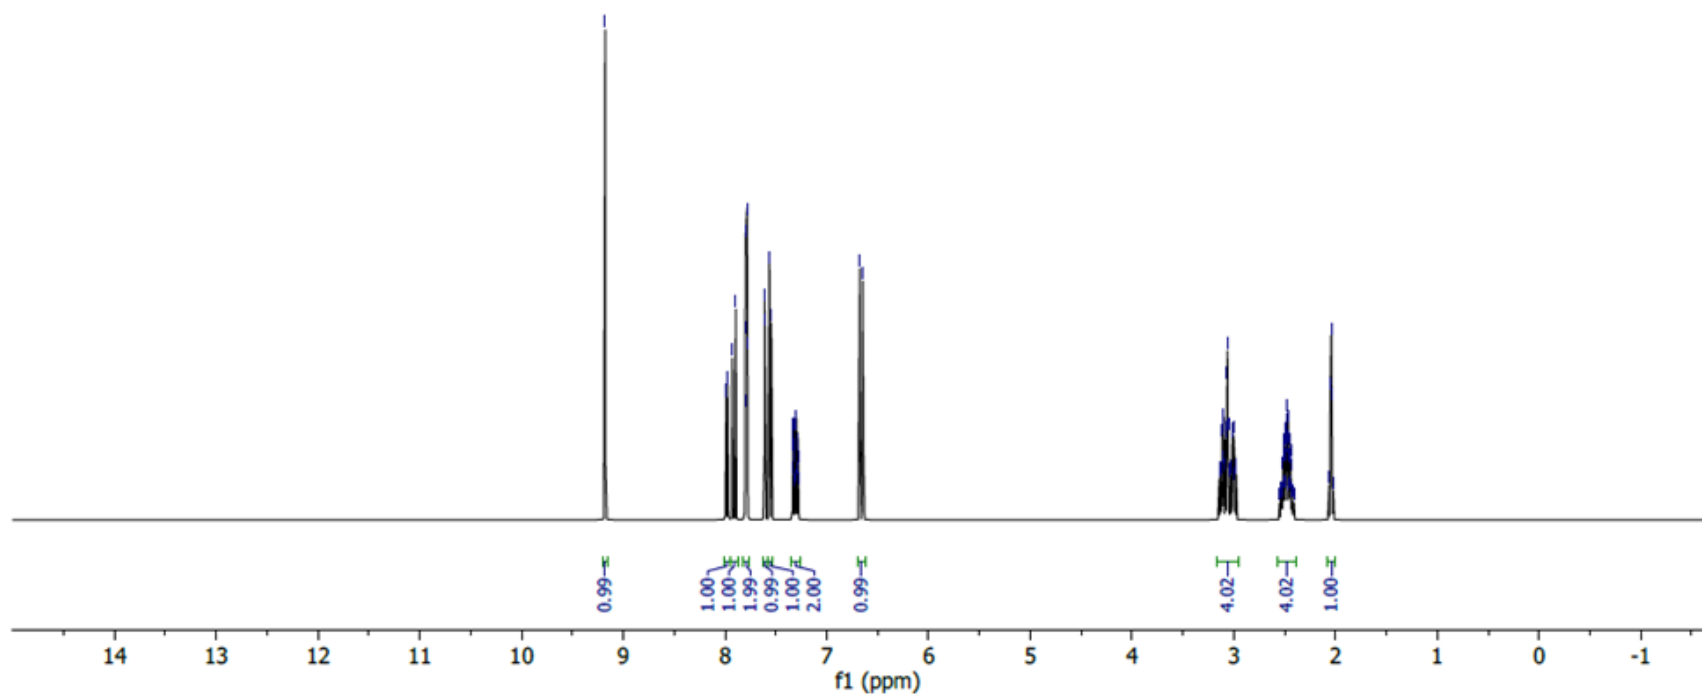

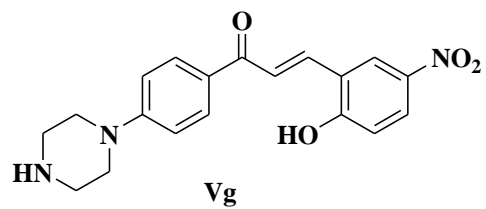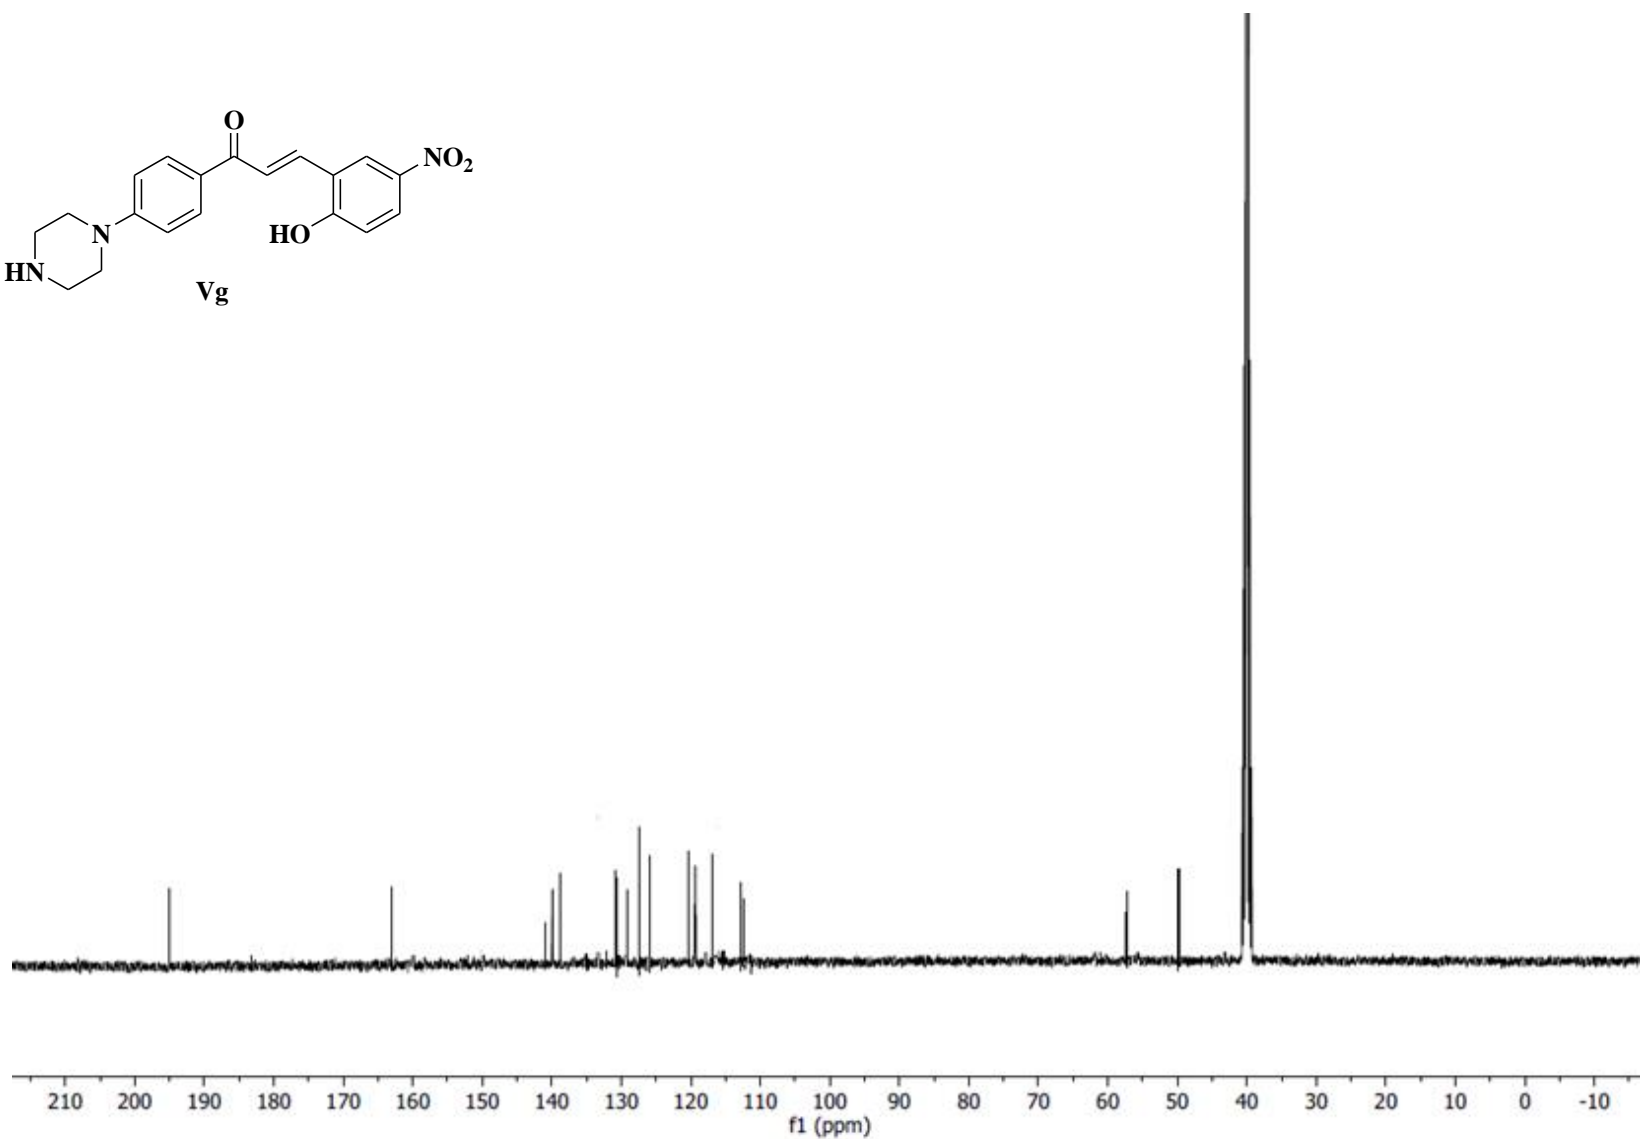

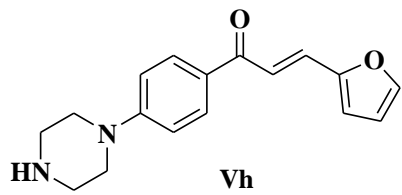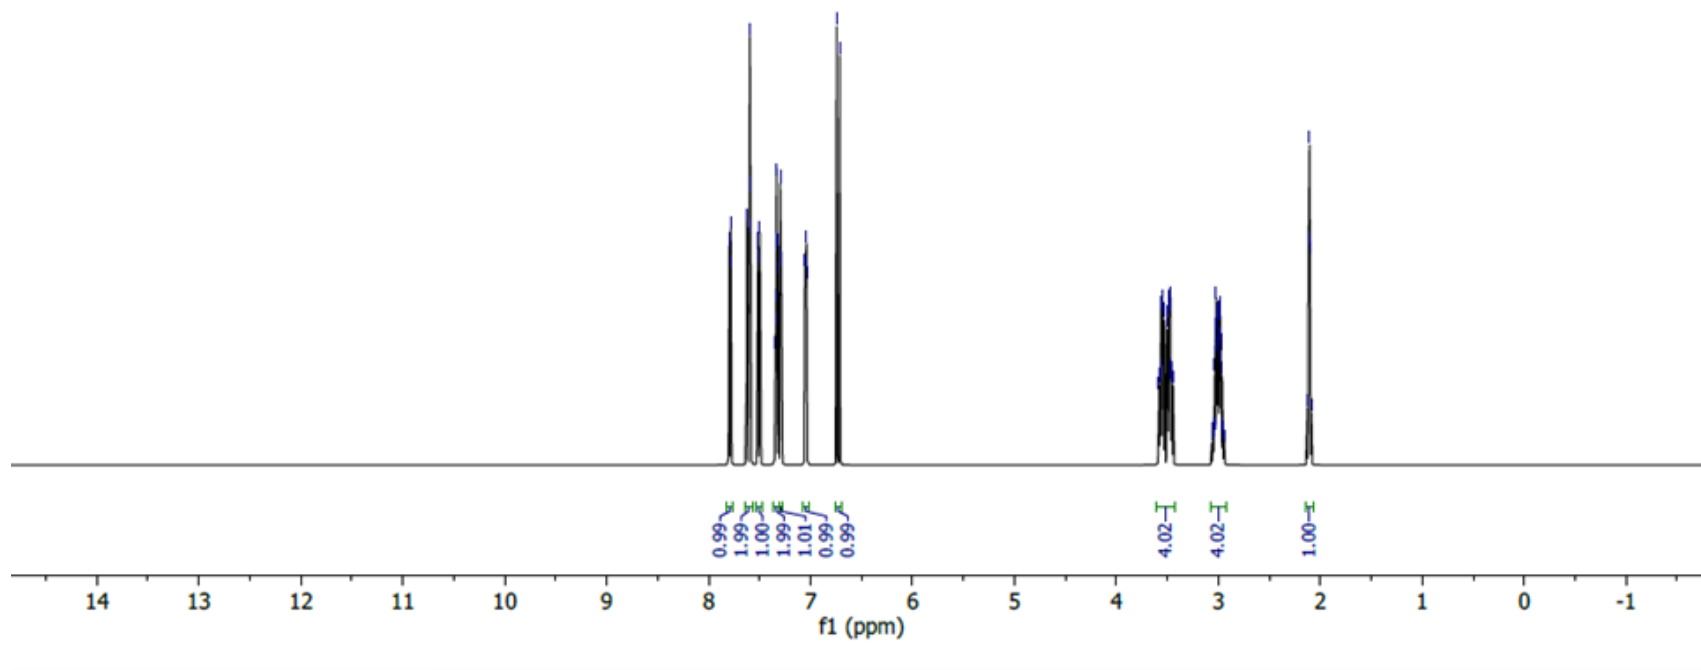

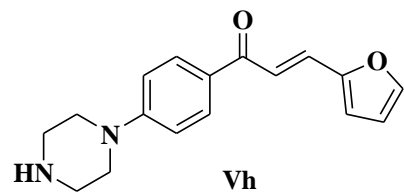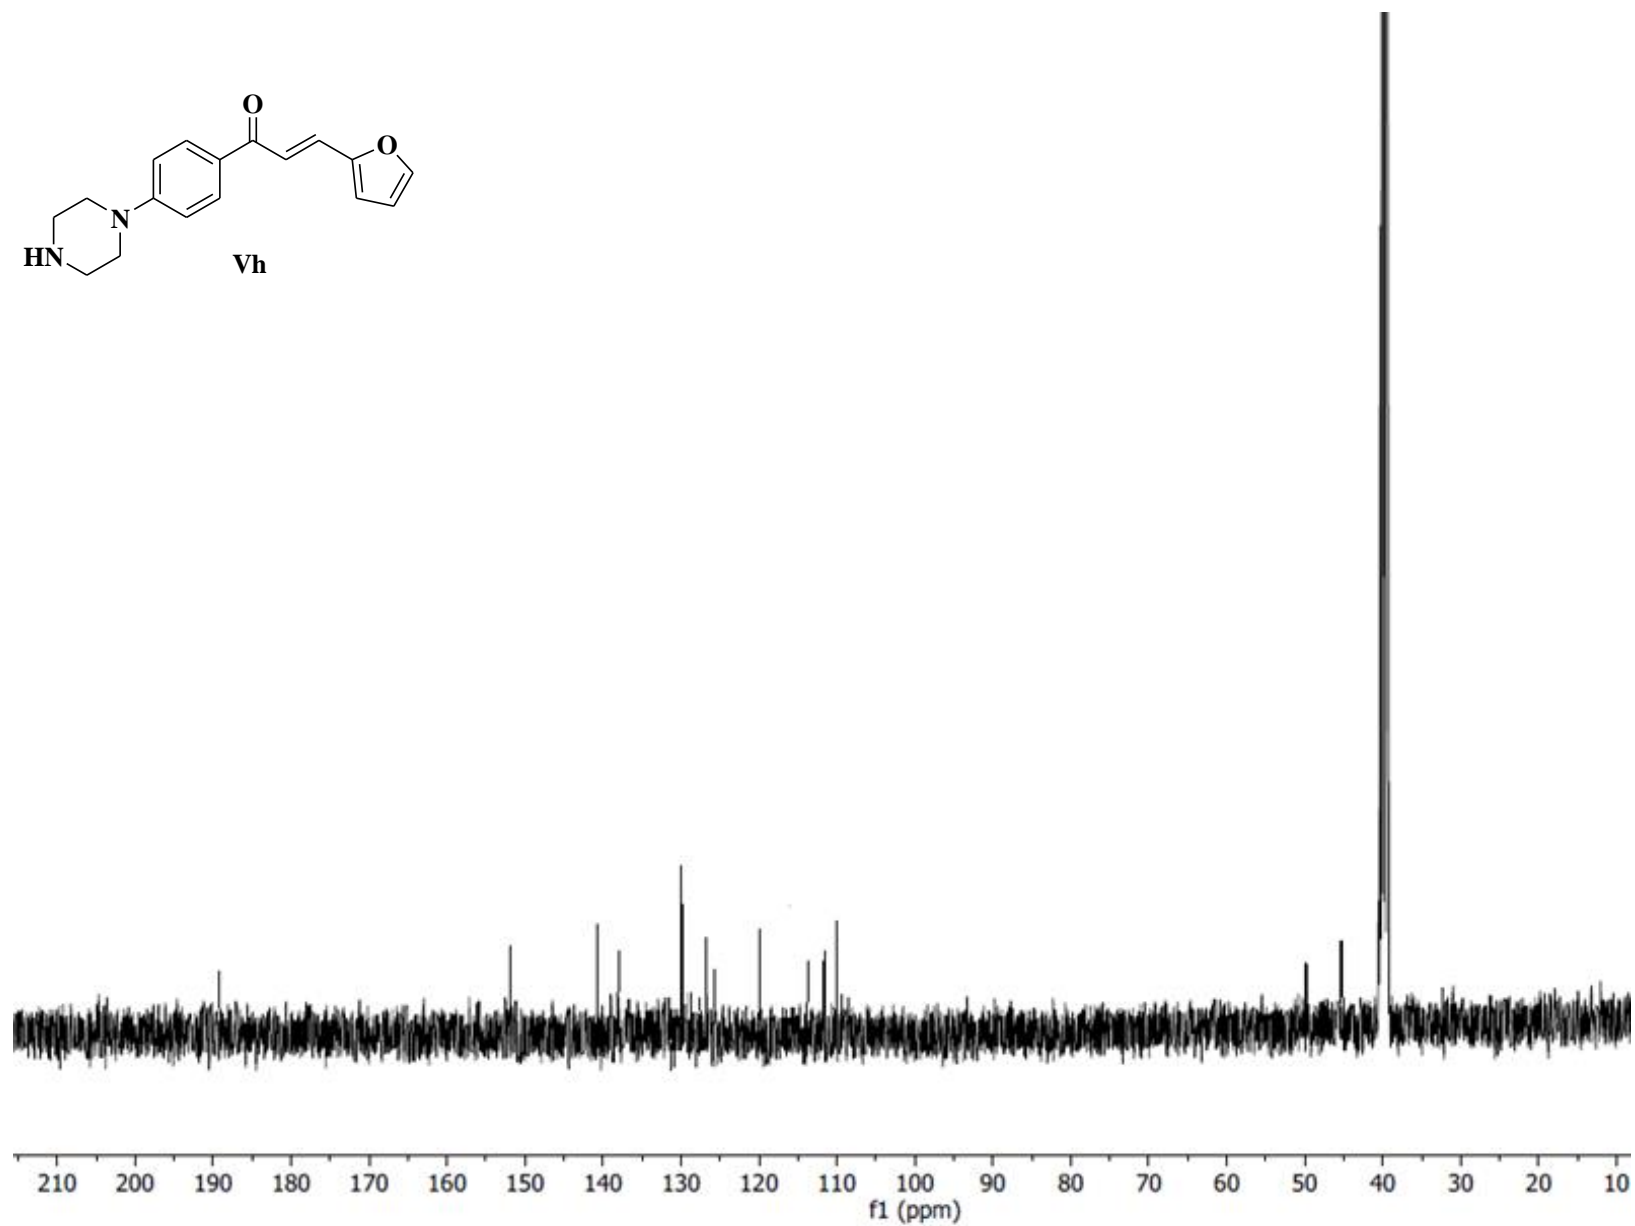

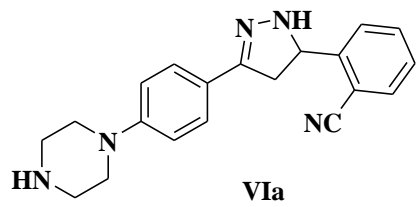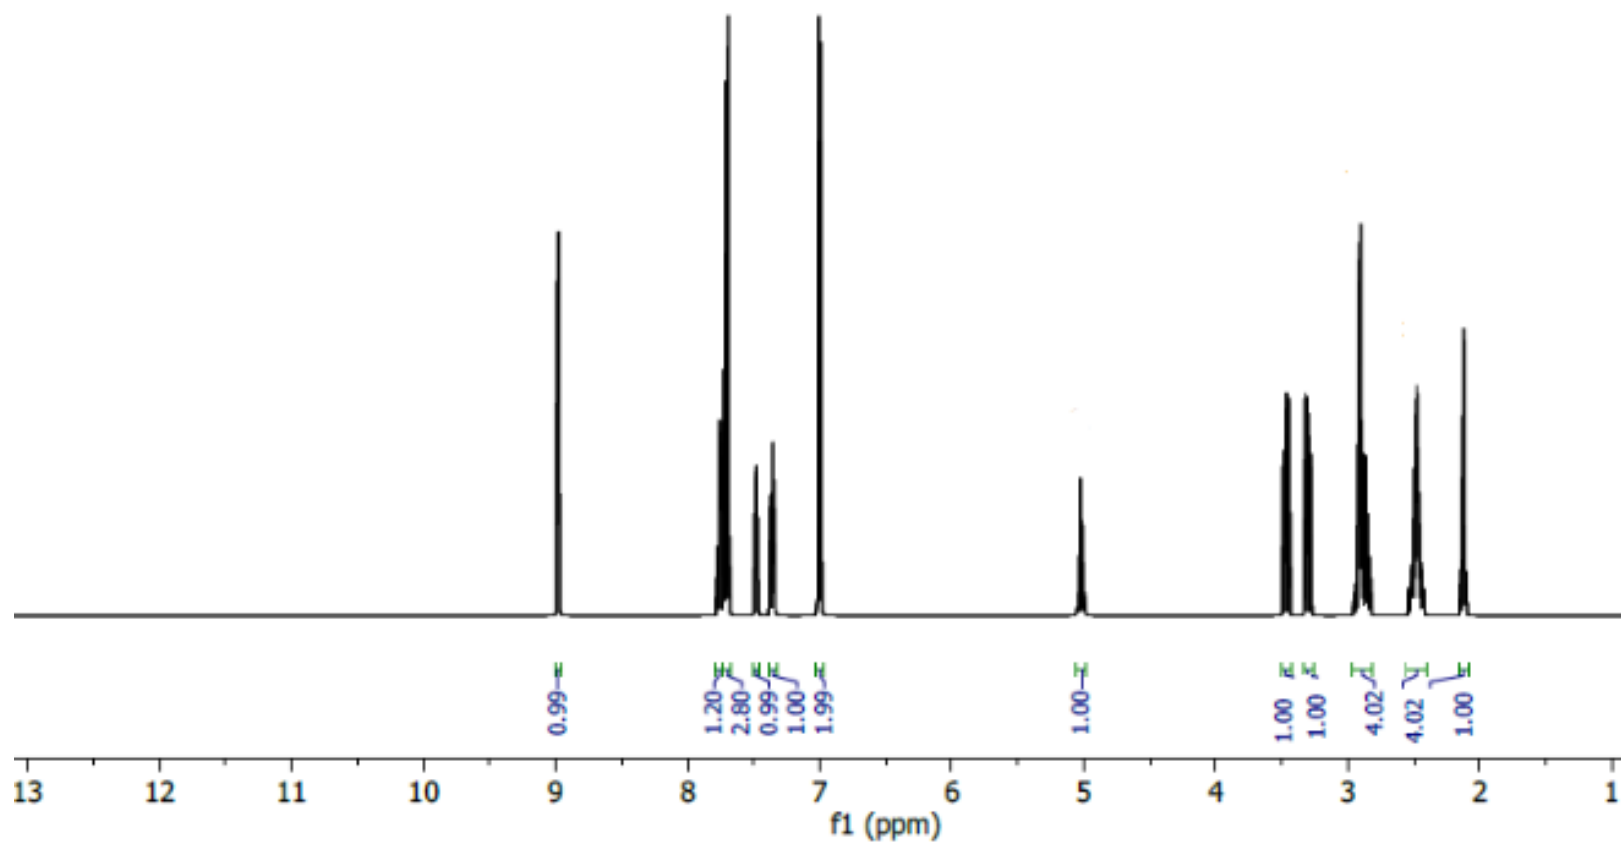

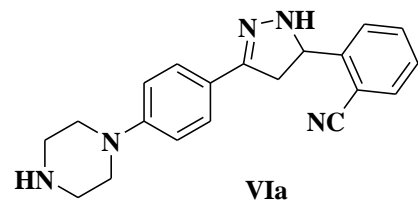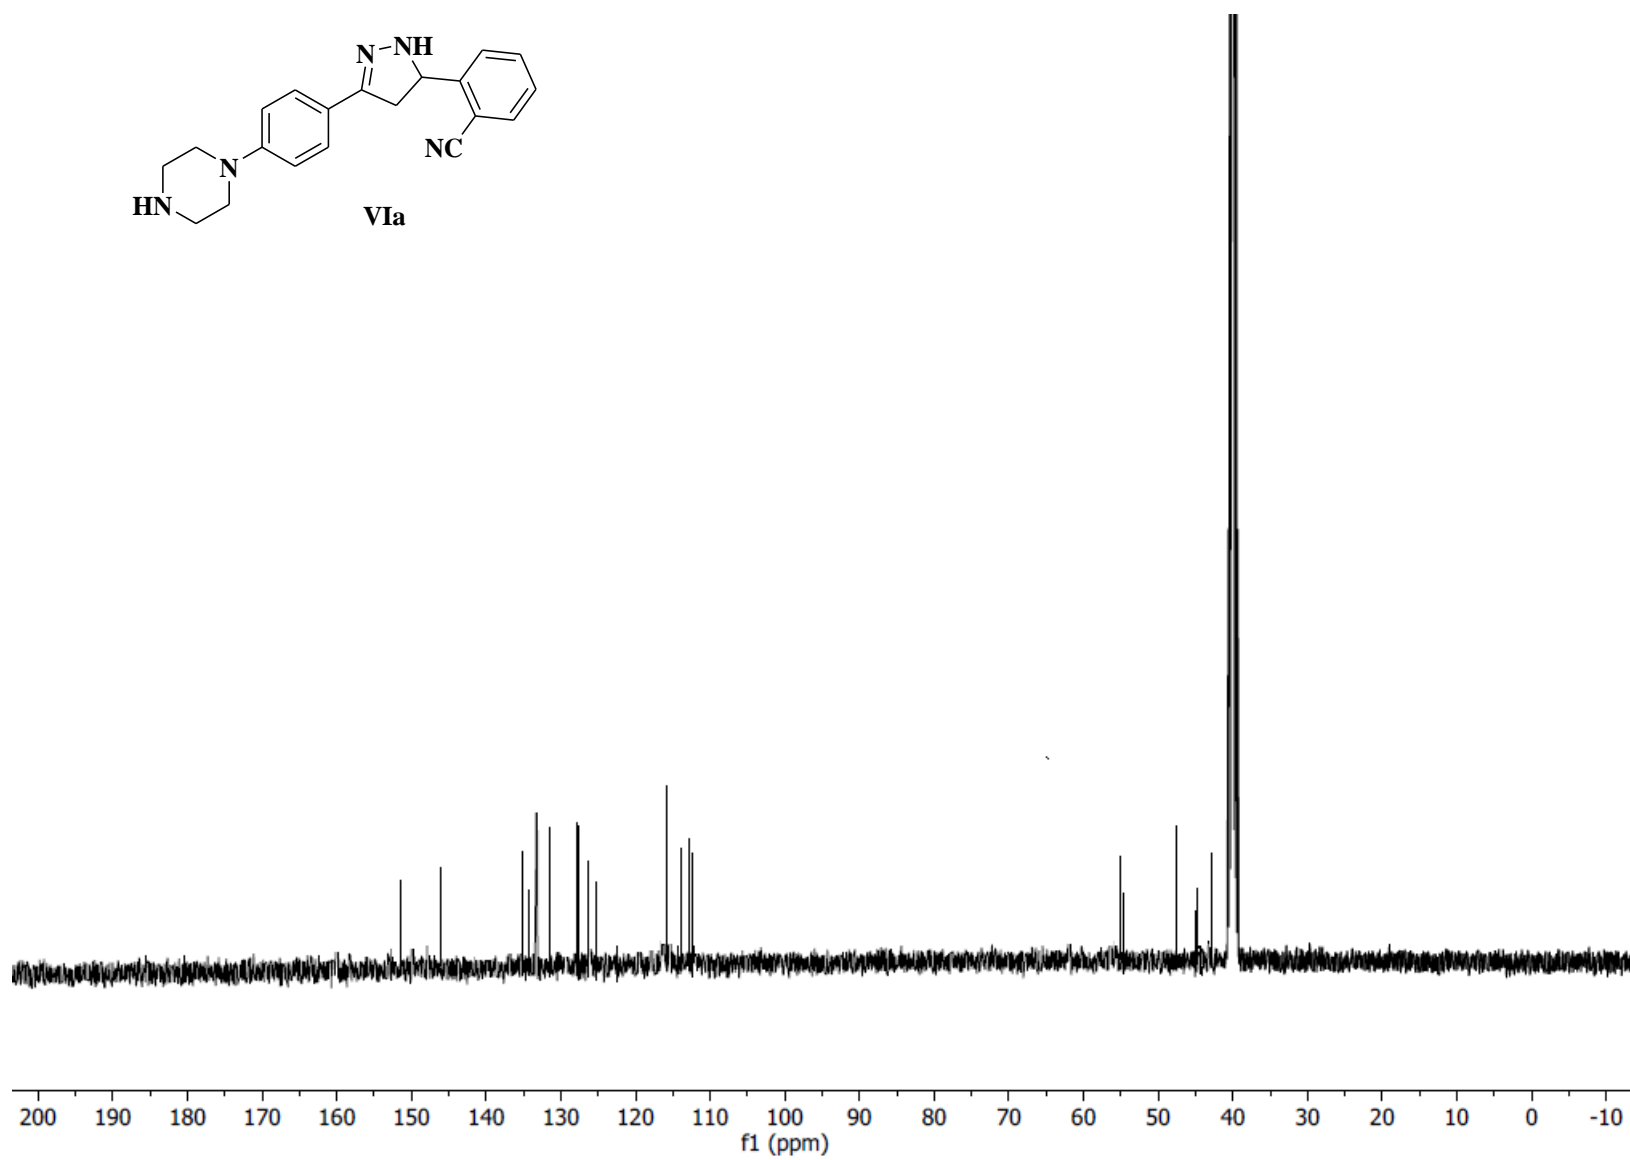



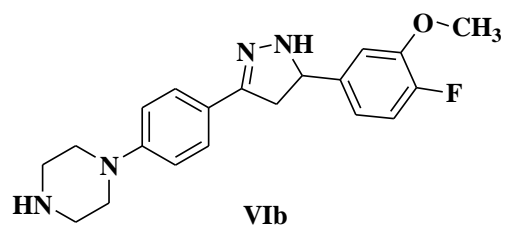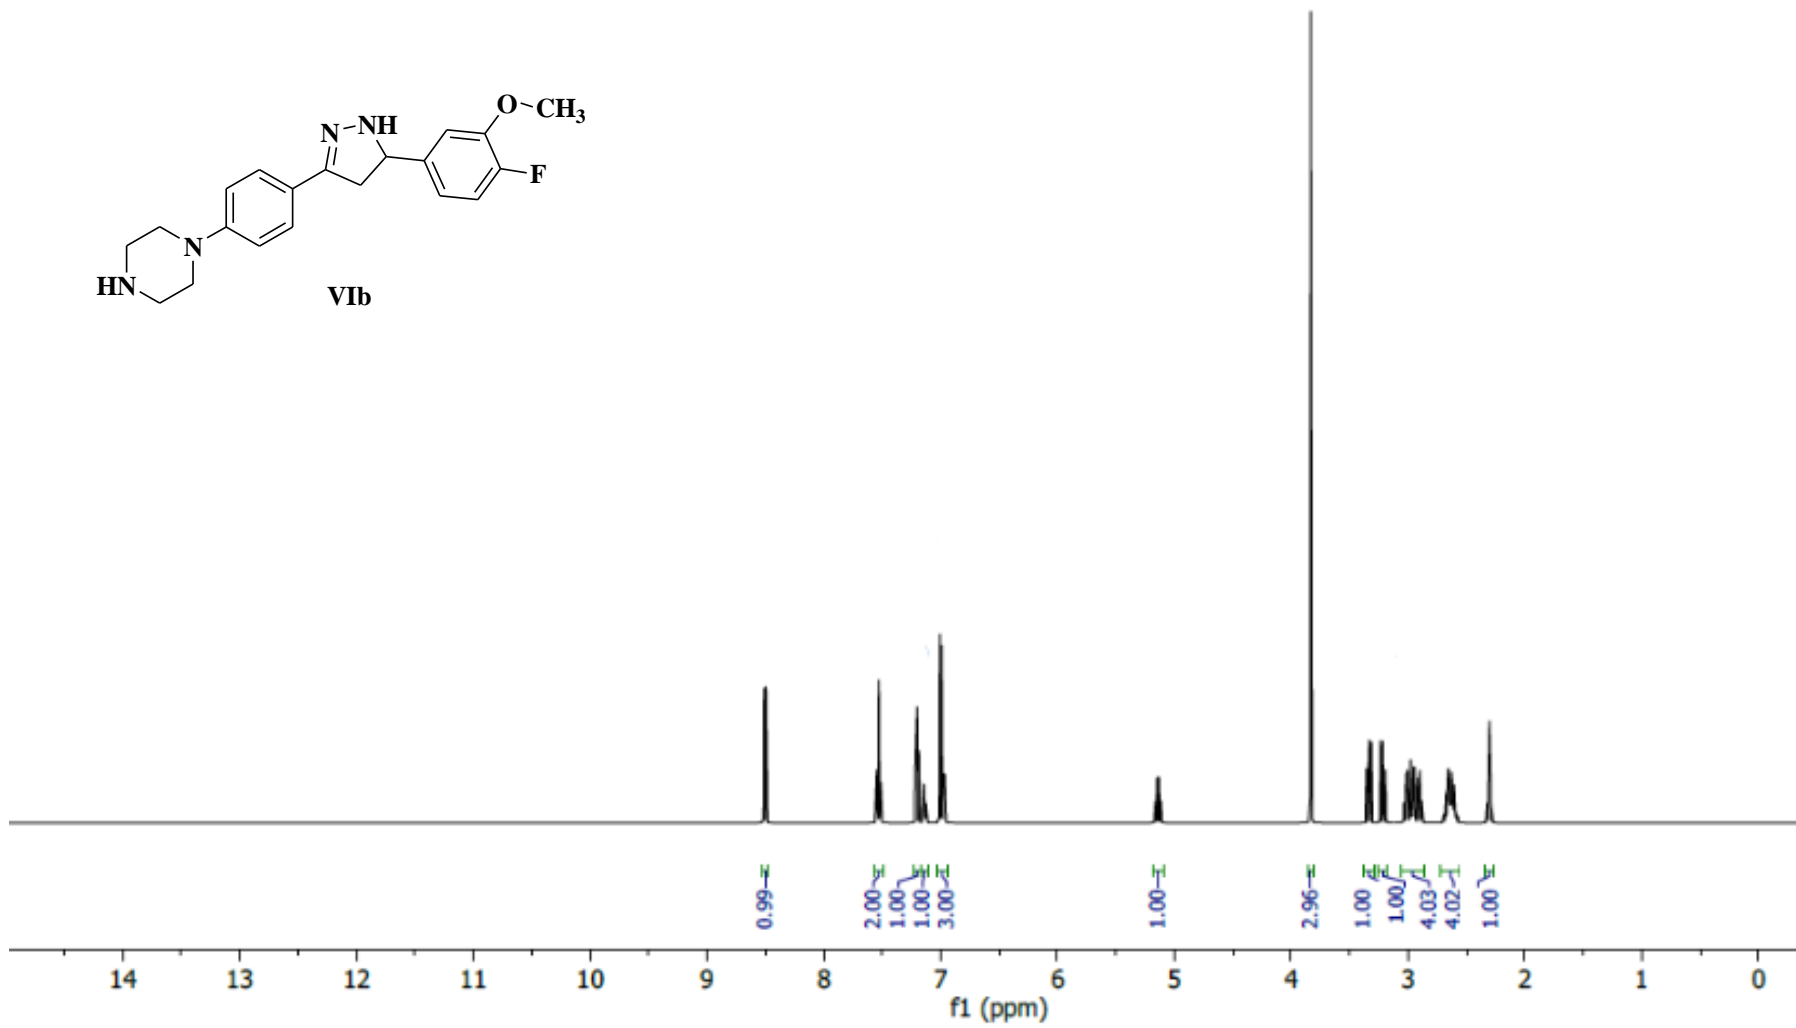

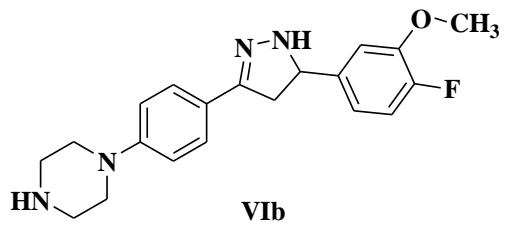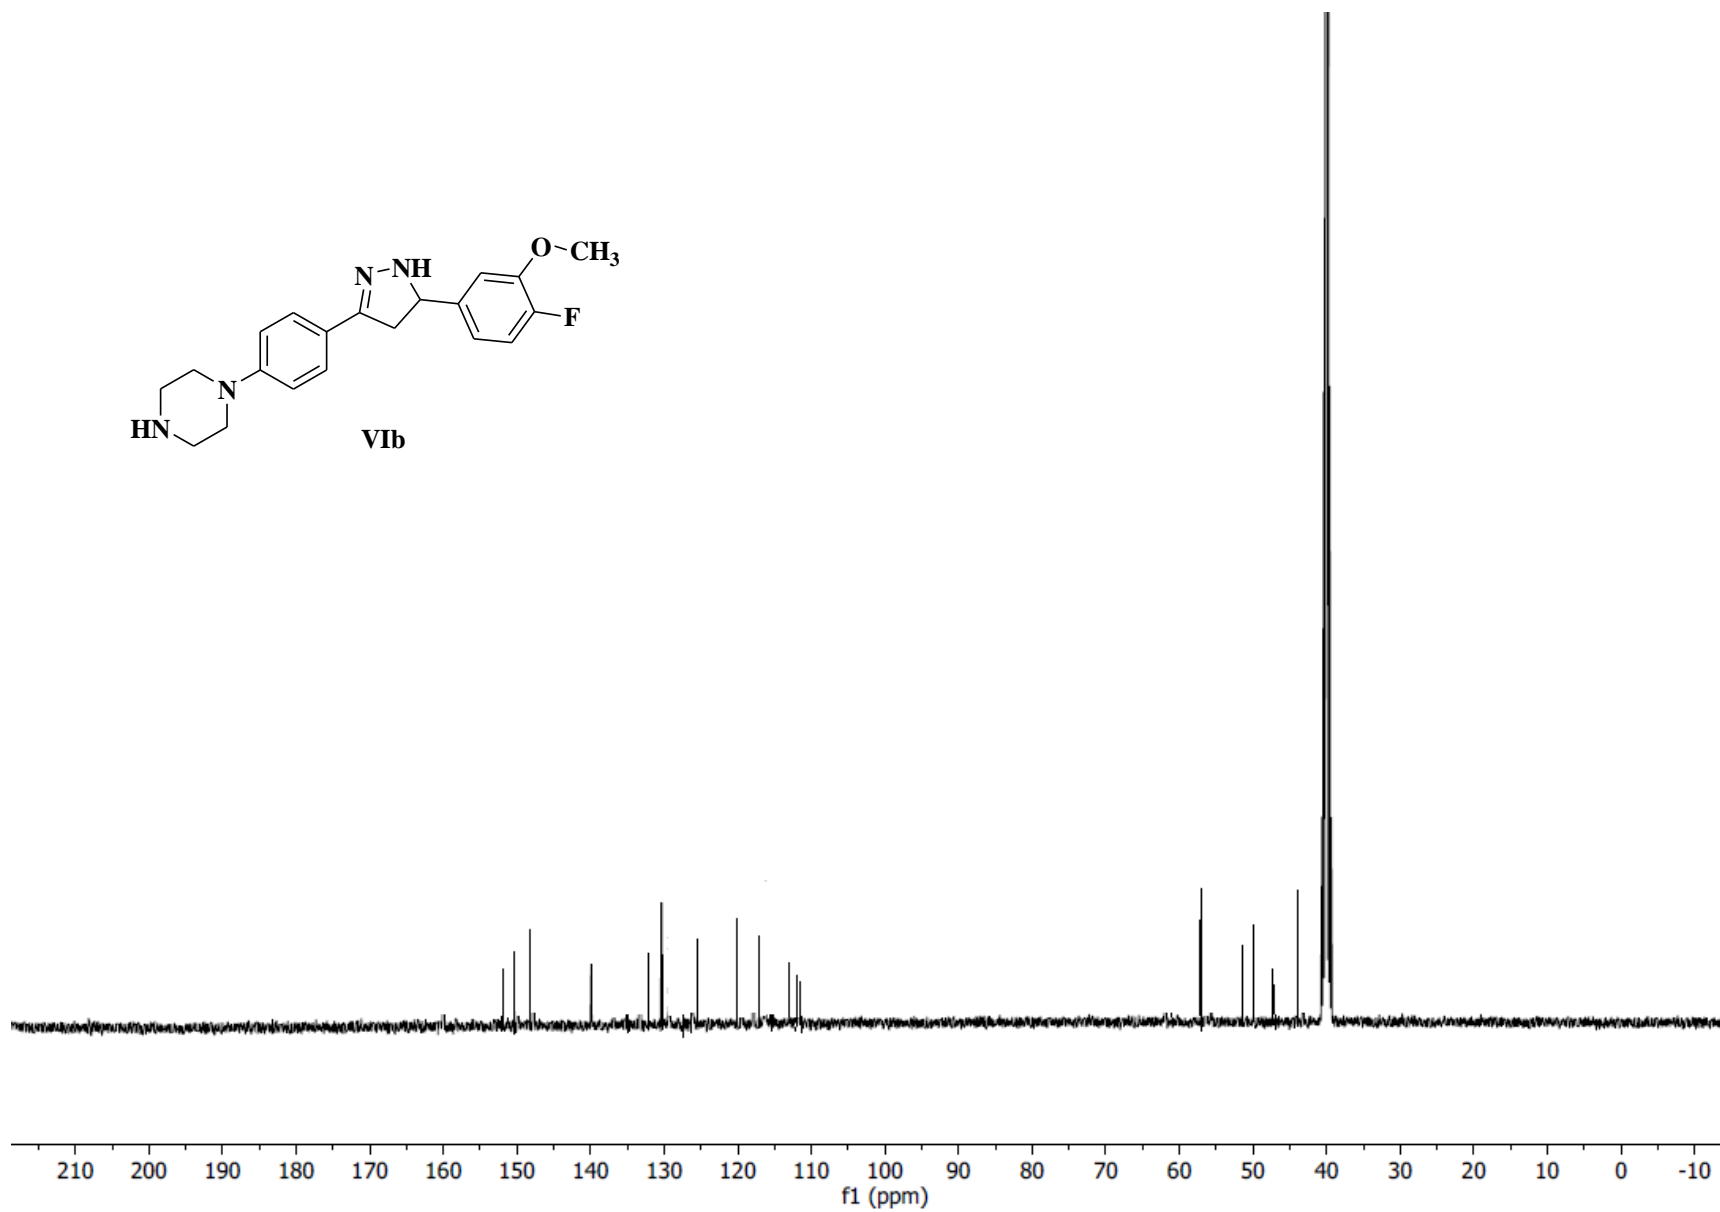

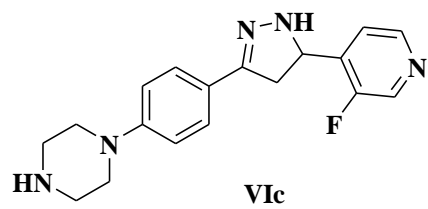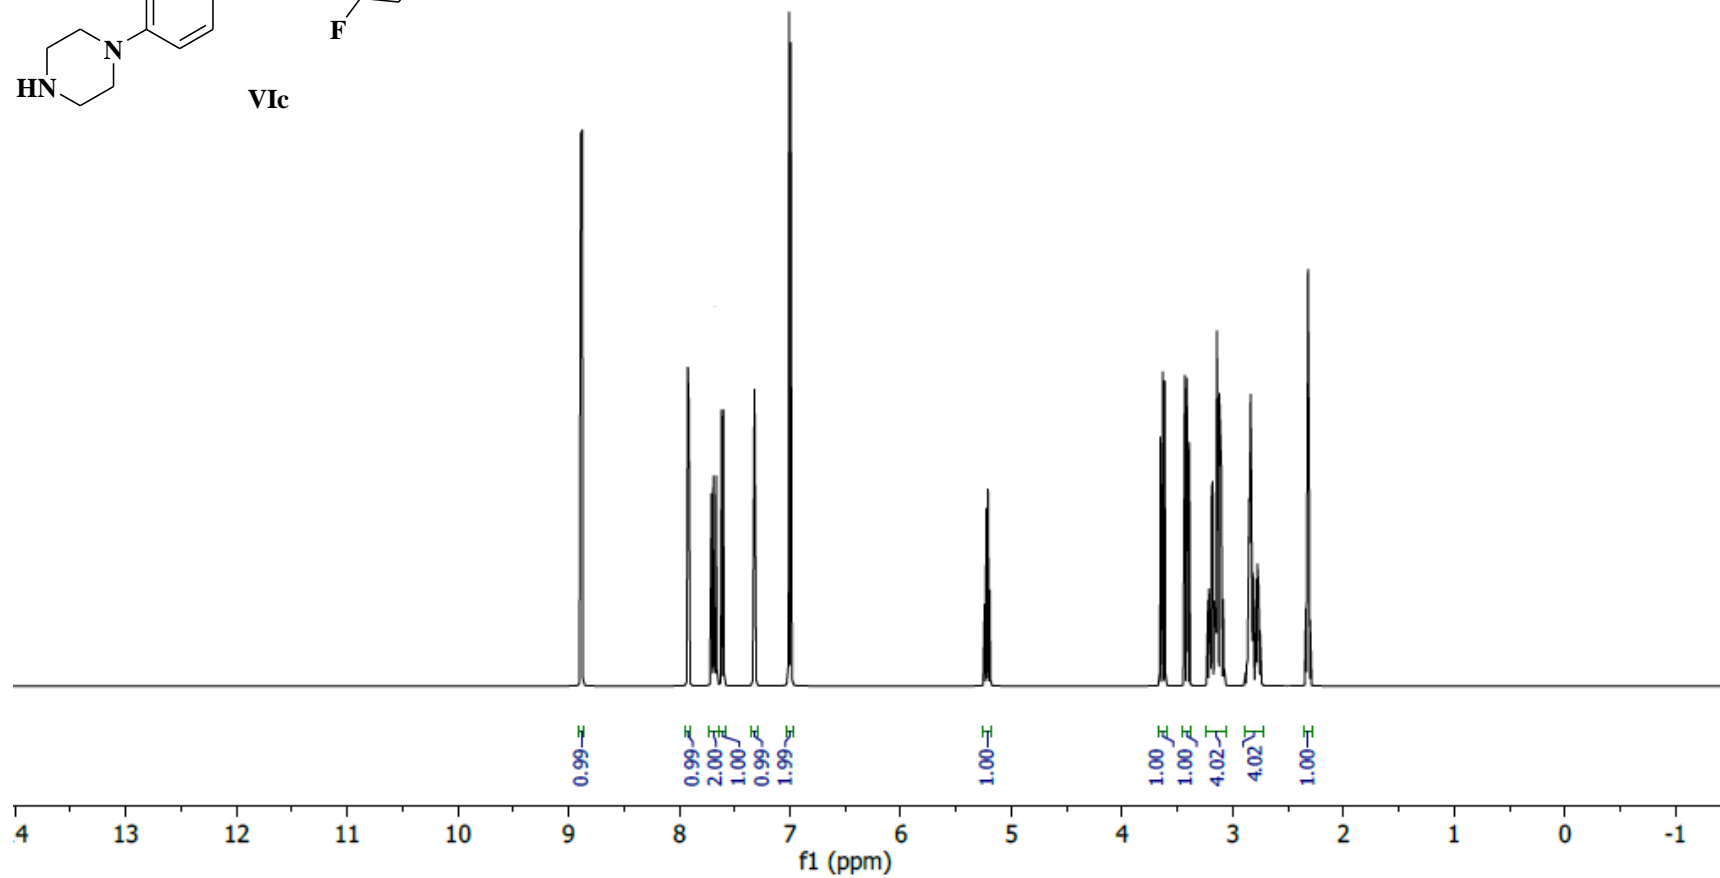

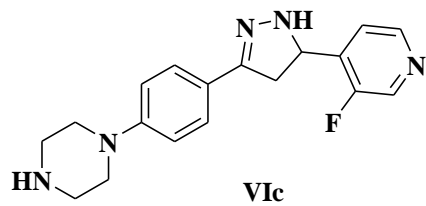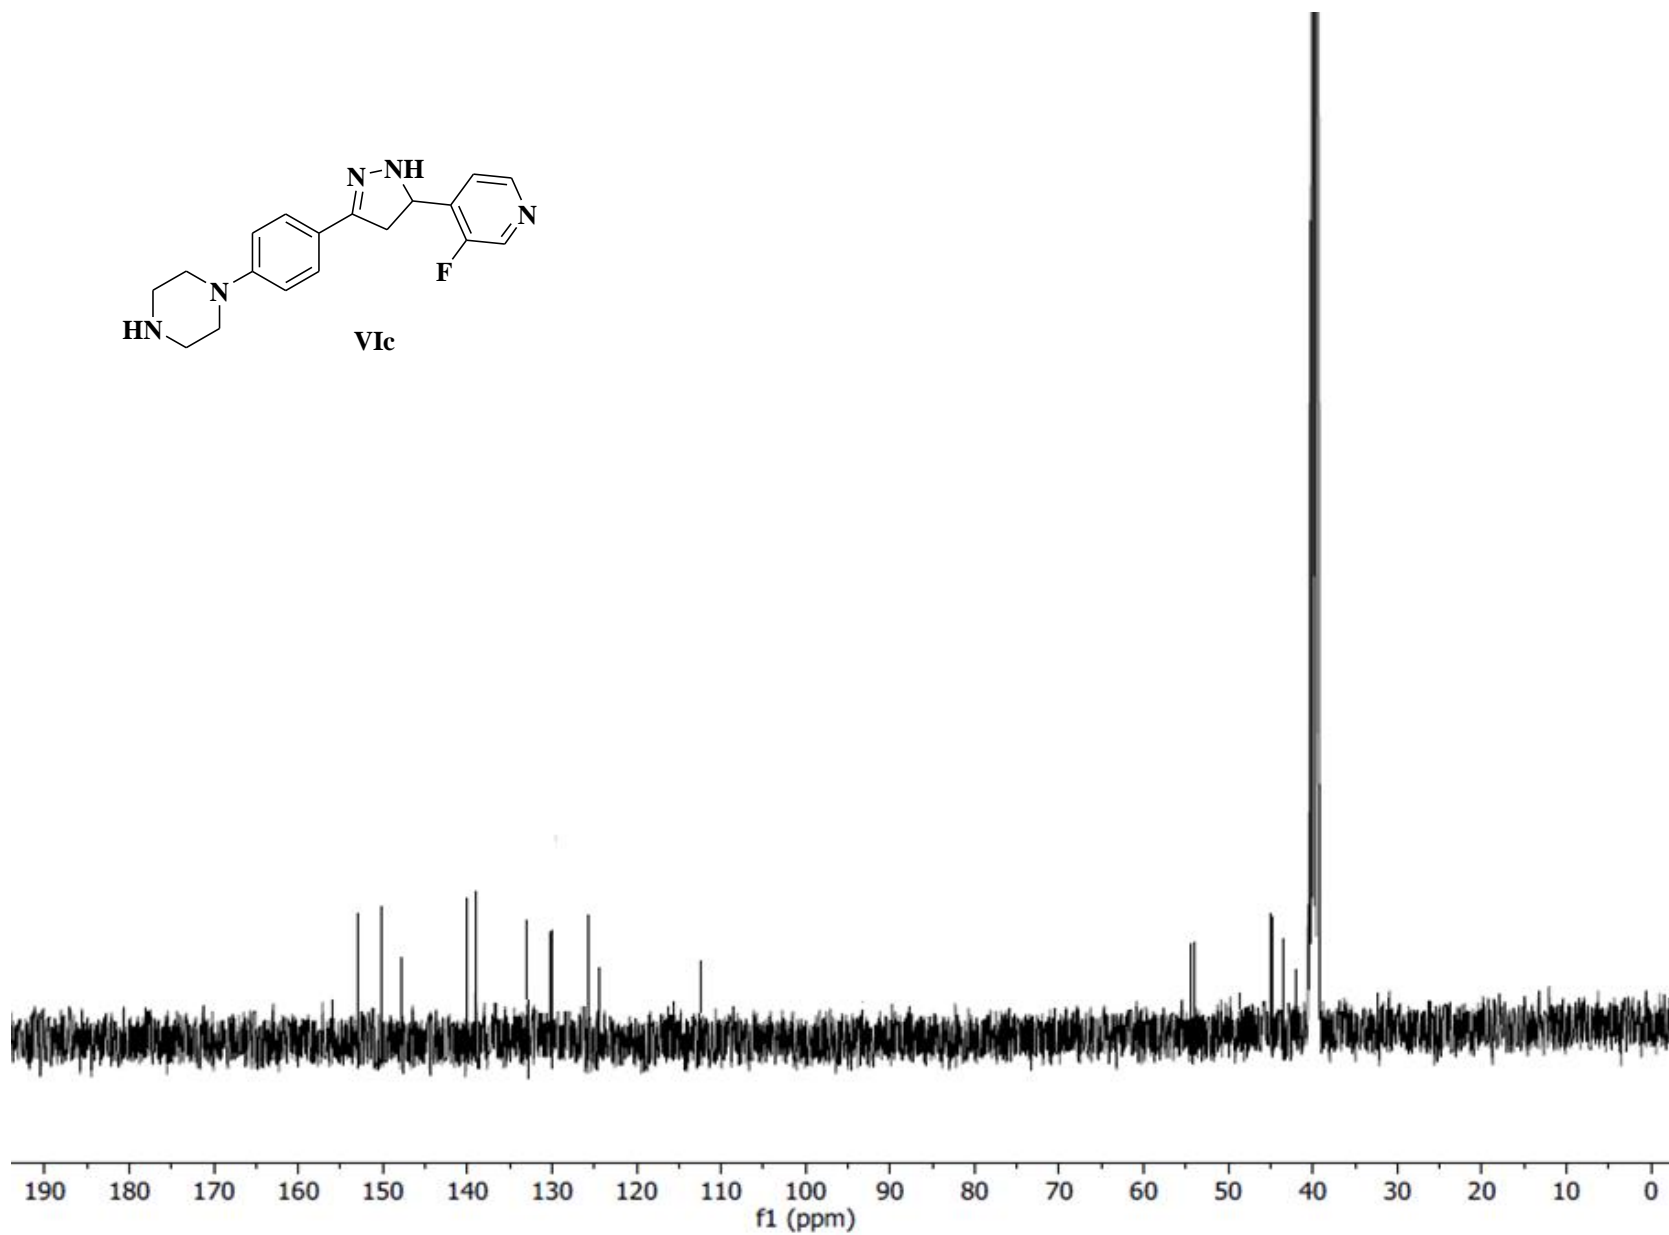

Supplement: IENZ_A_1861606_SM7084.pdf [file IENZ_A_1861606_SM7084.pdf]
